# Supplementary material for: Copper acetate catalysed C–C bond formation en route to the synthesis of spiro indanedione cyclopropylpyrazolones
Source: Royal Society of Chemistry journal article supplement (doi:10.1039/d1ob02351a), 2022-01-01
Supplement: d1ob02351a1.pdf [file d1ob02351a1.pdf]

## SUPPORTING INFORMATION

### **Copper acetate catalysed C-C bond formation en route to the synthesis of spiro indanedione cyclopropylpyrazolones**

Thirupathi Reddy Penjarla,<sup>a,b</sup> Adarash Kumar Shukla,<sup>a</sup> Rituparna Hazra,<sup>a</sup> Durba Roy,<sup>a</sup> Maheshwar Kunderapu,<sup>b</sup> Mudit Dixit<sup>a</sup> and Anupam Bhattacharya<sup>a\*</sup>

<sup>a</sup>Department of Chemistry, Birla Institute of Technology and Science-Pilani (Hyderabad Campus), Hyderabad-500078, India. <sup>b</sup>Department of Medicinal Chemistry, Aragen Life Sciences, Survey Nos: 125 (part) & 126, IDA Mallapur, Hyderabad 500076, India.

E-mail: [anupam@hyderabad.bits-pilani.ac.in](mailto:anupam@hyderabad.bits-pilani.ac.in); Tel: +91-40-66303522.

#### **Table of Contents:**

**Page 2-11: General procedure and analytical data.**

**Page 12-53: <sup>1</sup>H, <sup>13</sup>C and <sup>19</sup>F NMR spectroscopic data.**

**Page 55-72: Crystallographic data of compound 3a & 3p.**

**Page 73-115: Computational details.**

## Experimental

All the compounds and reagents required were purchased from commercial sources and were used without further purification. Solvents were dried and distilled using standard procedures before use.  $^1\text{H}$  NMR (400 MHz) and  $^{13}\text{C}$  (101 MHz) spectra were recorded in  $\text{CDCl}_3/\text{DMSO-d}_6$  and using  $(\text{CH}_3)_4\text{Si}$  as the internal standard. IR spectra were recorded as KBr plates on the Shimadzu-IR Affinity instrument. High-Resolution Mass spectra were recorded on Agilent 6545 Q-TOF LC/MS. Melting points were recorded on a Buchi-M565 melting point apparatus and are uncorrected.

**General procedure for the synthesis of compounds (3a-3s):** To a stirred solution of **1** (0.213 mmol) and **2** (0.23 mmol) in ethyl acetate (5 mL) was added triethylamine (0.319 mmol), and the reaction was stirred at 25 °C for 30 minutes. Subsequently,  $\text{Cu}(\text{OAc})_2$  (0.05 mmol) was introduced, and the reaction mixture was left to stir under an  $\text{O}_2$  atmosphere for additional 5 hours. Upon completion, the reaction mixture was evaporated under reduced pressure, and the crude product was chromatographed on silica gel by eluting with 20-35% EtOAc/hexanes to give the desired compound.

**3''-methyl-1'',3''-diphenyldispiro[indene-2,1'-cyclopropane-2',4''-pyrazole]-1,3,5''(1''*H*)-trione(3a).** (16:1, **dr**); **Yield:** 85%; **Light yellow**

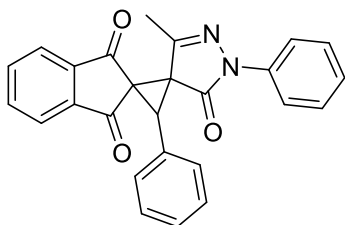

**solid;**  $R_f$ : 0.4[1:1 hexanes: ethyl acetate]; **M.P:** 85-90°C;  $\nu_{\text{max}}(\text{KBr})/\text{cm}^{-1}$ : 3410, 2950, 1720, 1500, 1210;  $^1\text{H}$  NMR (400 MHz,  $\text{CDCl}_3$ ) $\delta$ : 8.05 (dd,  $J = 6.0, 2.0$  Hz, 1H), 7.97 – 7.92 (m, 3H), 7.87 – 7.84 (m, 2H), 7.39 – 7.35 (m, 5H), 7.21 (dd,  $J = 3.8, 2.8$  Hz, 2H), 7.16 (t,  $J = 10.8$  Hz, 1H), 4.72 (s, 1H), 1.90 (s, 3H);  $^{13}\text{C}$  NMR (101 MHz,  $\text{CDCl}_3$ )  $\delta$ :

191.4, 187.9, 166.1, 154, 142.1, 141.8, 137.9, 136, 135.4, 130.1, 128.9, 128.8, 128.4, 125.1, 123.9, 123.1, 118.5, 51.9, 50.6, 42.2, 18.7; **HRMS-ESI (+)  $m/z$** : Calcd for  $C_{26}H_{19}N_2O_3$  [ $M+H^+$ ], 407.1390; found, 407.1399.

**3'-(3-Hydroxyphenyl)-3''-methyl-1''-phenyldispiro[indene-2,1'-cyclopropane-2',4''-pyrazole]-1,3,5''(1''*H*)-trione (3b).** (6:1, **dr**); **Yield:**

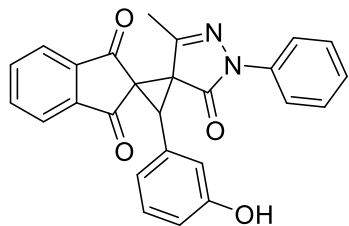

61%; **Brown gummy solid**;  $R_f$ : 0.3[1:1 hexanes: ethyl acetate];  $\nu_{\max}(\text{KBr})/\text{cm}^{-1}$ : 3420, 2900, 1720, 1500, 1250;  **$^1\text{H}$  NMR** (400 MHz,  $\text{CDCl}_3$ )  $\delta$ : 8.01 (dd,  $J = 6.1, 3.3$  Hz, 1H), 7.94 (dd,  $J = 5.7, 3.1$  Hz, 1H), 7.89 (d,  $J = 7.7$  Hz, 2H),

7.85 – 7.79 (m, 3H), 7.37 – 7.33 (m, 2H), 7.21 (t,  $J = 8.1$  Hz, 1H), 7.15 (s, 1H), 6.87 – 6.84 (m, 1H), 6.76 – 6.73 (m,

2H), 4.65 (s, 1H), 1.95 (s, 3H);  **$^{13}\text{C}$  NMR** (101 MHz,  $\text{CDCl}_3$ )  $\delta$ : 191.3, 188, 166.2, 155.9, 154.2, 142.1, 141.7, 137.9, 136, 135.4, 130.4, 129.6,

128.8, 125.2, 123.9, 123.1, 122.1, 118.6, 117.1, 115.7, 114.5, 51.9, 50.6, 41.9, 18.7; **HRMS-ESI (+)  $m/z$** : Calcd for  $C_{26}H_{19}N_2O_4$  [ $M+H^+$ ], 423.1339;

found, 423.1344.

**3'-(2-Methoxyphenyl)-3''-methyl-1''-phenyldispiro[indene-2,1'-cyclopropane-2',4''-pyrazole]-1,3,5''(1''*H*)-trione (3c).** (45:1, **dr**); **Yield:**

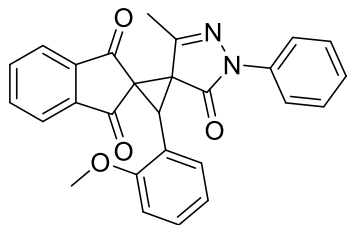

88%; **Brown solid**;  $R_f$ : 0.5[1:1 hexanes: ethyl acetate]; **M.P.**: 135-140°C;  $\nu_{\max}(\text{KBr})/\text{cm}^{-1}$ : 3410, 2965, 1720, 1520,

1340;  **$^1\text{H}$  NMR** (400 MHz,  $\text{CDCl}_3$ )  $\delta$ : 8.04 (dd,  $J = 6.1, 1.9$  Hz, 1H), 7.96 – 7.92 (m, 3H), 7.84 – 7.81 (m, 2H), 7.39

– 7.34 (m, 3H), 7.17 – 7.12 (m, 2H), 6.97 (d,  $J = 7.5$  Hz, 1H), 6.88 (d,  $J = 8.0$  Hz, 1H), 4.37 (s, 1H), 3.55 (s, 3H),

1.94 (s, 3H);  **$^{13}\text{C}$  NMR** (101 MHz,  $\text{CDCl}_3$ )  $\delta$ : 191.4, 188.8, 166.4, 157.8, 154.6, 141.9, 141.8, 138.1, 135.7, 135.2,

131.2, 129.9, 128.8, 124.9, 123.6, 122.8, 120.1, 118.5, 117.6, 110.4, 55.2, 51.8, 50.5, 38.5, 18.6; **HRMS-ESI (+)  $m/z$** : Calcd for  $C_{27}H_{21}N_2O_4$

[ $M+H^+$ ], 437.1496; found, 437.1501.

**3'-(2,5-Dimethoxyphenyl)-3''-methyl-1''-phenyldispiro[indene-2,1'-cyclopropane-2',4''-pyrazole]-1,3,5''(1''H)-trione (3d).** Yield: 85%;

**Light yellow solid;**  $R_f$ : 0.6[1:1 hexanes: ethyl acetate]; **M.P:** 165-170;  $\nu_{\max}(\text{KBr})/\text{cm}^{-1}$ : 3300, 2950, 1740, 1510, 1260;  $^1\text{H NMR}$  (400 MHz,

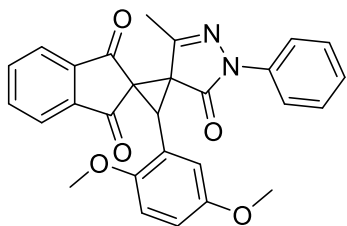

$\text{CDCl}_3$ )  $\delta$ : 8.02 (d,  $J = 6.0$  Hz, 1H), 7.94 (t,  $J = 8.9$  Hz, 3H), 7.85 – 7.79 (m, 2H), 7.36 (t,  $J = 7.4$  Hz, 2H), 7.15 (t,  $J = 7.3$  Hz, 1H), 6.88 (d,  $J = 8.9$  Hz, 1H), 6.79 (d,  $J = 8.9$  Hz, 1H), 6.71 (d,  $J = 2.6$  Hz, 1H), 4.35 (s, 1H), 3.74 (s, 3H), 3.49 (s, 3H), 1.99 (s, 3H);  $^{13}\text{C NMR}$  (101 MHz,  $\text{CDCl}_3$ )  $\delta$ : 191.1, 188.7, 166.3, 154.4, 152.9, 151.9, 141.9, 141.7, 138.1, 135.7, 135.3, 128.7, 124.9, 123.6, 122.8, 118.5, 118.3, 117.4, 114.2, 111.3, 55.8, 55.6, 51.7, 50.5, 38.4, 18.6;

**HRMS-ESI (+)  $m/z$ :** Calcd for  $\text{C}_{28}\text{H}_{23}\text{N}_2\text{O}_5$  [ $\text{M}+\text{H}^+$ ], 467.1601; found, 467.1614.

**3'-(2-Bromophenyl)-3''-methyl-1''-phenyldispiro[indene-2,1'-cyclopropane-2',4''-pyrazole]-1,3,5''(1''H)-trione (3f).** (16:1, **dr**); Yield: 80%;

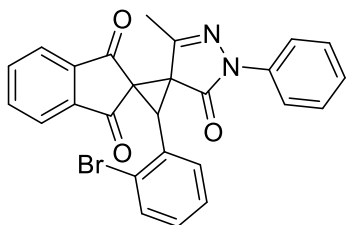

**Brown solid;**  $R_f$ : 0.4[3:1 hexanes: ethyl acetate]; **M.P:** 120-122;  $\nu_{\max}(\text{KBr})/\text{cm}^{-1}$ : 3420, 2945, 1720, 1520, 1210;  $^1\text{H NMR}$  (400 MHz,  $\text{CDCl}_3$ )  $\delta$ : 8.08 – 8.04 (m, 1H), 7.98 – 7.95 (m, 1H), 7.93 (d,  $J = 9.8$  Hz, 2H), 7.88 – 7.84 (m, 2H), 7.63 (d,  $J = 7.8$  Hz, 1H), 7.37 – 7.35 (m, 3H), 7.29 (d,  $J = 7.9$  Hz, 1H), 7.25 – 7.23 (m, 1H), 7.19 – 7.14 (m, 1H), 4.49

(s, 1H), 1.95 (s, 3H);  $^{13}\text{C NMR}$  (101 MHz,  $\text{CDCl}_3$ )  $\delta$ : 191.2, 187.7, 165.8, 153.6, 141.8, 137.9, 136, 135.4, 132.9, 132.1, 130.2, 129.2, 128.8, 127,

125.8, 125.2, 123.9, 123.2, 118.6, 52.1, 50.9, 42.7, 18.5; **HRMS-ESI (+)  $m/z$ :** Calcd for  $\text{C}_{26}\text{H}_{18}\text{BrN}_2\text{O}_3$  [ $\text{M}+\text{H}^+$ ], 485.0495; found, 485.0499.

**3'-(4-Bromophenyl)-3''-methyl-1''-phenyldispiro[indene-2,1'-cyclopropane-2',4''-pyrazole]-1,3,5''(1''H)-trione (3g).** (4:1, **dr**); **Yield:** 90%;

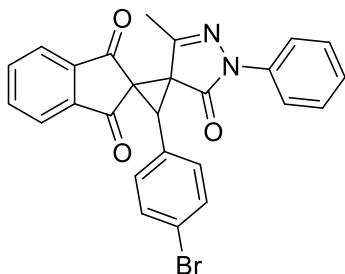

**Yellow solid;**  $R_f$ : 0.5[1:1 hexanes: ethyl acetate]; **M.P:** 100-103°C;  $\nu_{\max}(\text{KBr})/\text{cm}^{-1}$ : 3460, 2980, 1750, 1500, 1250;

$^1\text{H NMR}$  (400 MHz,  $\text{CDCl}_3$ )  $\delta$ : 8.06 – 8.03 (m, 1H), 7.98 – 7.95 (m, 1H), 7.93 – 7.90 (m, 2H), 7.88 – 7.87 (m, 1H), 7.86 – 7.85 (m, 1H), 7.52 – 7.49 (m, 2H), 7.36 (dd,  $J = 7.6, 6.5$  Hz, 2H), 7.16 – 7.14 (m, 1H), 7.12 – 7.09 (m, 2H), 4.61 (s, 1H), 1.91 (s, 3H);  $^{13}\text{C NMR}$  (101 MHz,  $\text{CDCl}_3$ )  $\delta$ : 191.3, 187.6, 165.9, 153.5, 142.0, 141.8, 137.9, 136.2,

135.5, 131.7, 131.6, 128.8, 125.2, 123.9, 123.2, 122.7, 118.5, 51.6, 50.3, 41.2, 18.7; **HRMS-ESI** (+)  $m/z$ : Calcd for  $\text{C}_{26}\text{H}_{18}\text{BrN}_2\text{O}_3$  [ $\text{M}+\text{H}^+$ ], 485.0495; found, 485.0508.

**3'-(2,5-Difluorophenyl)-3''-methyl-1''-phenyldispiro[indene-2,1'-cyclopropane-2',4''-pyrazole]-1,3,5''(1''H)-trione (3h).** (3:1, **dr**); **Yield:**

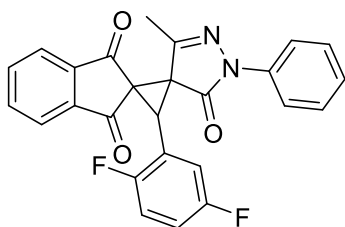

78%; **Brown solid;**  $R_f$ : 0.5[2:1 hexanes: ethyl acetate]; **M.P:** 120-123°C;  $\nu_{\max}(\text{KBr})/\text{cm}^{-1}$ : 3460, 2980, 1720, 1500,

1250;  $^1\text{H NMR}$  (400 MHz,  $\text{CDCl}_3$ )  $\delta$ : 8.05 (dd,  $J = 6.1, 1.8$  Hz, 1H), 7.97 (dd,  $J = 4.4, 2.7$  Hz, 1H), 7.93 – 7.91 (m, 2H), 7.87 – 7.84 (m, 3H), 7.36 (d,  $J = 7.6$  Hz, 2H), 7.16 (d,  $J = 7.3$  Hz, 1H), 7.10 – 7.05 (m, 2H), 4.42 (s, 1H), 2.01 (s, 3H);  $^{13}\text{C NMR}$  (101 MHz,  $\text{CDCl}_3$ )  $\delta$ : 191.1, 187.5, 165.6, 158.1 ( $^1J_{\text{C-F}} = 243$  HZ), 157.5 ( $^1J_{\text{C-F}} = 243$  HZ), 154.1,

153.1, 143.2, 141.9, 140.5, 137.8, 136.1, 135.5, 128.8, 125.2, 123.9, 123.2, 118.6, 118.2, 116.9, 50.5, 49.4, 35.5, 18.5;  $^{19}\text{F NMR}$  (377 MHz,  $\text{CDCl}_3$ )  $\delta$ : -116.8, -116.3; **HRMS-ESI** (+)  $m/z$ : Calcd for  $\text{C}_{26}\text{H}_{17}\text{F}_2\text{N}_2\text{O}_3$  [ $\text{M}+\text{H}^+$ ], 443.1202; found, 443.1214.

**3'-(2-Chloro-4-fluorophenyl)-3'-methyl-1''-phenyldispiro[indene-2,1'-cyclopropane-2',4''-pyrazole]-1,3,5''(1''H)-trione (3i).** (6:1, **dr**);

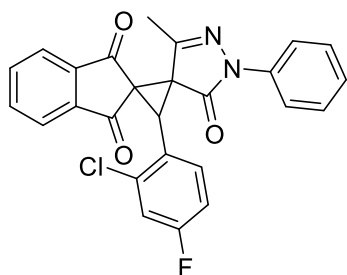

**Yield:** 80%; **Brown solid**;  $R_f$ : 0.5[3:2 hexanes: ethyl acetate]; **M.P:**190-195°C;  $\nu_{\max}(\text{KBr})/\text{cm}^{-1}$ : 3490, 2950, 1720, 1490, 1210;  $^1\text{H NMR}$  (400 MHz,  $\text{CDCl}_3$ )  $\delta$ : 8.06 (d,  $J = 7.2$  Hz, 1H), 7.95 (dd,  $J = 9.4, 7.3$  Hz, 3H), 7.86 (dd,  $J = 8.7, 3.5$  Hz, 2H), 7.39 – 7.35 (m, 3H), 7.22 – 7.15 (m, 2H), 7.05 – 7.00 (m, 1H), 4.45 (s, 1H), 1.95 (s, 3H);  $^{13}\text{C NMR}$  (101 MHz,  $\text{CDCl}_3$ )  $\delta$ : 191.2, 187.5, 165.7, 162.4(d,  $^1J_{\text{CF}} = 234$  Hz), 153.3, 141.8, 137.9, 136.1, 135.5, 135.3,

132.9, 128.8, 125.2, 123.9, 123.7, 123.5, 123.2, 118.5, 117.2, 113.9, 51.6, 50.4, 39.7, 18.5;  $^{19}\text{F NMR}$  (377 MHz,  $\text{CDCl}_3$ )  $\delta$ : -109.99; **HRMS-ESI** (+)  $m/z$ : Calcd for  $\text{C}_{26}\text{H}_{17}\text{ClFN}_2\text{O}_3$  [ $\text{M}+\text{H}^+$ ], 459.0906; found, 459.0915.

**3''-Methyl-3'-(naphthalen-1-yl)-1''-phenyldispiro[indene-2,1'-cyclopropane-2',4''-pyrazole]-1,3,5''(1''H)-trione (3j).** (25:1, **dr**); **Yield:**

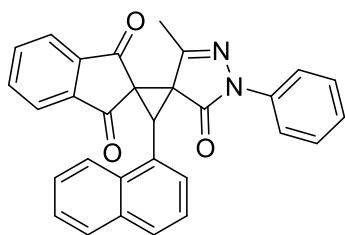

80%; **Lightbrown solid**;  $R_f$ : 0.5[1:1 hexanes: ethyl acetate]; **M.P:**160-165°C;  $\nu_{\max}(\text{KBr})/\text{cm}^{-1}$ : 3480, 2990, 1710, 1510, 1200;  $^1\text{H NMR}$  (400 MHz,  $\text{CDCl}_3$ )  $\delta$ : 8.09 (d,  $J = 7.5$  Hz, 1H), 7.96 (dd,  $J = 14.0, 4.8$  Hz, 3H), 7.91 – 7.83 (m, 4H), 7.55 (d,  $J = 8.3$  Hz, 1H), 7.51 – 7.43 (m, 3H), 7.42 – 7.35 (m, 4H), 7.18 (t,  $J = 7.0$  Hz, 1H), 4.97 (s, 1H), 1.63 (s, 3H);  $^{13}\text{C NMR}$  (101 MHz,  $\text{CDCl}_3$ )  $\delta$ : 191.3, 188.1, 166.1, 154.3, 142.1, 141.7, 138, 136, 135.5, 133.5, 132.2,

129.4, 129, 128.8, 128.7, 127.3, 126.1, 125.2, 124.7, 124.6, 123.9, 123.2, 122.8, 118.6, 52.5, 50.9, 40.6, 18.1; **HRMS-ESI** (+)  $m/z$ : Calcd for  $\text{C}_{30}\text{H}_{21}\text{N}_2\text{O}_3$  [ $\text{M}+\text{H}^+$ ], 457.1547; found, 457.1556.

**3''-Methyl-3'-phenyl-1''-(p-tolyl)dispiro[indene-2,1'-cyclopropane-2',4''-pyrazole]-1,3,5''(1''H)-trione (3k).** (6:1, dr); Yield: 78%; Brown

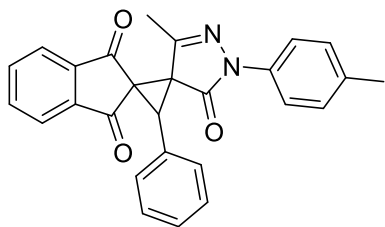

**solid**;  $R_f$ : 0.6[1:1 hexanes: ethyl acetate]; **M.P.**: 155-158°C;  $\nu_{\max}(\text{KBr})/\text{cm}^{-1}$ : 3490, 2930, 1740, 1500, 1250;  **$^1\text{H}$**

**NMR** (400 MHz,  $\text{CDCl}_3$ )  $\delta$ : 8.05 (dd,  $J = 6.0, 1.9$  Hz, 1H), 7.96 (dd,  $J = 5.6, 1.7$  Hz, 1H), 7.87 – 7.84 (m, 2H),

7.80 (d,  $J = 8.6$  Hz, 2H), 7.37 (d,  $J = 2.2$  Hz, 2H), 7.36 (d,  $J = 1.2$  Hz, 1H), 7.23 – 7.20 (m, 2H), 7.17 (d,  $J = 8.3$

Hz, 2H), 4.71 (s, 1H), 2.32 (s, 3H), 1.89 (s, 3H);  **$^{13}\text{C}$  NMR** (101 MHz,  $\text{CDCl}_3$ )  $\delta$ : 191.5, 187.9, 165.9, 153.8, 142.1, 141.8, 135.9, 135.6, 135.4,

134.8, 130.1, 129.3, 128.9, 128.5, 128.4, 128.2, 123.9, 123.1, 118.5, 51.8, 50.5, 42.1, 20.9, 18.7; **HRMS-ESI** (+)  $m/z$ : Calcd for  $\text{C}_{27}\text{H}_{21}\text{N}_2\text{O}_3$

$[\text{M}+\text{H}^+]$ , 421.1547; found, 421.1559.

**3'-(2-Chloro-4-fluorophenyl)-3''-methyl-1''-(p-tolyl)dispiro[indene-2,1'-cyclopropane-2',4''-pyrazole]-1,3,5''(1''H)-trione (3l).** (2:1, dr);

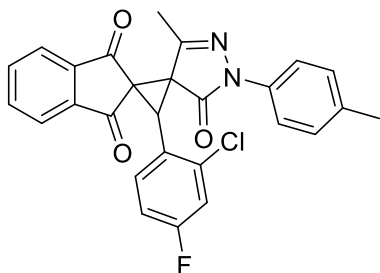

**Yield: 80%; Brown solid**;  $R_f$ : 0.2[2:1 hexanes: ethyl acetate]; **M.P.**: 120-123°C;  $\nu_{\max}(\text{KBr})/\text{cm}^{-1}$ : 3450, 2950, 1720,

1500, 1210;  **$^1\text{H}$  NMR** (400 MHz,  $\text{CDCl}_3$ )  $\delta$ : 7.98 (d,  $J = 6.5$  Hz, 1H), 7.89 (d,  $J = 6.4$  Hz, 1H), 7.82 – 7.76 (m, 3H),

7.71 (d,  $J = 8.6$  Hz, 2H), 7.14 (dd,  $J = 6.1, 2.6$  Hz, 1H), 7.10 (d,  $J = 8.3$  Hz, 2H), 6.96 – 6.92 (m, 1H), 4.36 (s, 1H),

2.25 (s, 3H), 1.87 (s, 3H);  **$^{13}\text{C}$  NMR** (101 MHz,  $\text{CDCl}_3$ )  $\delta$ : 191.3, 187.5, 164.6 ( $J = 252$  Hz), 154.2, 153.1, 141.9,

136.1, 135.5, 135.3, 134.8, 132.9, 129.3, 123.9, 123.6, 123.2, 118.6, 117.3, 117.1, 113.9, 113.7, 51.5, 50.4, 39.6, 20.9, 18.5;  **$^{19}\text{F}$  NMR** (377 MHz,

$\text{CDCl}_3$ )  $\delta$ : -110.33; **HRMS-ESI** (+)  $m/z$ : Calcd for  $\text{C}_{27}\text{H}_{19}\text{ClF}\text{N}_2\text{O}_3$   $[\text{M}+\text{H}^+]$ , 473.1063; found, 473.1071.

**3''-Methyl-3'-(naphthalen-1-yl)-1''-(p-tolyl)dispiro[indene-2,1'-cyclopropane-2',4''-pyrazole]-1,3,5''(1''H)-trione (3m).** (13:1, dr); Yield:

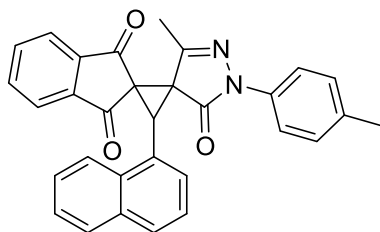

82%; **Brown gummy solid**;  $R_f$ : 0.4[1:1 hexanes: ethyl acetate];  $\nu_{\max}(\text{KBr})/\text{cm}^{-1}$ : 3430, 2955, 1720, 1510, 1200;

$^1\text{H NMR}$  (400 MHz,  $\text{CDCl}_3$ )  $\delta$ : 8.12 – 8.09 (m, 1H), 7.95 (d,  $J = 7.3$  Hz, 1H), 7.90 (d,  $J = 8.8$  Hz, 3H), 7.88 – 7.86 (m, 1H), 7.85 (d,  $J = 1.7$  Hz, 1H), 7.83 (d,  $J = 1.8$  Hz, 1H), 7.54 (d,  $J = 8.5$  Hz, 1H), 7.49 – 7.42 (m, 3H), 7.37 (d,

$J = 7.1$  Hz, 1H), 7.19 (d,  $J = 8.3$  Hz, 2H), 4.96 (s, 1H), 2.34 (s, 3H), 1.62 (s, 3H);  $^{13}\text{C NMR}$  (101 MHz,  $\text{CDCl}_3$ )  $\delta$ :

191.4, 188.2, 165.9, 154.2, 142.2, 141.8, 136, 135.7, 135.5, 134.9, 133.5, 132.3, 129.4, 129.4, 129, 128.7, 127.3, 126.1, 124.7, 123.9, 123.2, 122.9, 118.6, 52.5, 50.9, 40.6, 20.9, 18.1; **HRMS-ESI** (+)  $m/z$ : Calcd for  $\text{C}_{31}\text{H}_{23}\text{N}_2\text{O}_3$  [ $\text{M}+\text{H}^+$ ], 471.1703; found, 471.1705.

**3''-(4-fluorophenyl)-1''-(4-methoxyphenyl)-3''-methyldispiro[indene-2,1'-cyclopropane-2',4''-pyrazole]-1,3,5''(1''H)-trione (3n).** (3:1, dr);

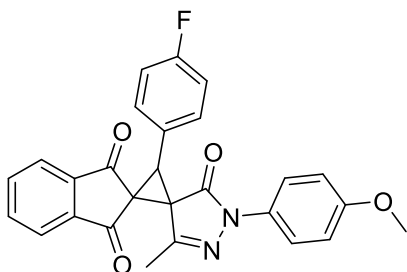

**Yield:** 75%; **Brown solid**;  $R_f$ : 0.4[5:1 hexanes: ethyl acetate]; **M.P.:** 190-192°C;  $\nu_{\max}(\text{KBr})/\text{cm}^{-1}$ : 3400, 2955,

1720, 1510, 1200;  $^1\text{H NMR}$  (400 MHz,  $\text{CDCl}_3$ )  $\delta$ : 7.96 (dd,  $J = 7.5, 1.9$  Hz, 1H), 7.89 – 7.86 (m, 1H), 7.79 – 7.76 (m, 2H), 7.72 (d,  $J = 9.2$  Hz, 2H), 7.14 – 7.10 (m, 2H), 6.99 (d,  $J = 8.6$  Hz, 2H), 6.80 (d,  $J = 9.2$  Hz, 2H),

4.55 (s, 1H), 3.71 (s, 3H), 1.81 (s, 3H);  $^{13}\text{C NMR}$  (101 MHz,  $\text{CDCl}_3$ )  $\delta$ : 191.4, 187.7, 165.6, 162.7 (d,  $J = 269$

Hz), 157.0, 153.4, 142.1, 141.8, 136.1, 135.3, 134.5, 131.8(d,  $J = 8$  Hz), 124.8(d,  $J = 2$  Hz), 123.9, 123.1, 120.2, 115.5(d,  $J = 22$  Hz), 113.9, 55.4, 51.7, 50.5, 41.2, 18.6;  $^{19}\text{F NMR}$  (377 MHz,  $\text{CDCl}_3$ )  $\delta$ : -112.67; **HRMS-ESI** (+)  $m/z$ : Calcd for  $\text{C}_{31}\text{H}_{23}\text{N}_2\text{O}_3$  [ $\text{M}+\text{H}^+$ ], 455.1402; found, 455.1403.



**1''-(4-fluorophenyl)-3''-methyl-3'-phenyldispiro[indene-2,1'-cyclopropane-2',4''-pyrazole]-1,3,5''(1''H)-trione (3o).** (9:1, dr); Yield: 78%;

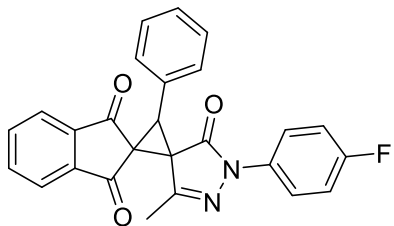

**Brown solid;**  $R_f$ : 0.5[4:2 hexanes: ethyl acetate]; **M.P.:** 180-183°C;  $\nu_{\max}(\text{KBr})/\text{cm}^{-1}$ : 3425, 2955, 1720, 1500, 1200;  $^1\text{H NMR}$  (400 MHz,  $\text{CDCl}_3$ )  $\delta$ : 8.05 (dd,  $J = 6.0, 1.9$  Hz, 1H), 7.97 (dd,  $J = 6.0, 2.1$  Hz, 1H), 7.92 – 7.89 (m, 2H), 7.88 – 7.85 (m, 2H), 7.39 – 7.35 (m, 3H), 7.23 – 7.19 (m, 2H), 7.08 – 7.03 (m, 2H), 4.71 (s, 1H), 1.89 (s, 3H);  $^{13}\text{C NMR}$  (101 MHz,  $\text{CDCl}_3$ )  $\delta$ : 191.3, 187.9, 166.0, 159.9(d,  $^1J_{\text{CF}} = 245$  Hz), 154.2, 142.1, 141.7, 136.1, 135.5, 130.1, 128.8, 128.5, 128.4, 128.2, 123.9, 123.2, 120.3(d,  $^3J_{\text{CF}} = 8$  Hz), 115.4(d,  $^2J_{\text{CF}} = 22$  Hz), 51.8, 50.6, 42.3, 18.7;  $^{19}\text{F NMR}$  (377 MHz,  $\text{CDCl}_3$ )  $\delta$ : -117.71; **HRMS-ESI** (+)  $m/z$ : Calcd for  $\text{C}_{26}\text{H}_{18}\text{FN}_2\text{O}_3$  [ $\text{M}+\text{H}^+$ ], 425.1296; found, 425.1306.

**1''-(4-Chlorophenyl)-3''-methyl-3'-phenyldispiro[indene-2,1'-cyclopropane-2',4''-pyrazole]-1,3,5''(1''H)-trione (3p).** (8:1, dr); Yield: 81%;

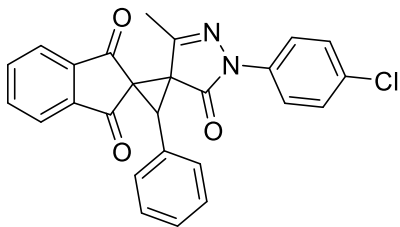

**Brown solid;**  $R_f$ : 0.5[4:1 hexanes: ethyl acetate]; **M.P.:** 118-122;  $\nu_{\max}(\text{KBr})/\text{cm}^{-1}$ : 3430, 2950, 1715, 1510, 1200;  $^1\text{H NMR}$  (400 MHz,  $\text{CDCl}_3$ )  $\delta$ : 8.06 (dd,  $J = 6.1, 1.9$  Hz, 1H), 7.97 (dd,  $J = 6.0, 2.1$  Hz, 1H), 7.93 – 7.89 (m, 2H), 7.87 (td,  $J = 4.7, 2.2$  Hz, 2H), 7.37 (dd,  $J = 5.0, 1.8$  Hz, 3H), 7.33 (d,  $J = 9.0$  Hz, 2H), 7.23 – 7.18 (m, 2H), 4.71 (s, 1H), 1.89 (s, 3H);  $^{13}\text{C NMR}$  (101 MHz,  $\text{CDCl}_3$ )  $\delta$ : 191.3, 187.9, 166.2, 154.4, 142.1, 141.7, 136.6, 136.1, 135.5, 133.9, 130.2, 130.1, 128.8, 128.8, 128.6, 128.5, 123.9, 123.2, 119.6, 51.8, 50.6, 42.3, 18.7; **HRMS-ESI** (+)  $m/z$ : Calcd for  $\text{C}_{26}\text{H}_{18}\text{ClN}_2\text{O}_3$  [ $\text{M}+\text{H}^+$ ], 441.1000; found, 441.1010.

**1''-(4-Chlorophenyl)-3''-methyl-3'-(4-nitrophenyl)dispiro[indene-2,1'-cyclopropane-2',4''-pyrazole]-1,3,5''(1''H)-trione (3q).** (2:1, dr);

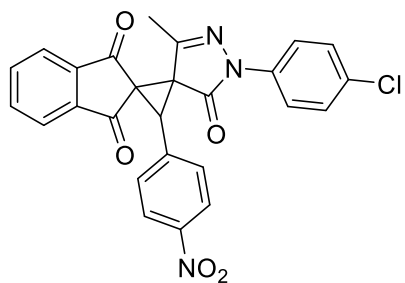

**Yield:** 78%; **Brown solid;**  $R_f$ : 0.5[3:1 hexanes: ethyl acetate]; **M.P:** 110-112°C;  $\nu_{\max}(\text{KBr})/\text{cm}^{-1}$ : 3420, 2950, 1720, 1500, 1210;  $^1\text{H NMR}$  (400 MHz,  $\text{CDCl}_3$ )  $\delta$ : 8.25 (d,  $J = 8.7$  Hz, 2H), = 8.8 Hz, 1H), 8.08 (d,  $J = 6.3$  Hz, 1H), 8.00 – 7.98 (m, 1H), 7.90 (d,  $J = 2.1$  Hz, 2H), 7.88 (s, 1H), 7.83 (d,  $J = 9.1$  Hz, 1H), 7.43 (d,  $J = 8.8$  Hz, 2H), 7.34 (d,  $J = 9.0$  Hz, 2H), 4.69 (s, 1H), 1.89 (s, 3H);  $^{13}\text{C NMR}$  (101 MHz,  $\text{CDCl}_3$ )  $\delta$ : 191, 187.1, 165.5,

153.2, 147.9, 141.9, 136.5, 136.4, 135.8, 135.7, 131.4, 131.2, 128.9, 128.9, 124.1, 123.7, 123.4, 119.6, 51.2, 50.1, 40.7, 18.7; **HRMS-ESI (+)  $m/z$ :** Calcd for  $\text{C}_{26}\text{H}_{17}\text{ClN}_3\text{O}_5$  [ $\text{M}+\text{H}^+$ ], 486.0851; found, 486.0861.

**1''-(4-Bromophenyl)-3''-methyl-3'-phenyldispiro[indene-2,1'-cyclopropane-2',4''-pyrazole]-1,3,5''(1''H)-trione (3r).** (12:1, dr); **Yield:** 75%;

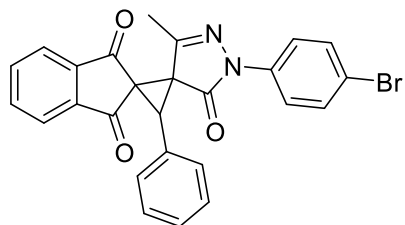

**Brown gummy solid;**  $R_f$ : 0.5[1:1 hexanes: ethyl acetate];  $\nu_{\max}(\text{KBr})/\text{cm}^{-1}$ : 3410, 2950, 1720, 1500, 1210;  $^1\text{H NMR}$  (400 MHz,  $\text{CDCl}_3$ )  $\delta$  7.98 (d,  $J = 6.5$ , 1H), 7.89 (d,  $J = 6.0$ , 1H), 7.87 – 7.84 (m, 2H), 7.80 – 7.77 (m, 2H), 7.55 (dd,  $J = 7.8, 1.3$  Hz, 1H), 7.30 – 7.25 (m, 3H), 7.22 (dd,  $J = 7.7, 1.9$  Hz, 1H), 7.18 – 7.14 (m, 1H), 7.09 (t,  $J = 8.0$  Hz, 1H), 4.42 (s, 1H), 1.87 (s, 3H);  $^{13}\text{C NMR}$  (101 MHz,  $\text{CDCl}_3$ )  $\delta$ : 191.3, 187.9, 166.1, 154.5,

142.1, 141.7, 137.1, 136.1, 135.5, 131.8, 130.1, 128.7, 128.6, 128.5, 123.9, 123.2, 119.9, 117.9, 51.8, 50.6, 42.3, 18.7; **HRMS-ESI (+)  $m/z$ :** Calcd for  $\text{C}_{26}\text{H}_{18}\text{BrN}_2\text{O}_3$  [ $\text{M}+\text{H}^+$ ], 485.0495; found, 485.0504.

**1''-(4-Bromophenyl)-3'-(2-methoxyphenyl)-3''-methylspiro[indene-2,1'-cyclopropane-2',4''-pyrazole]-1,3,5'''(1''*H*)-trione (3s).** (5:1, **dr**);

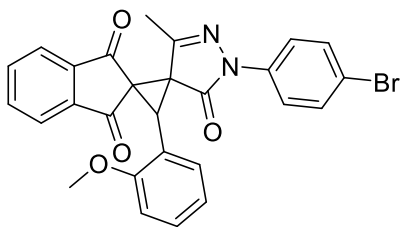

**Yield:** 80%; **Brown gummy solid**;  $R_f$ : 0.5[1:1 hexanes: ethyl acetate];  $\nu_{\max}(\text{KBr})/\text{cm}^{-1}$ : 3430, 2955, 1720, 1510, 1200;  $^1\text{H NMR}$  (400 MHz,  $\text{CDCl}_3$ )  $\delta$ : 8.06 – 8.03 (m, 1H), 7.95 – 7.92 (m, 1H), 7.89 (d,  $J = 2.1$  Hz, 1H), 7.87 (d,  $J = 2.1$  Hz, 1H), 7.84 (dd,  $J = 2.1, 1.1$  Hz, 1H), 7.83 (d,  $J = 1.4$  Hz, 1H), 7.49 – 7.46 (m, 2H), 7.38 (dd,  $J = 7.0, 6.2$  Hz, 1H), 7.12 (d,  $J = 7.4$  Hz, 1H), 6.98 (d,  $J = 7.5$  Hz, 1H), 6.88 (d,  $J = 7.8$  Hz, 1H), 4.36 (s, 1H), 3.55

(s, 3H), 1.93 (s, 3H);  $^{13}\text{C NMR}$  (101 MHz,  $\text{CDCl}_3$ )  $\delta$ : 191.3, 188.8, 166.5, 157.8, 155.1, 141.9, 141.8, 137.2, 135.7, 135.3, 131.7, 131.7, 131.2, 130.1, 123.7, 122.9, 120.2, 119.9, 119.8, 117.8, 117.3, 110.5, 55.2, 51.7, 50.6, 38.7, 18.6; **HRMS-ESI** (+)  $m/z$ : Calcd for  $\text{C}_{27}\text{H}_{20}\text{BrN}_2\text{O}_4$  [ $\text{M}+\text{H}^+$ ], 515.0601; found, 515.0624.

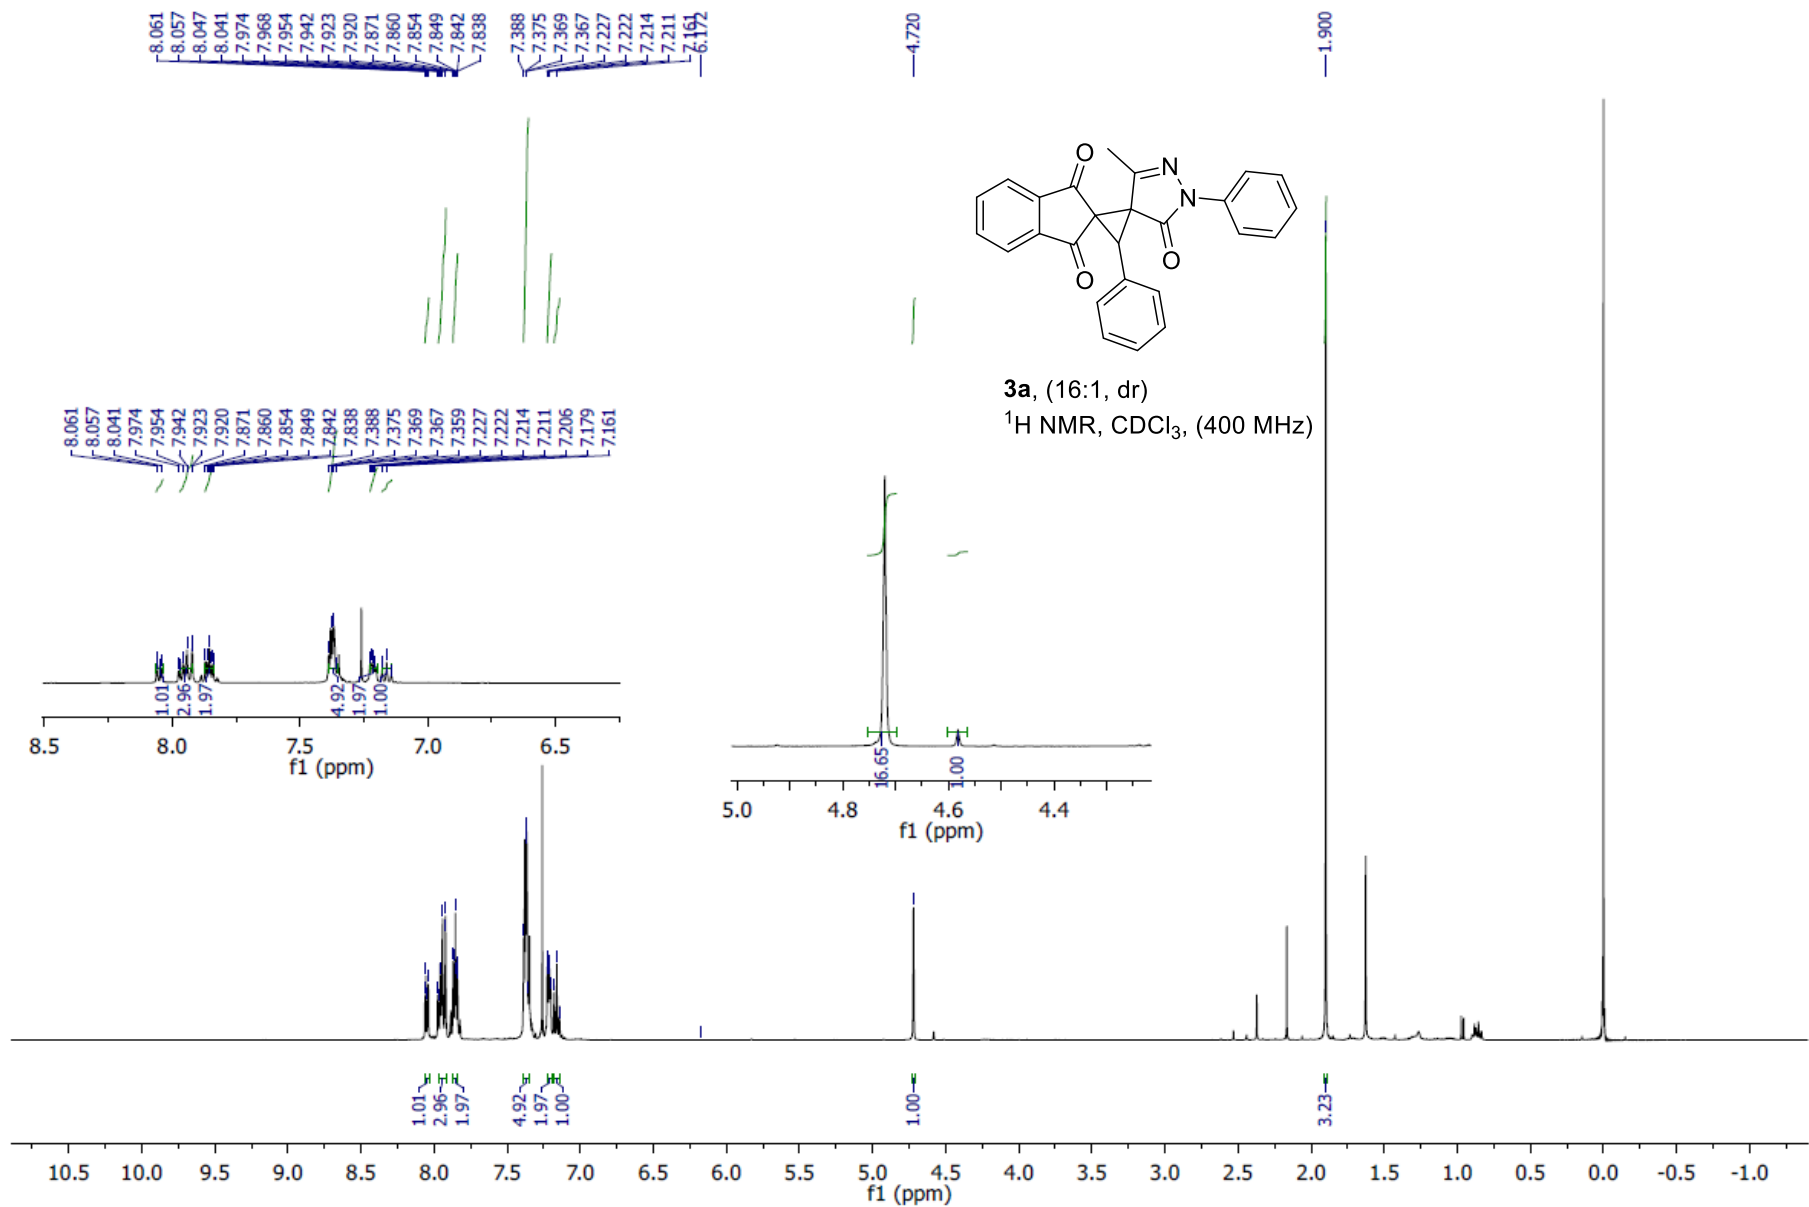

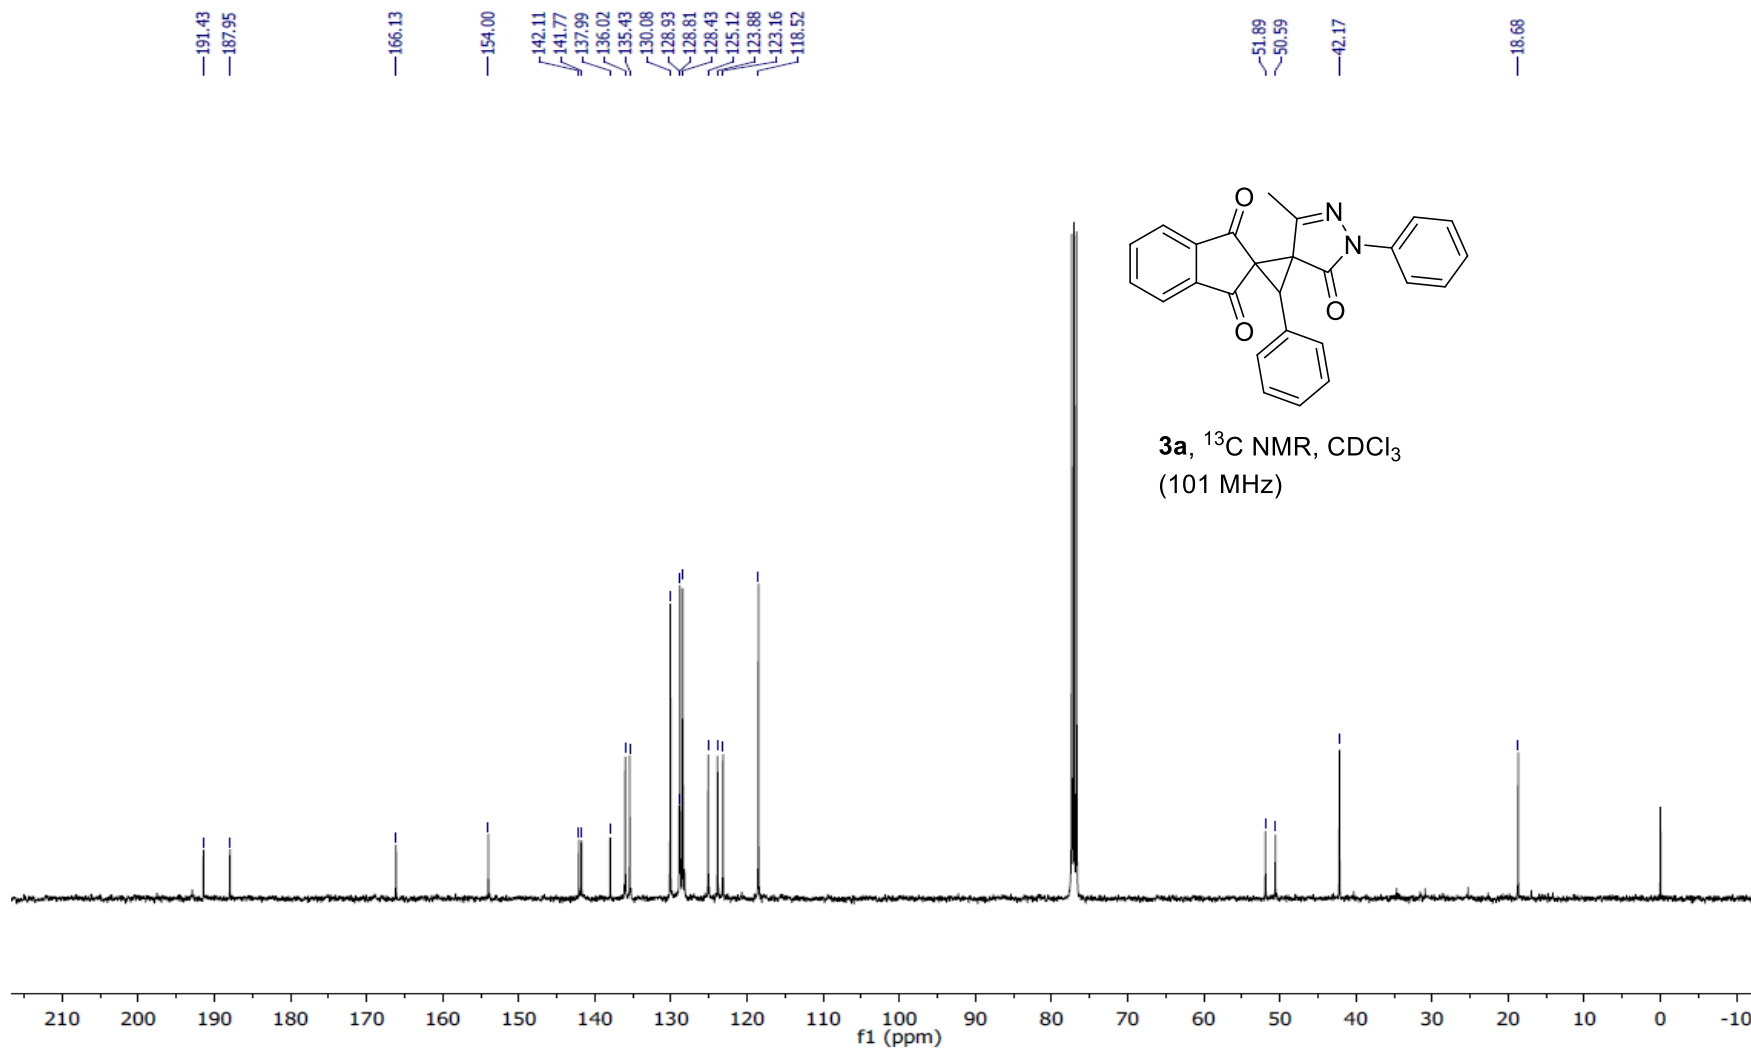

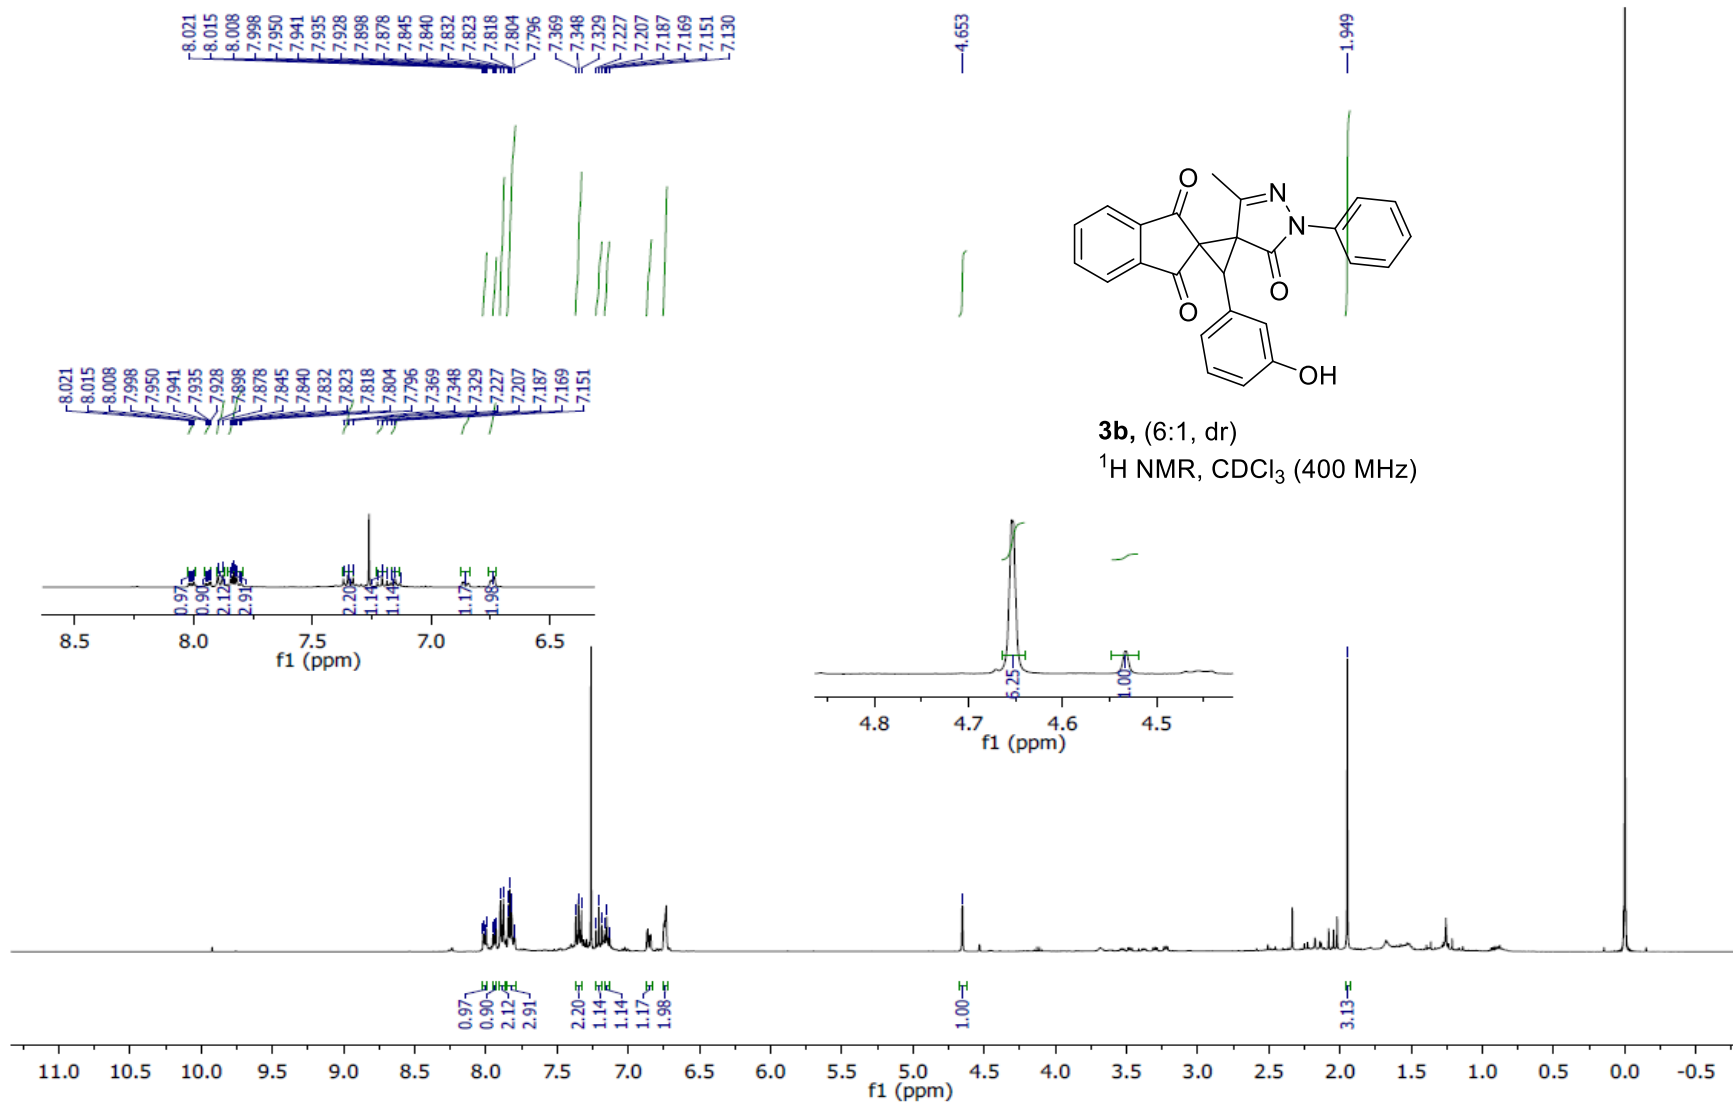

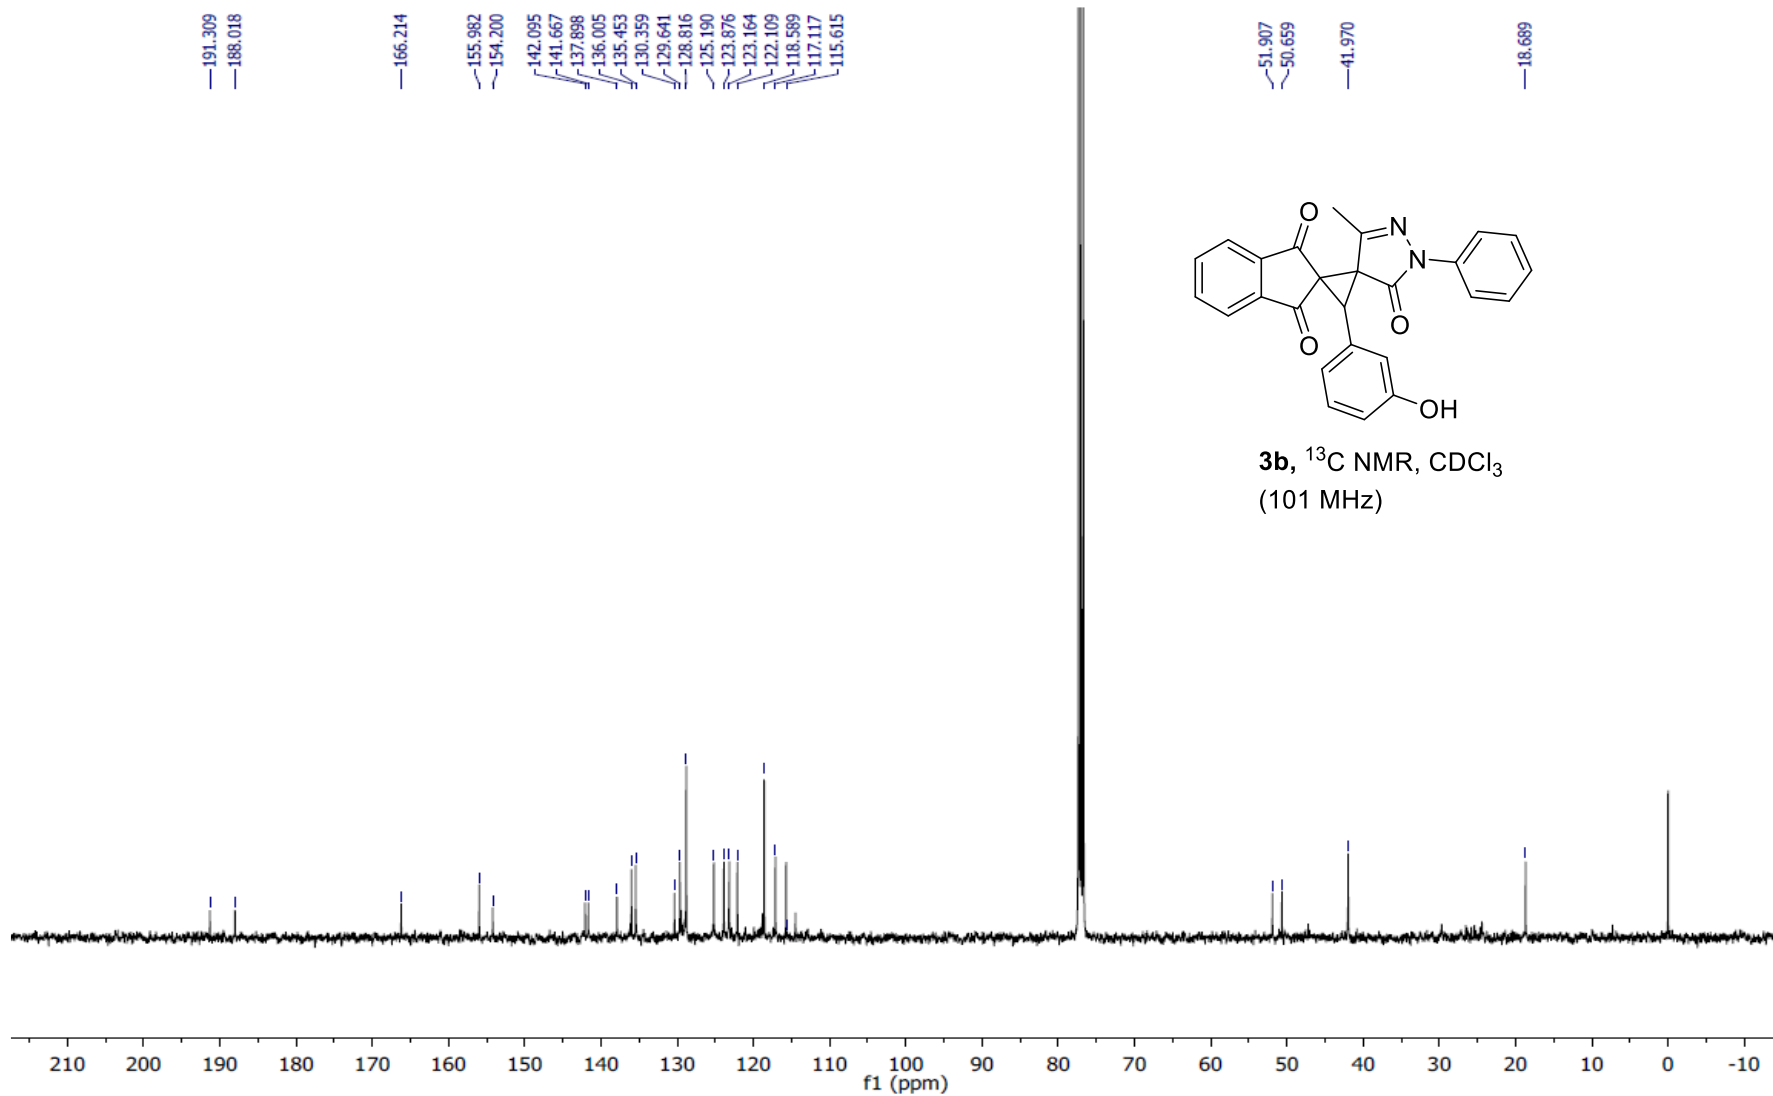

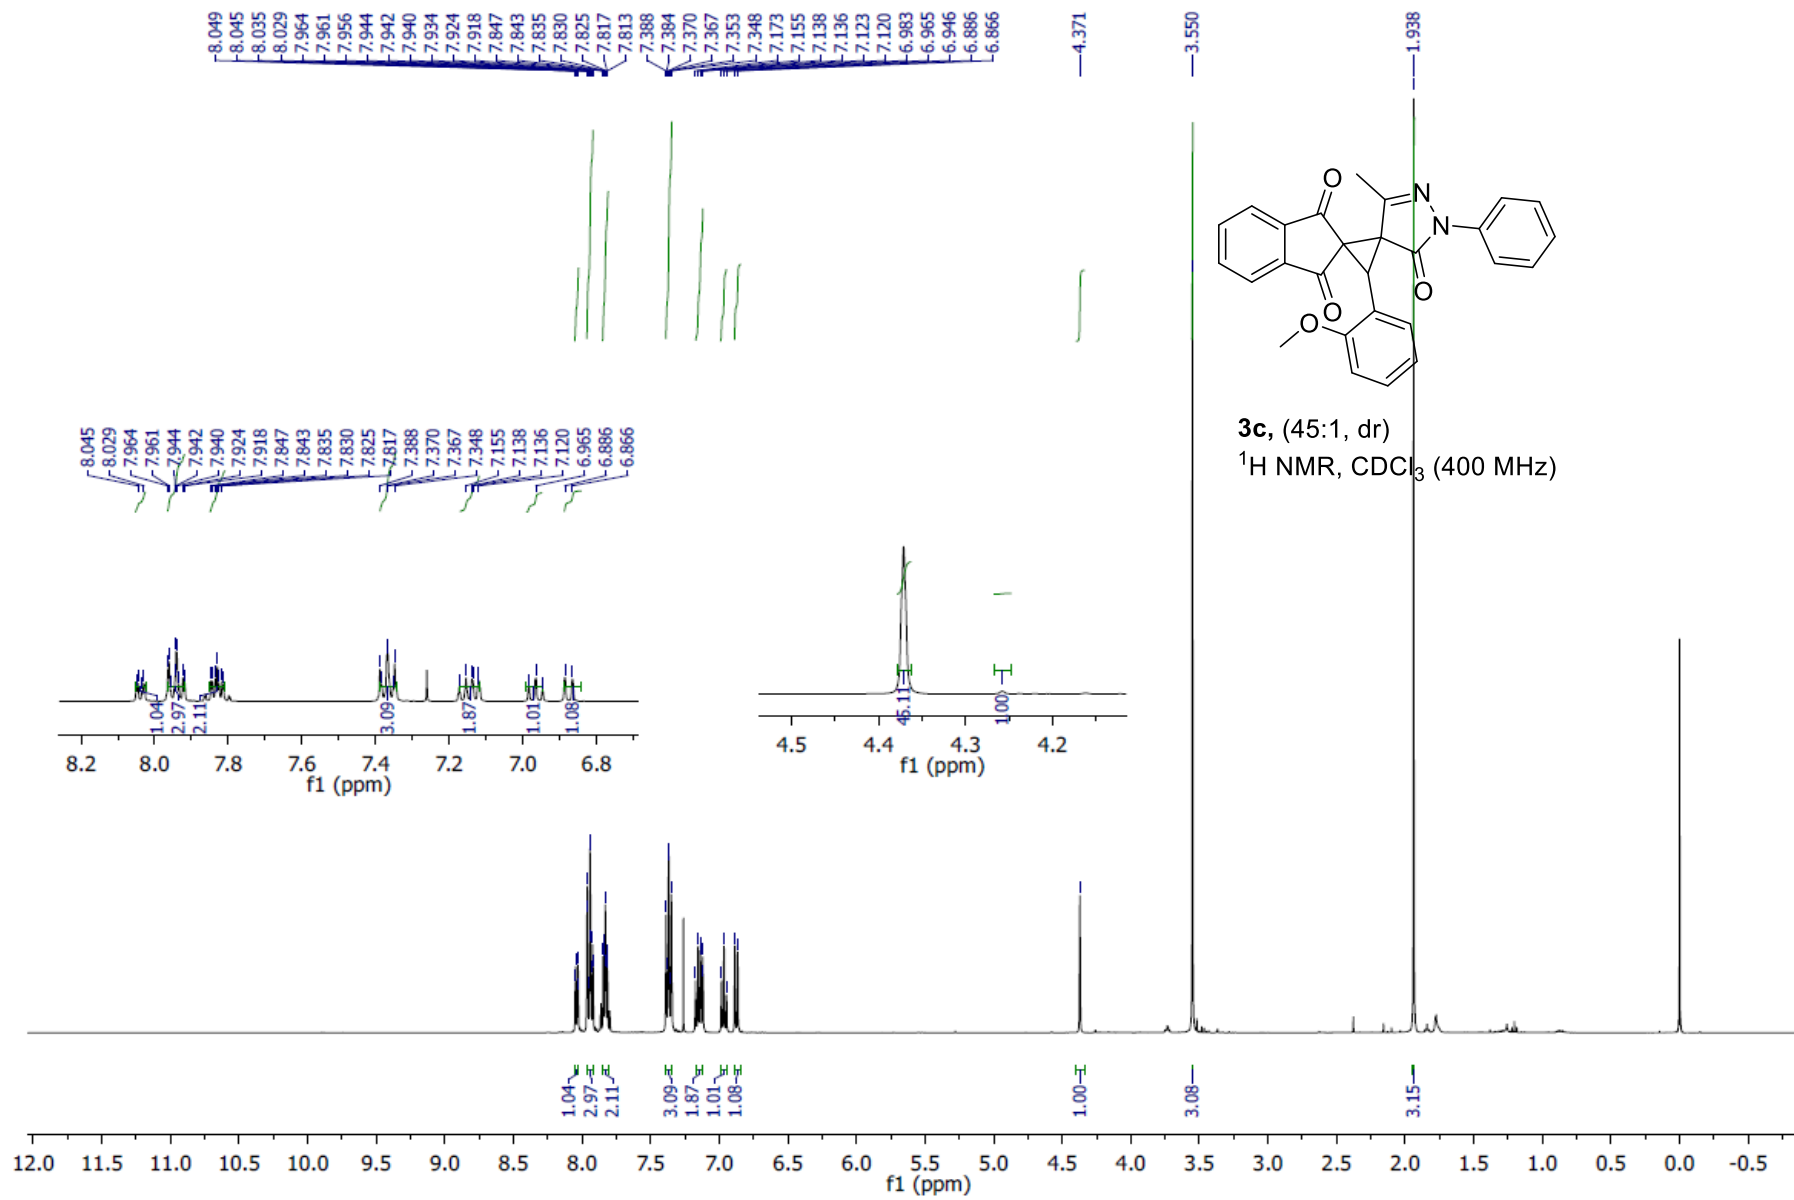



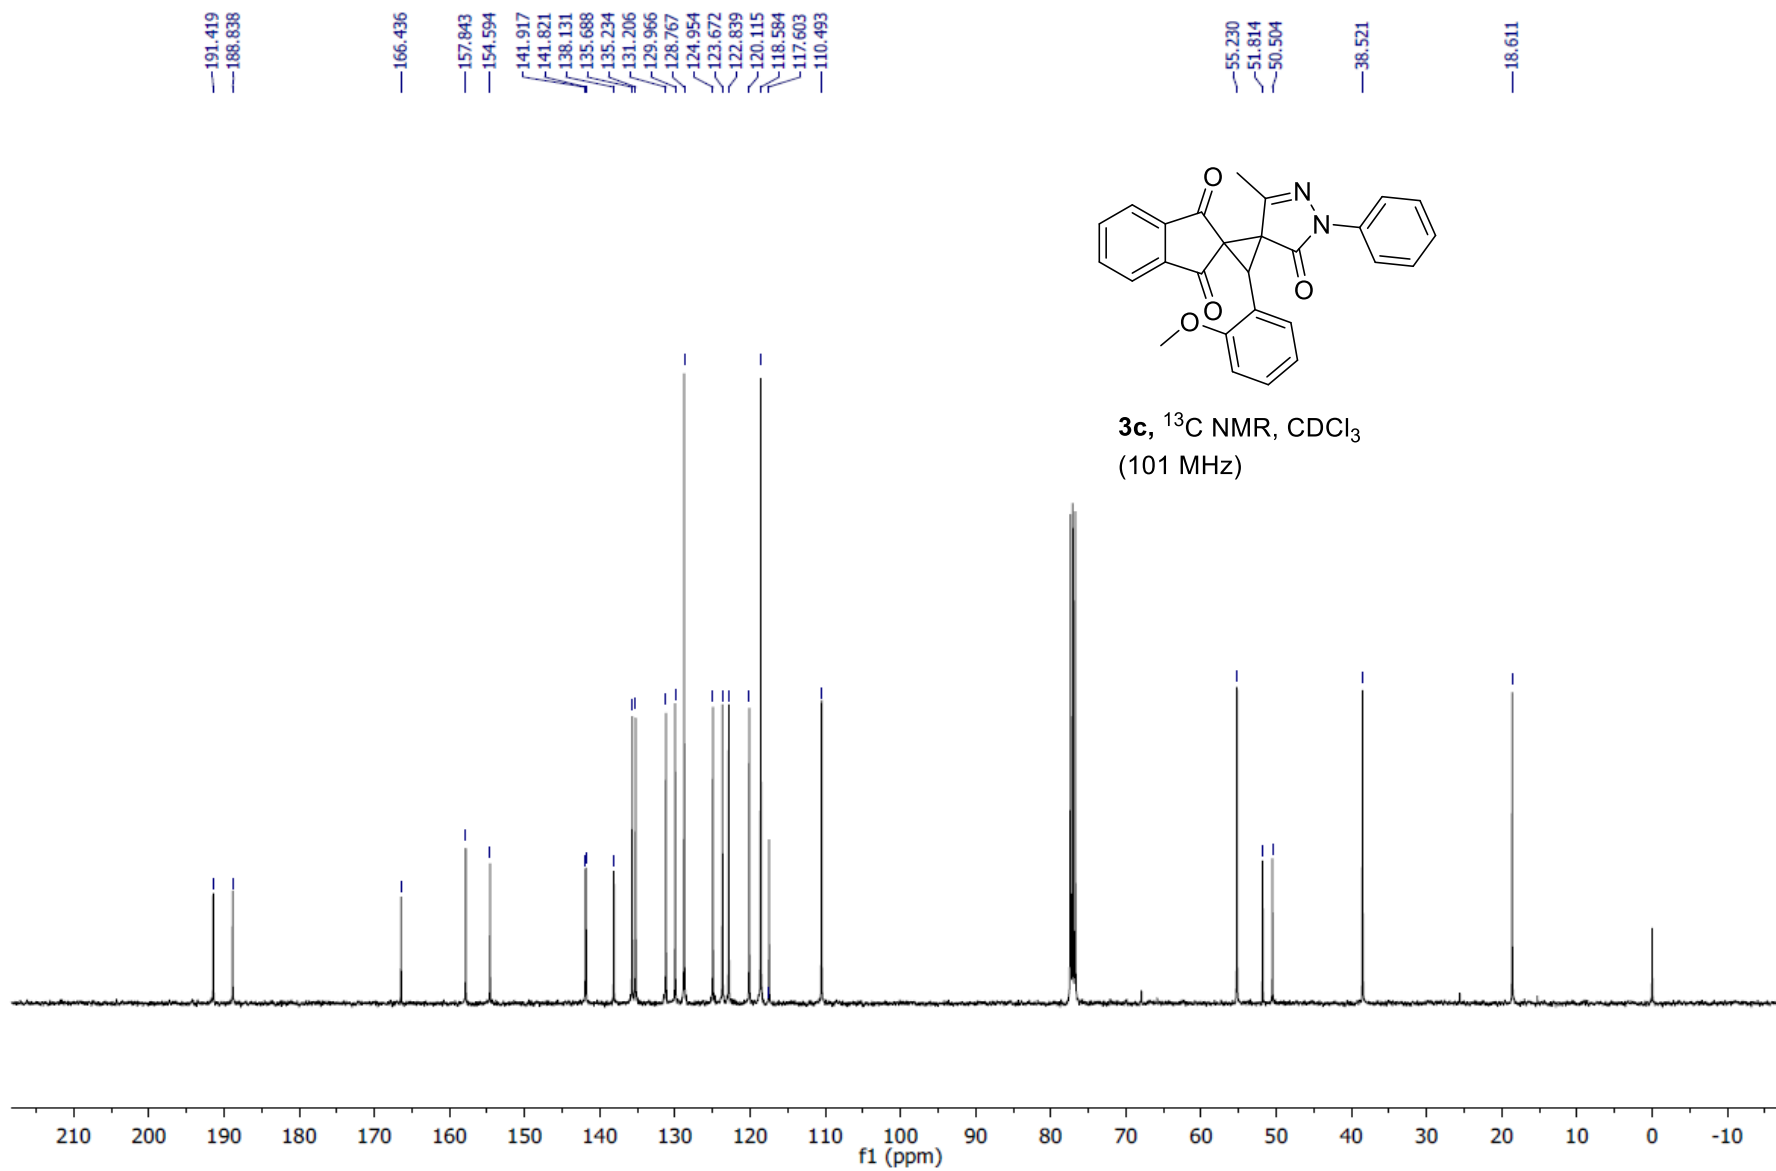

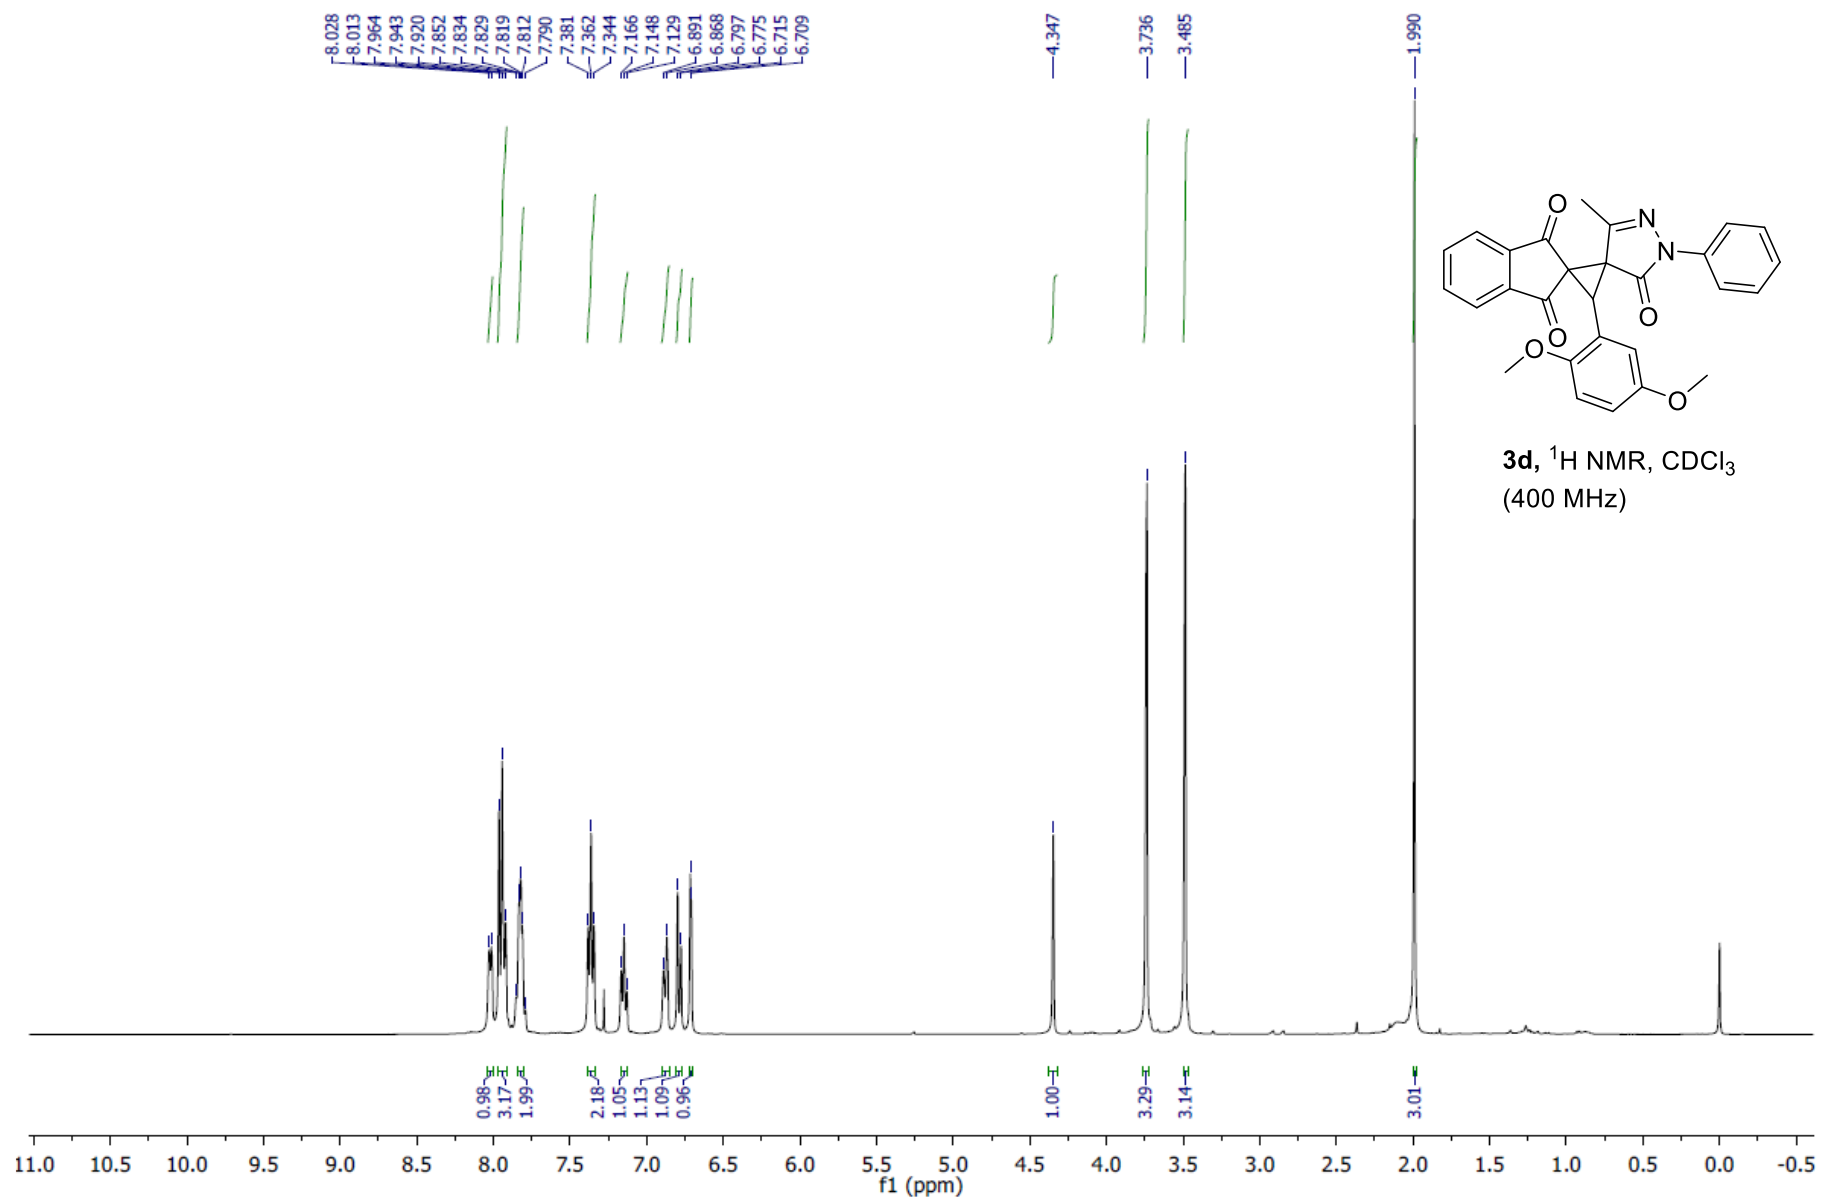

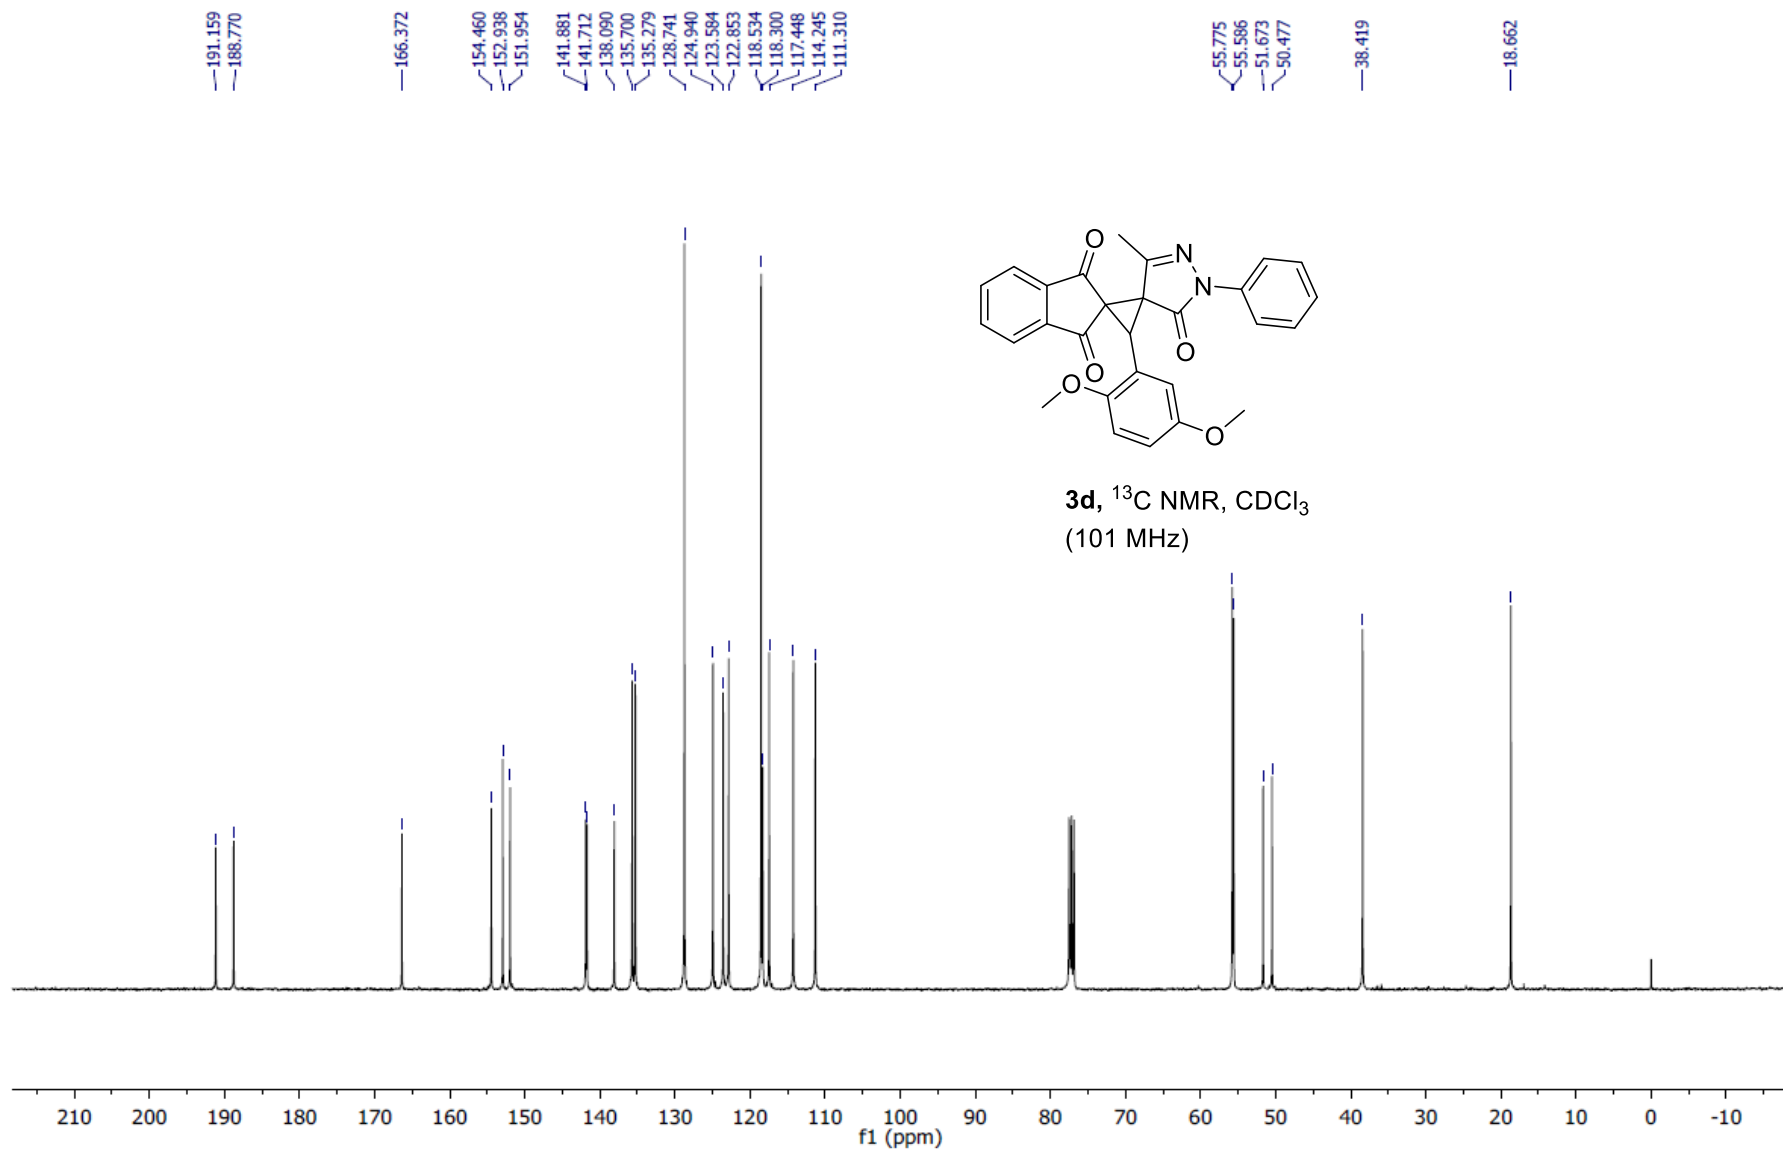

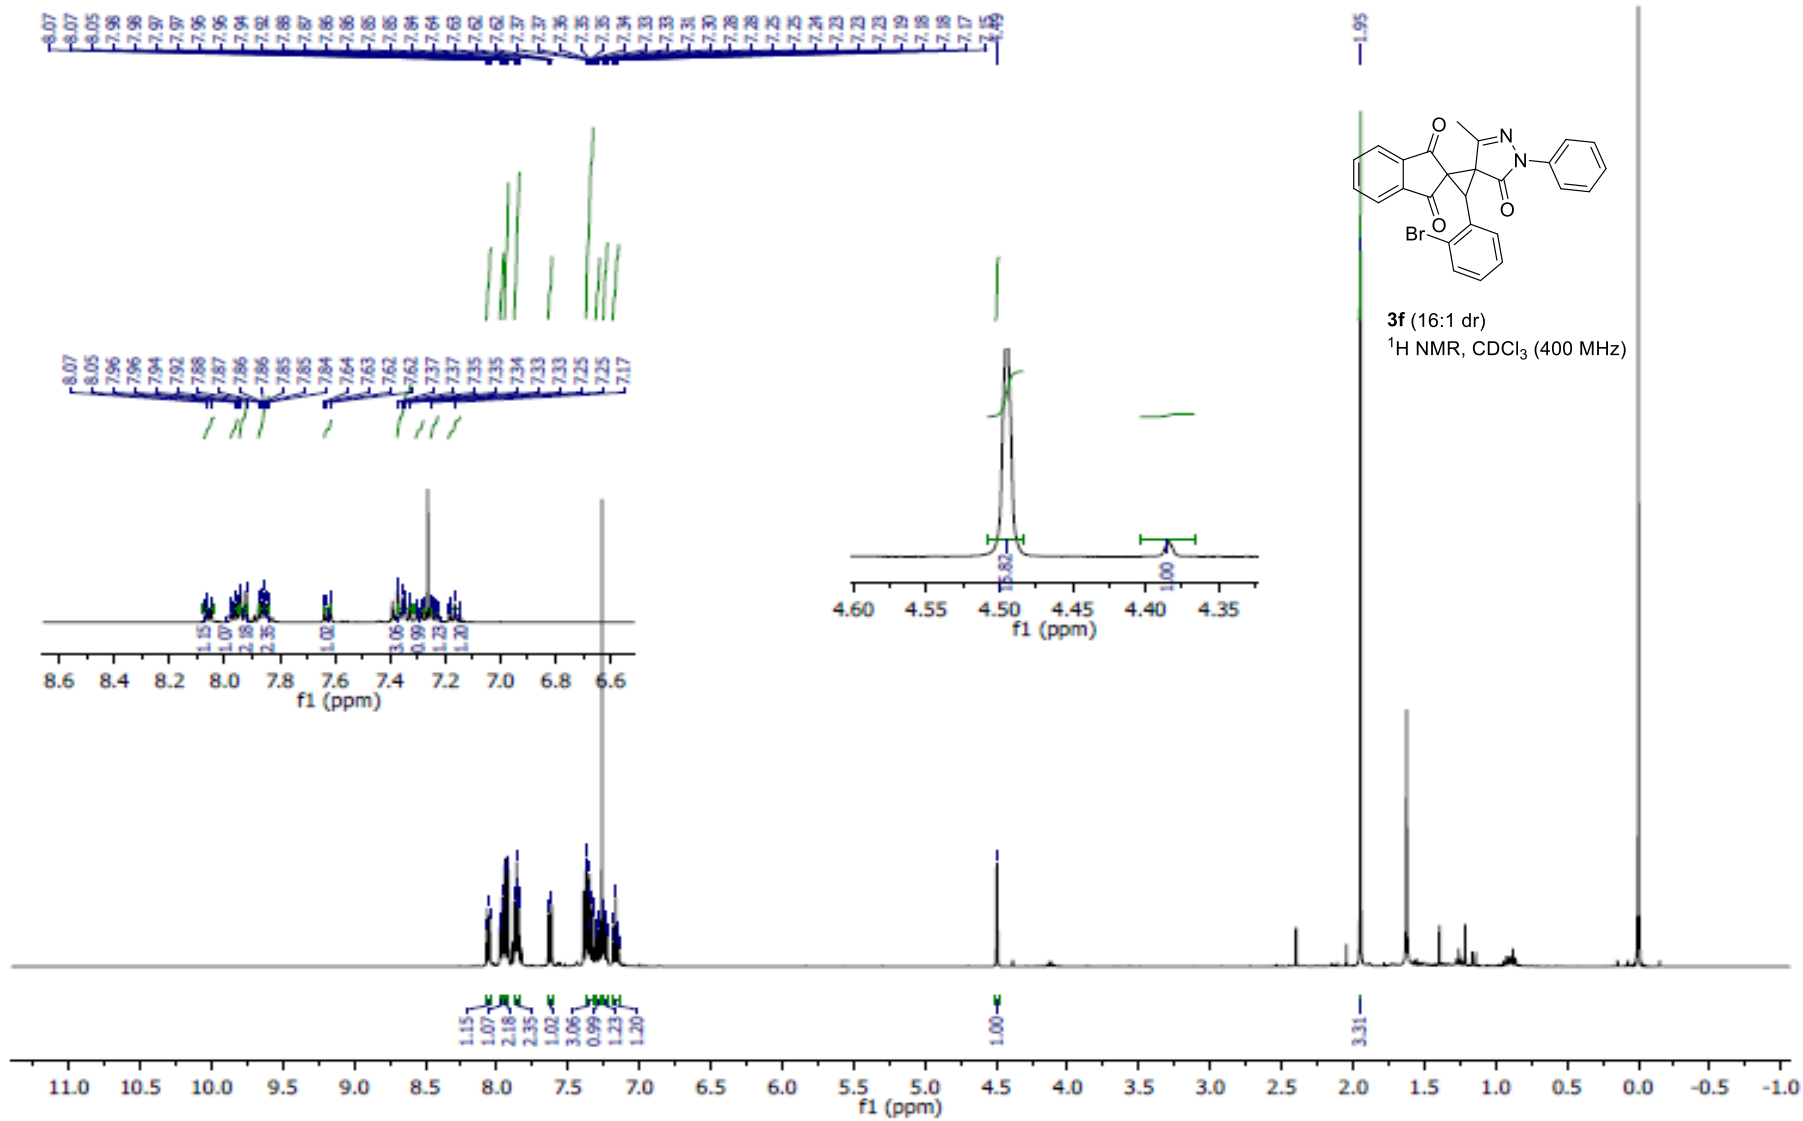

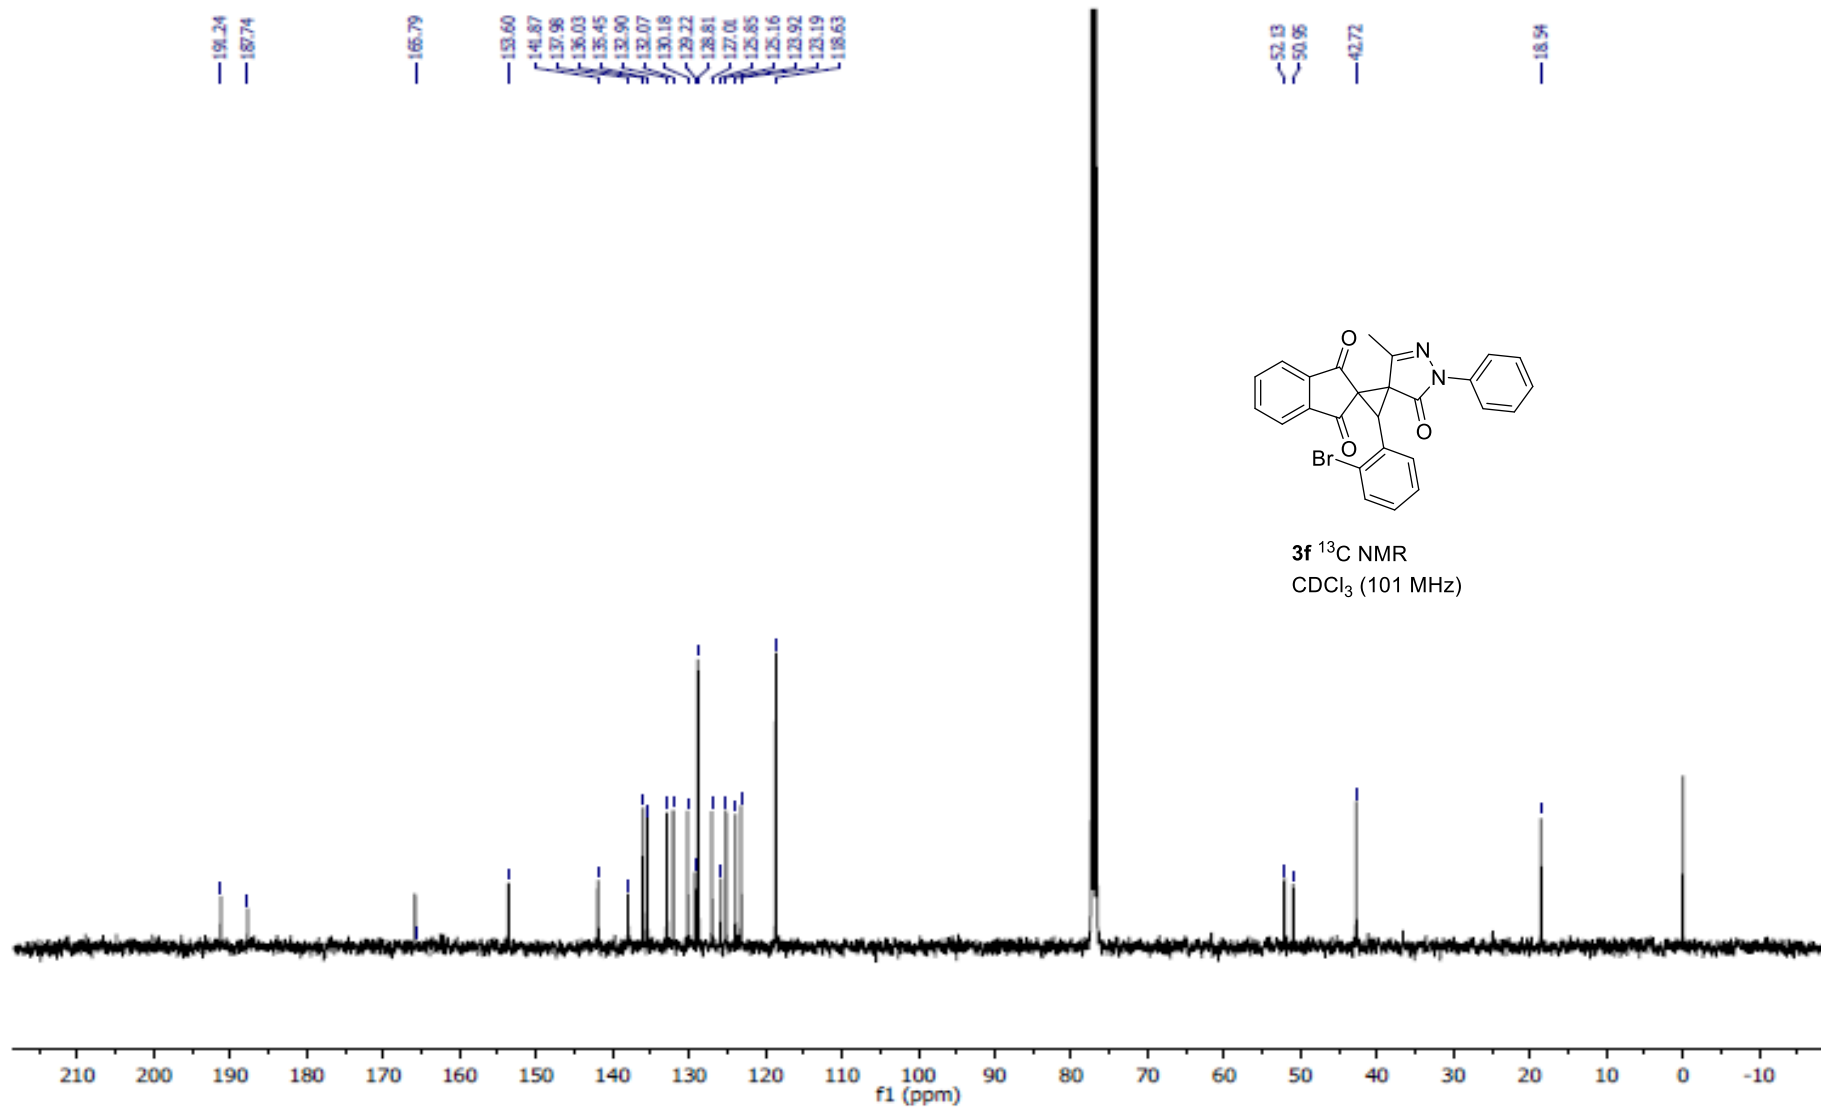

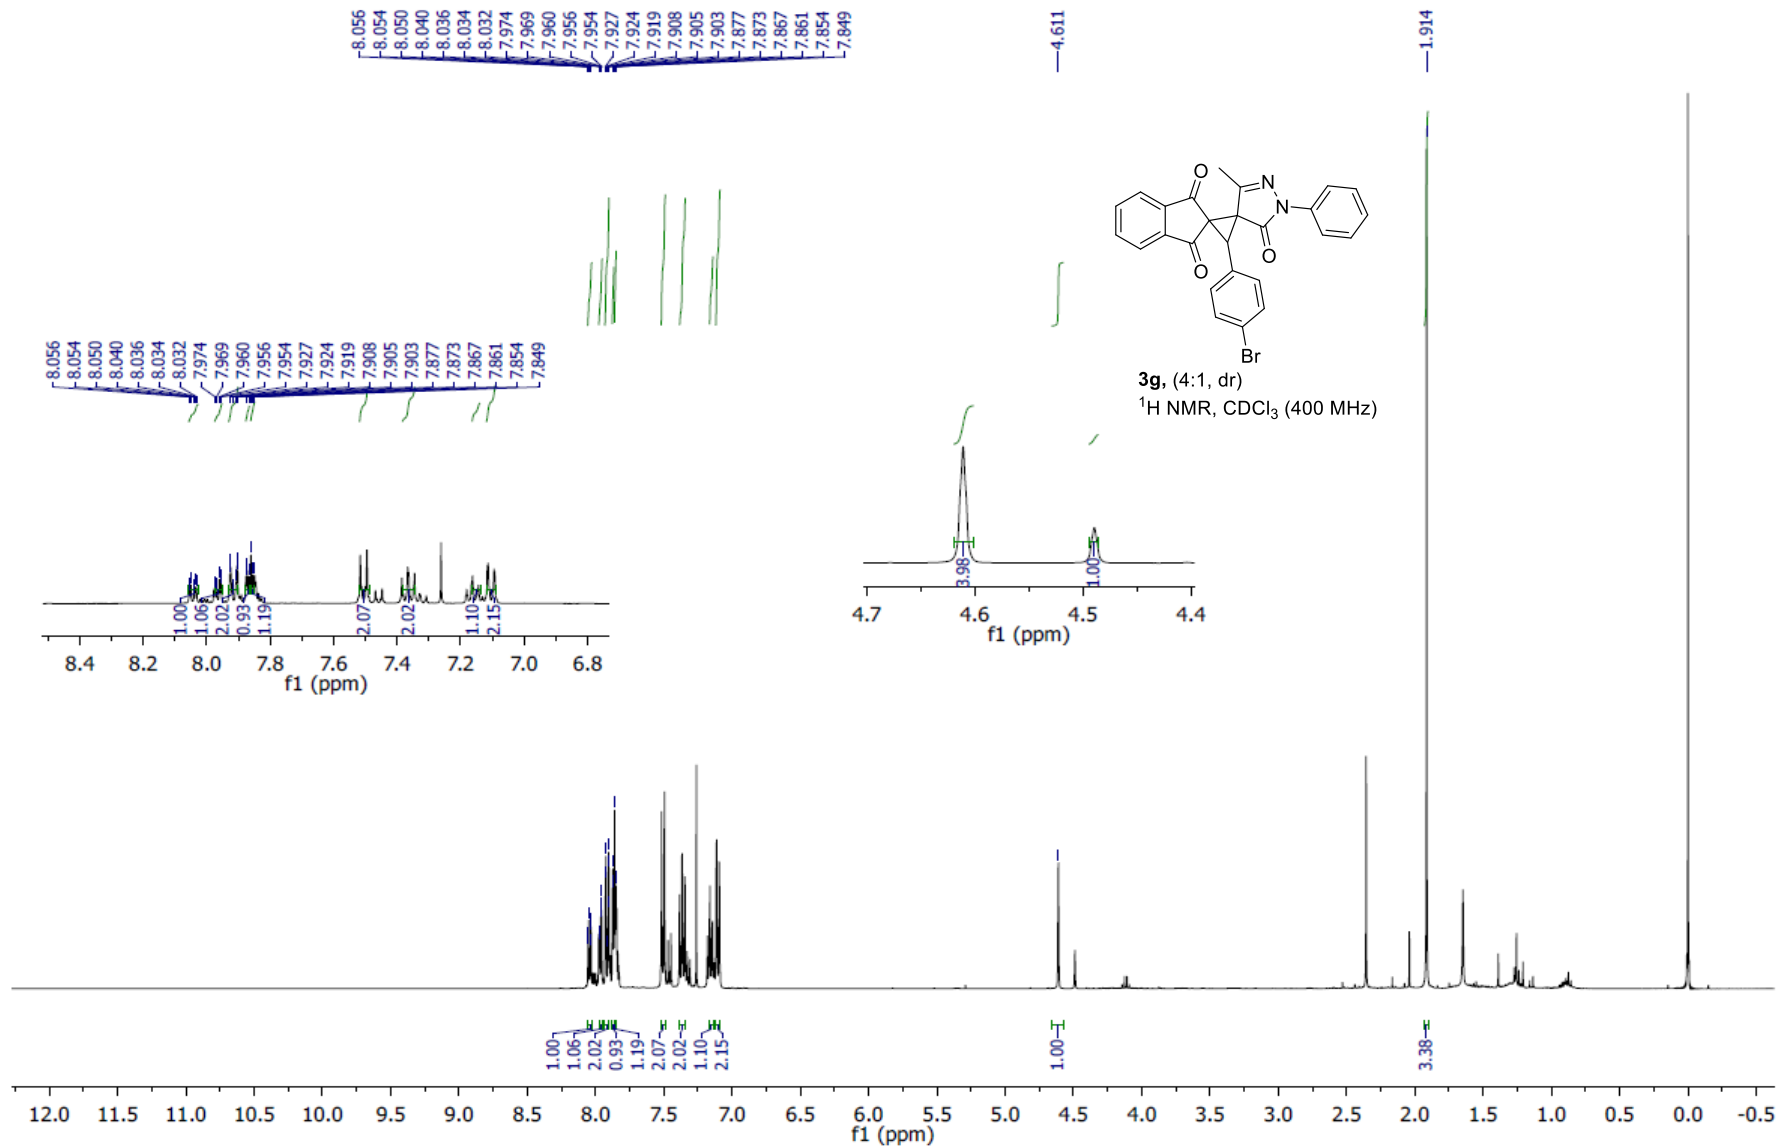

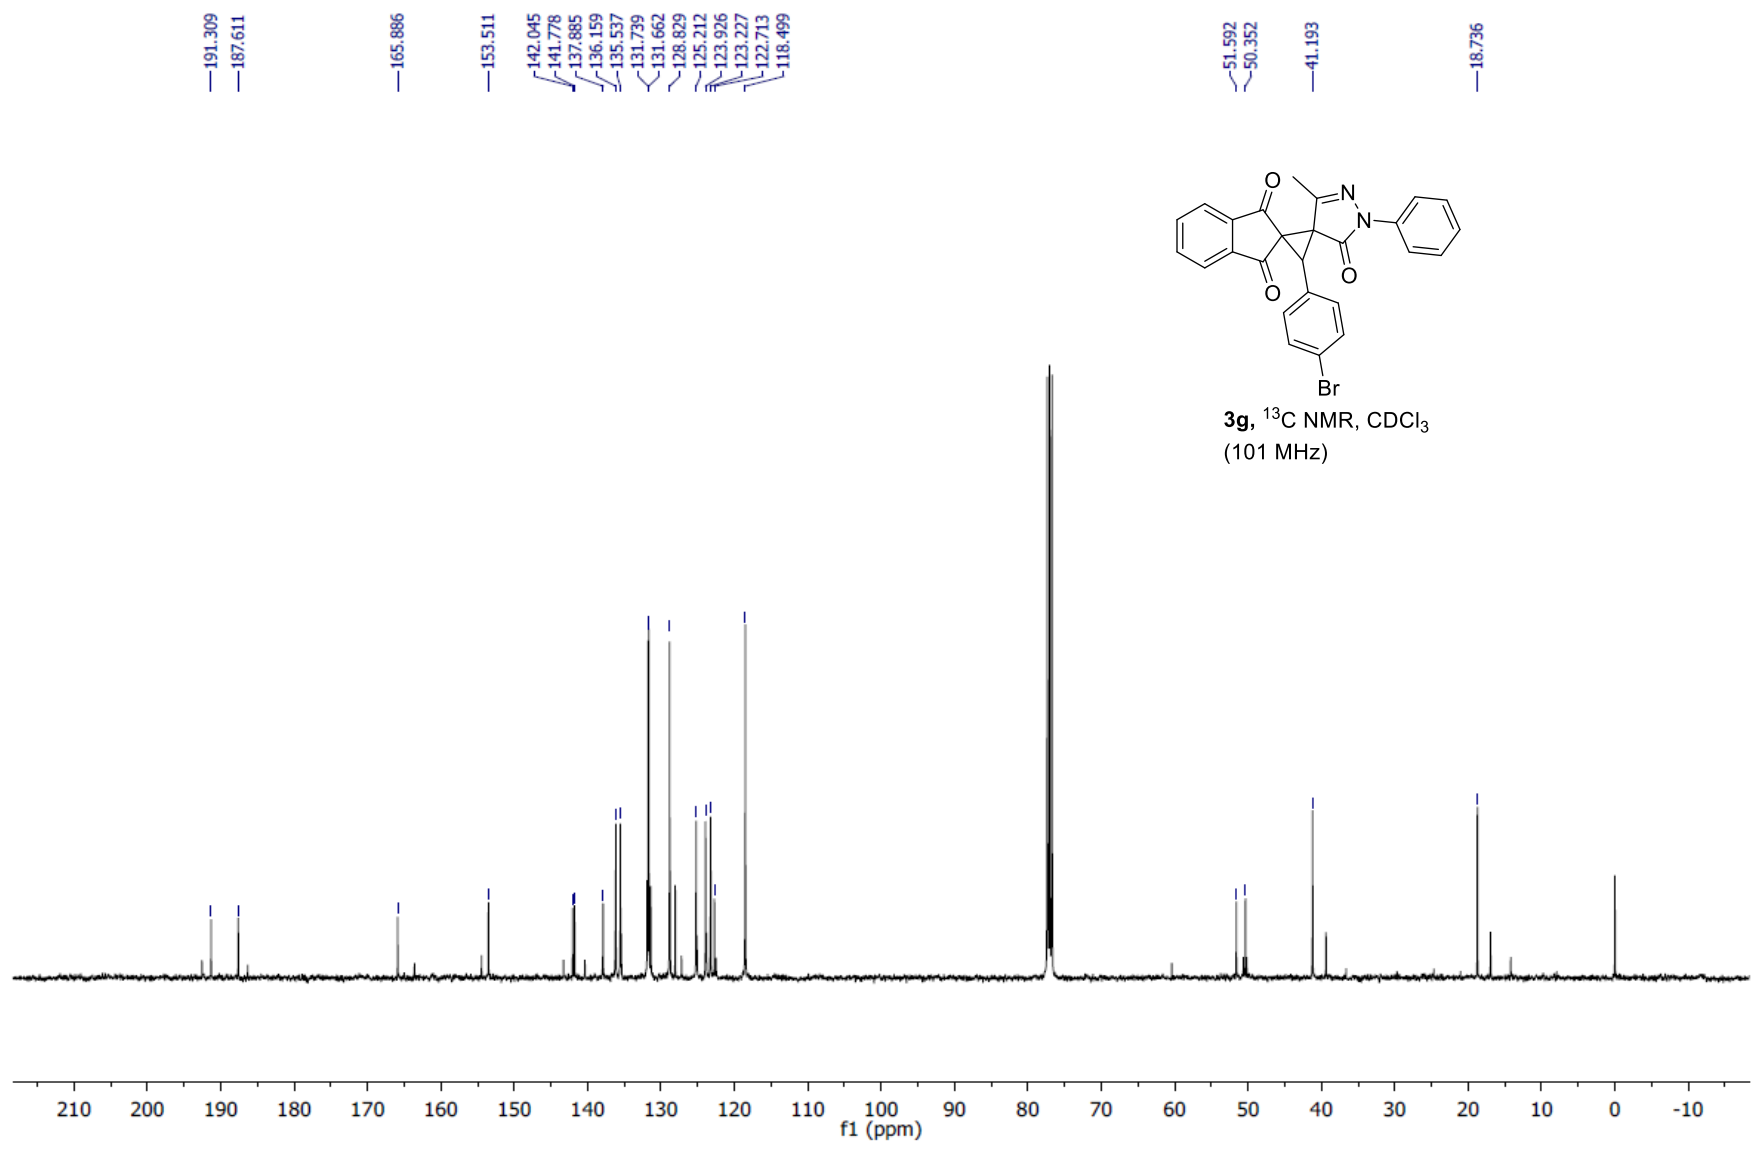

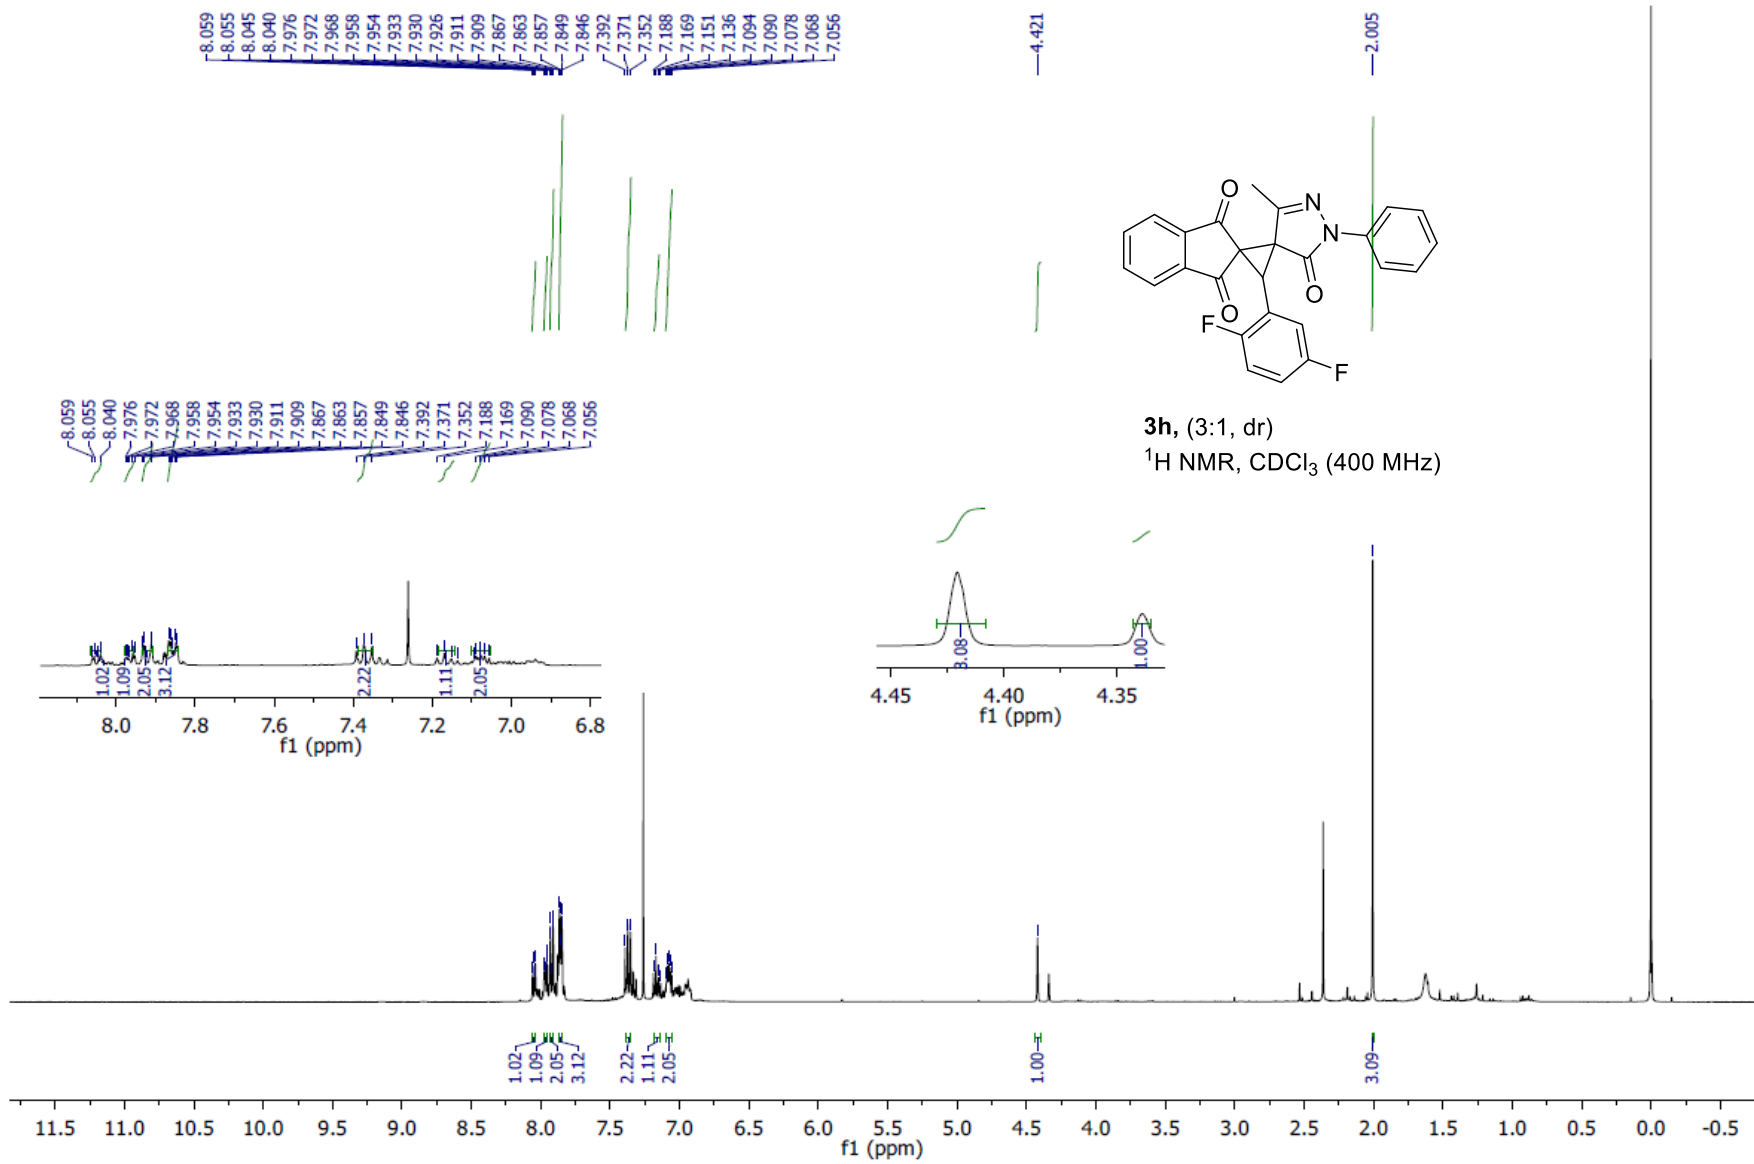



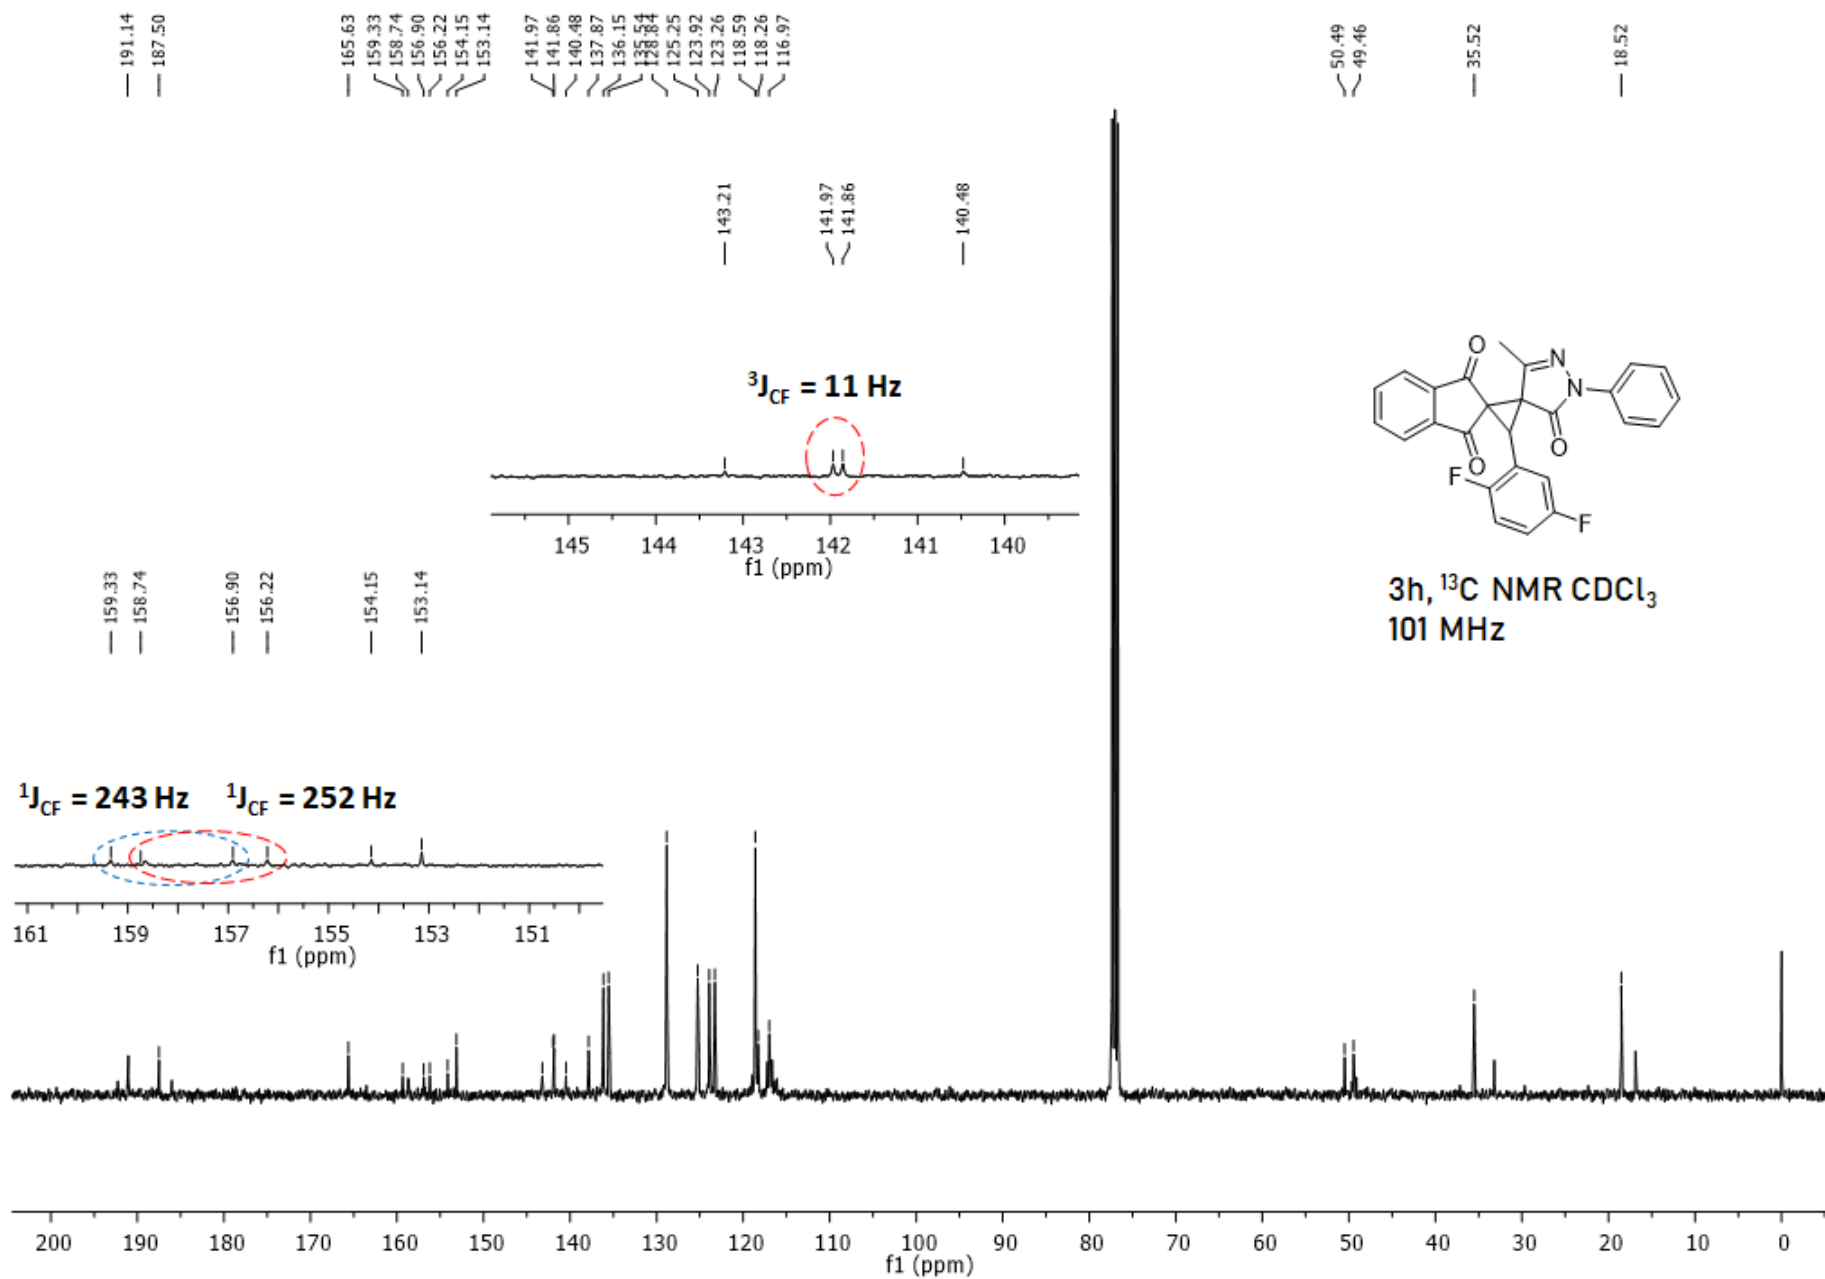

-116.31  
-116.80

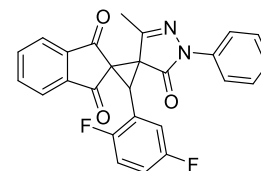

**3h**, <sup>19</sup>F NMR  
377 MHz (CDCl<sub>3</sub>)

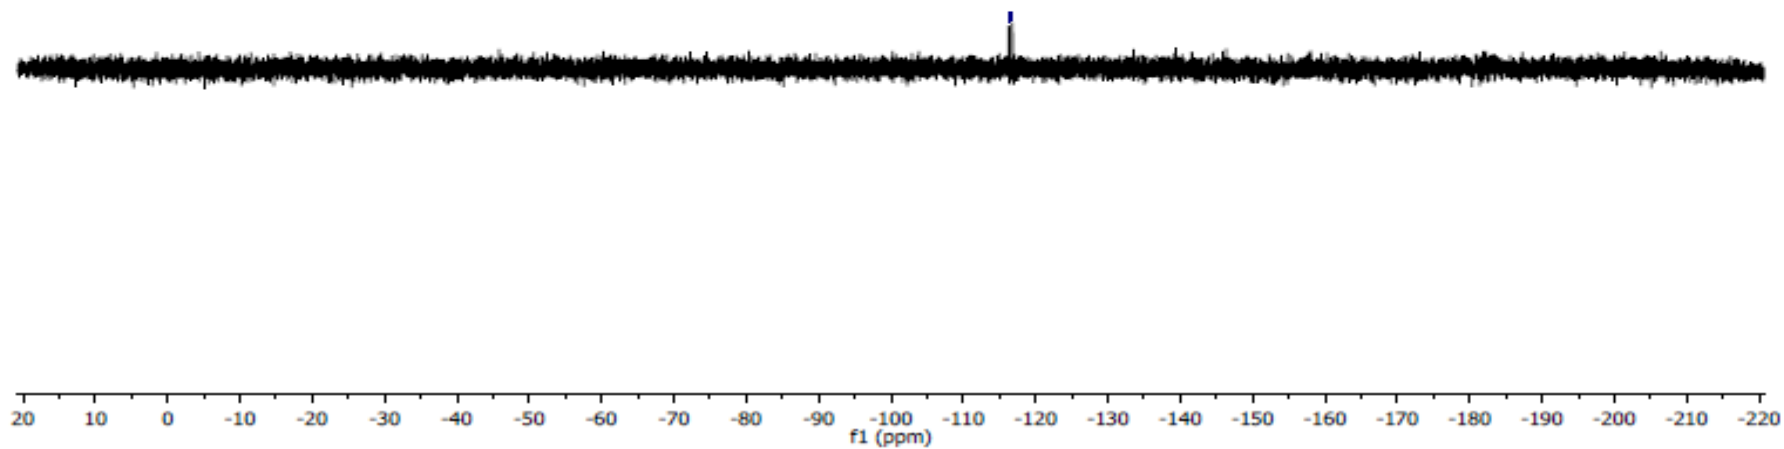

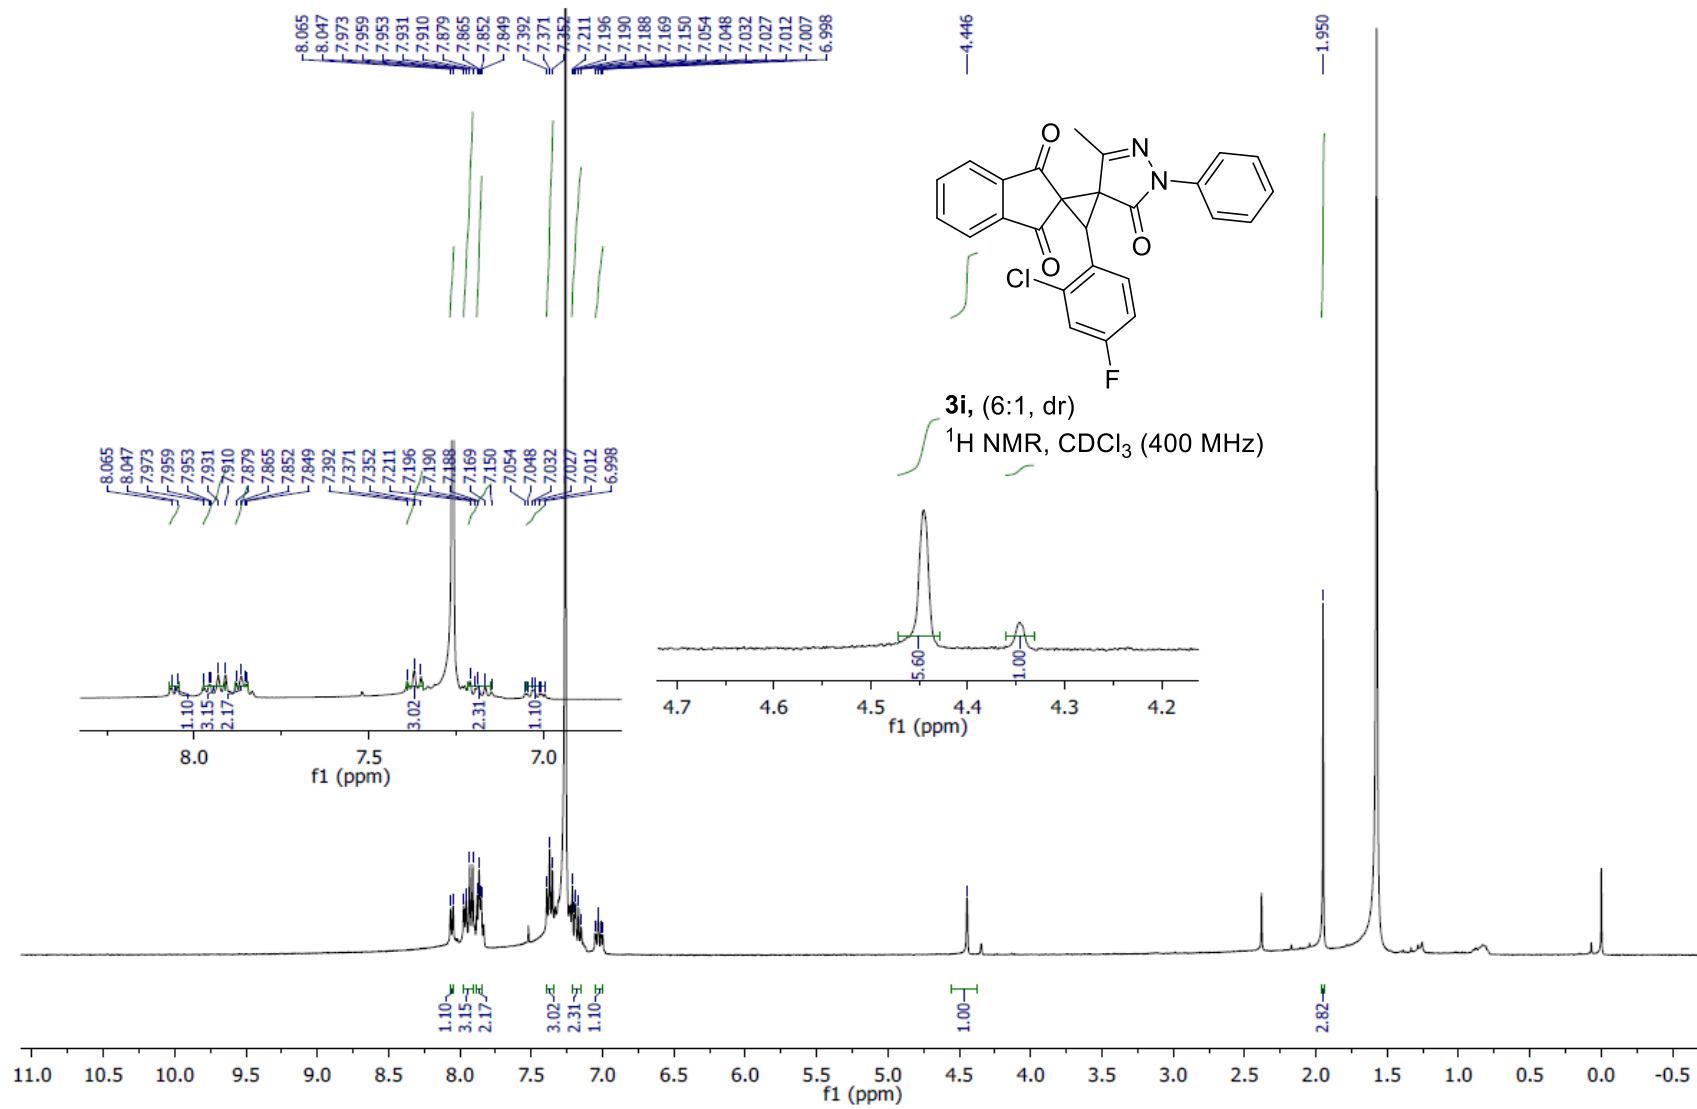

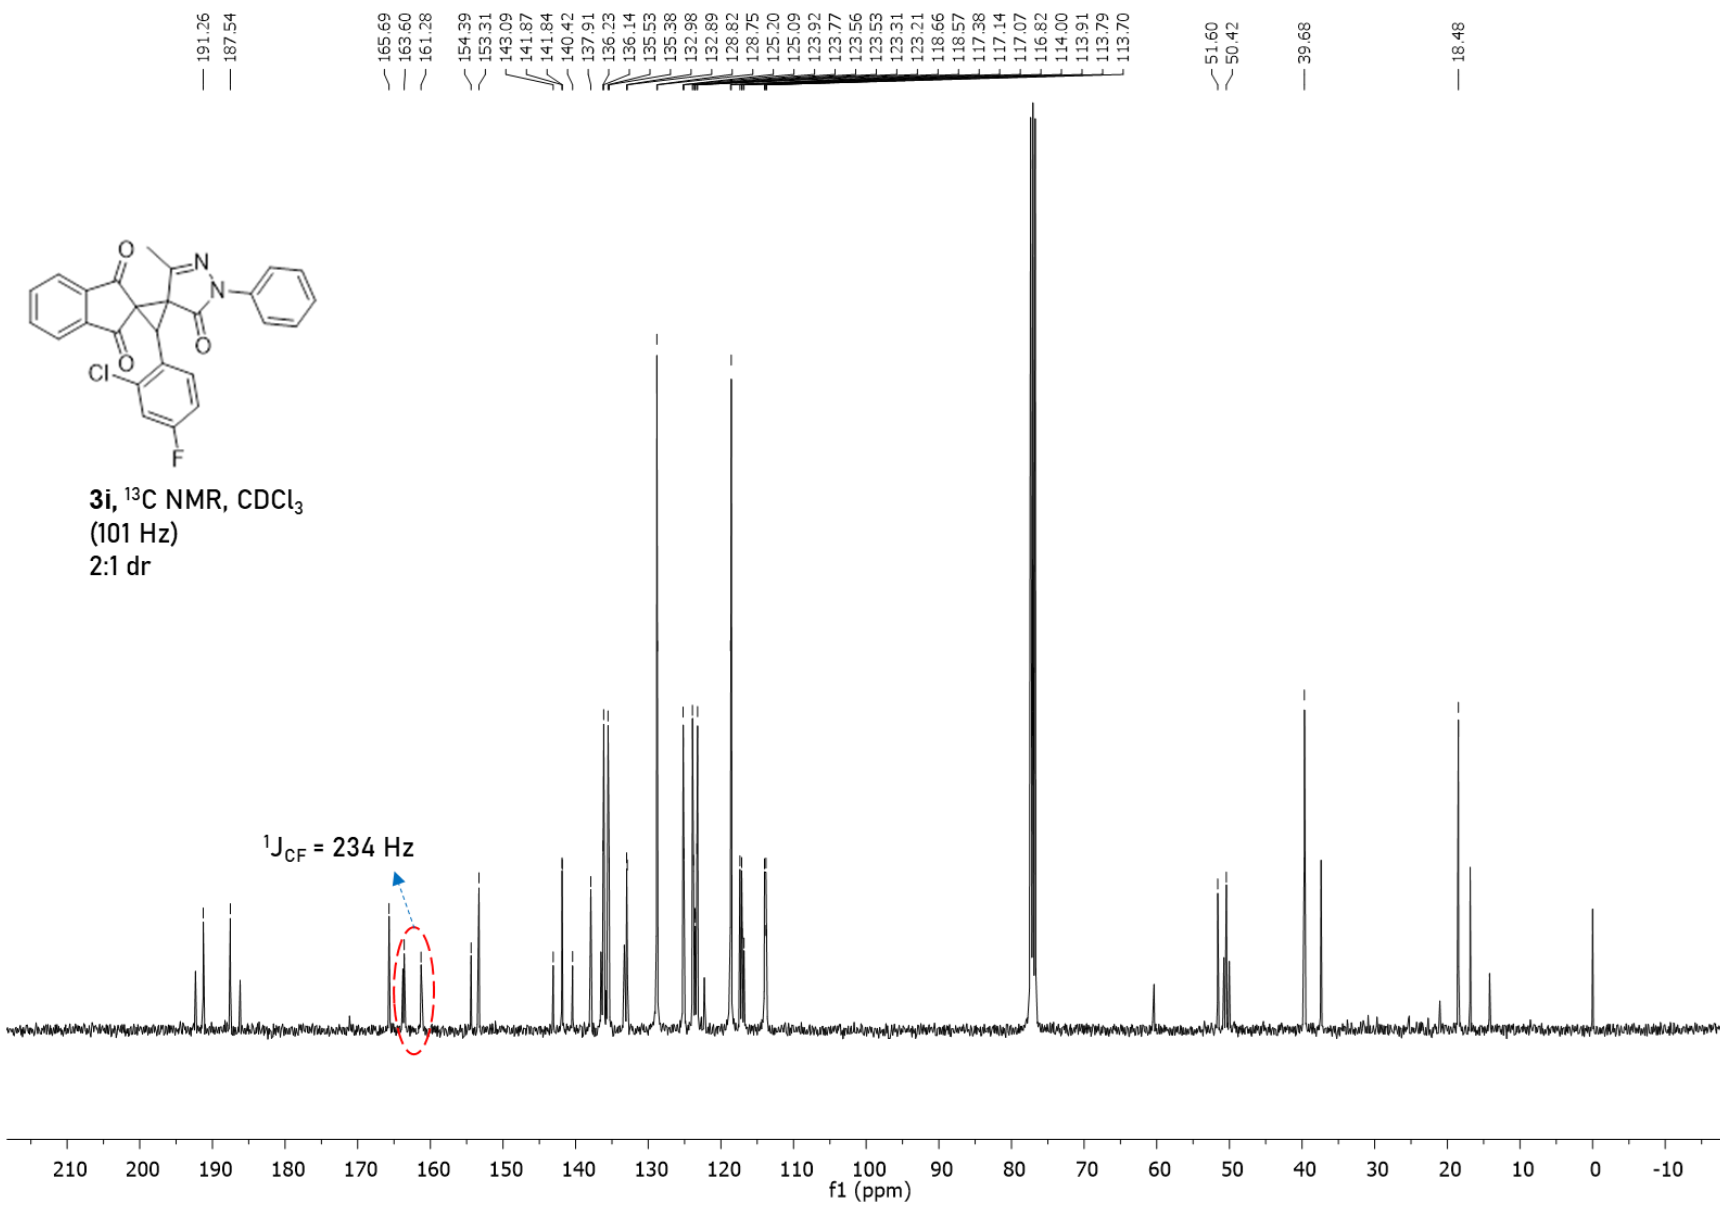

-109.99

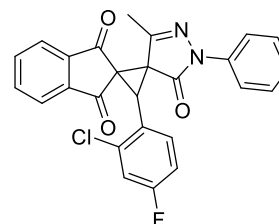

**3i**,  $^{19}\text{F}$  NMR,  $\text{CDCl}_3$   
(377 MHz)

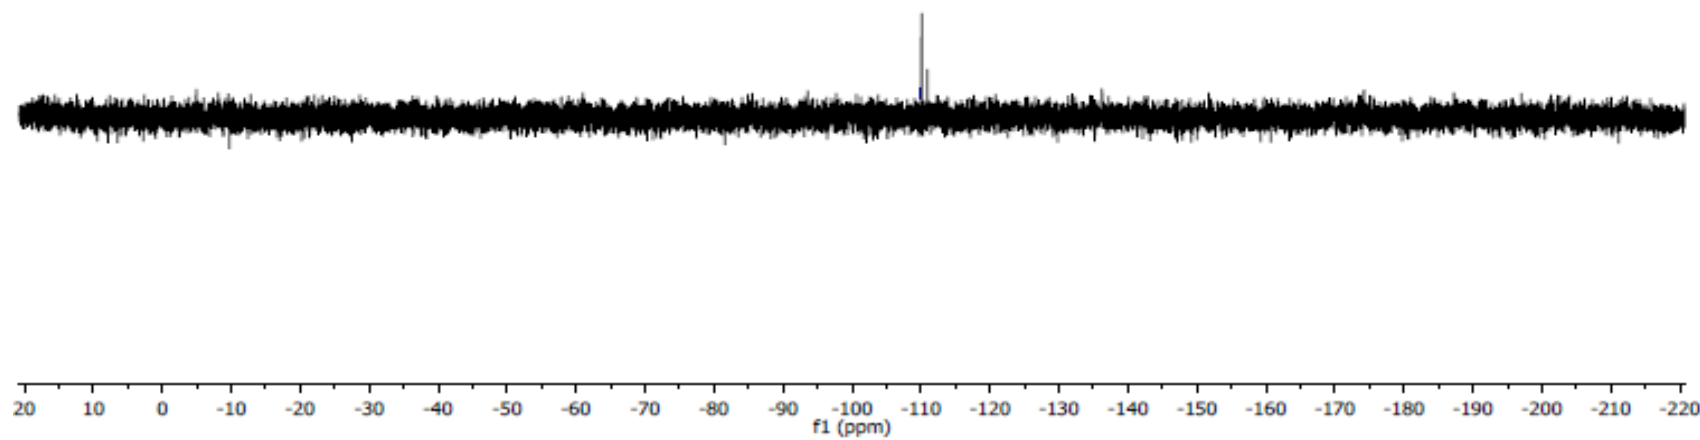

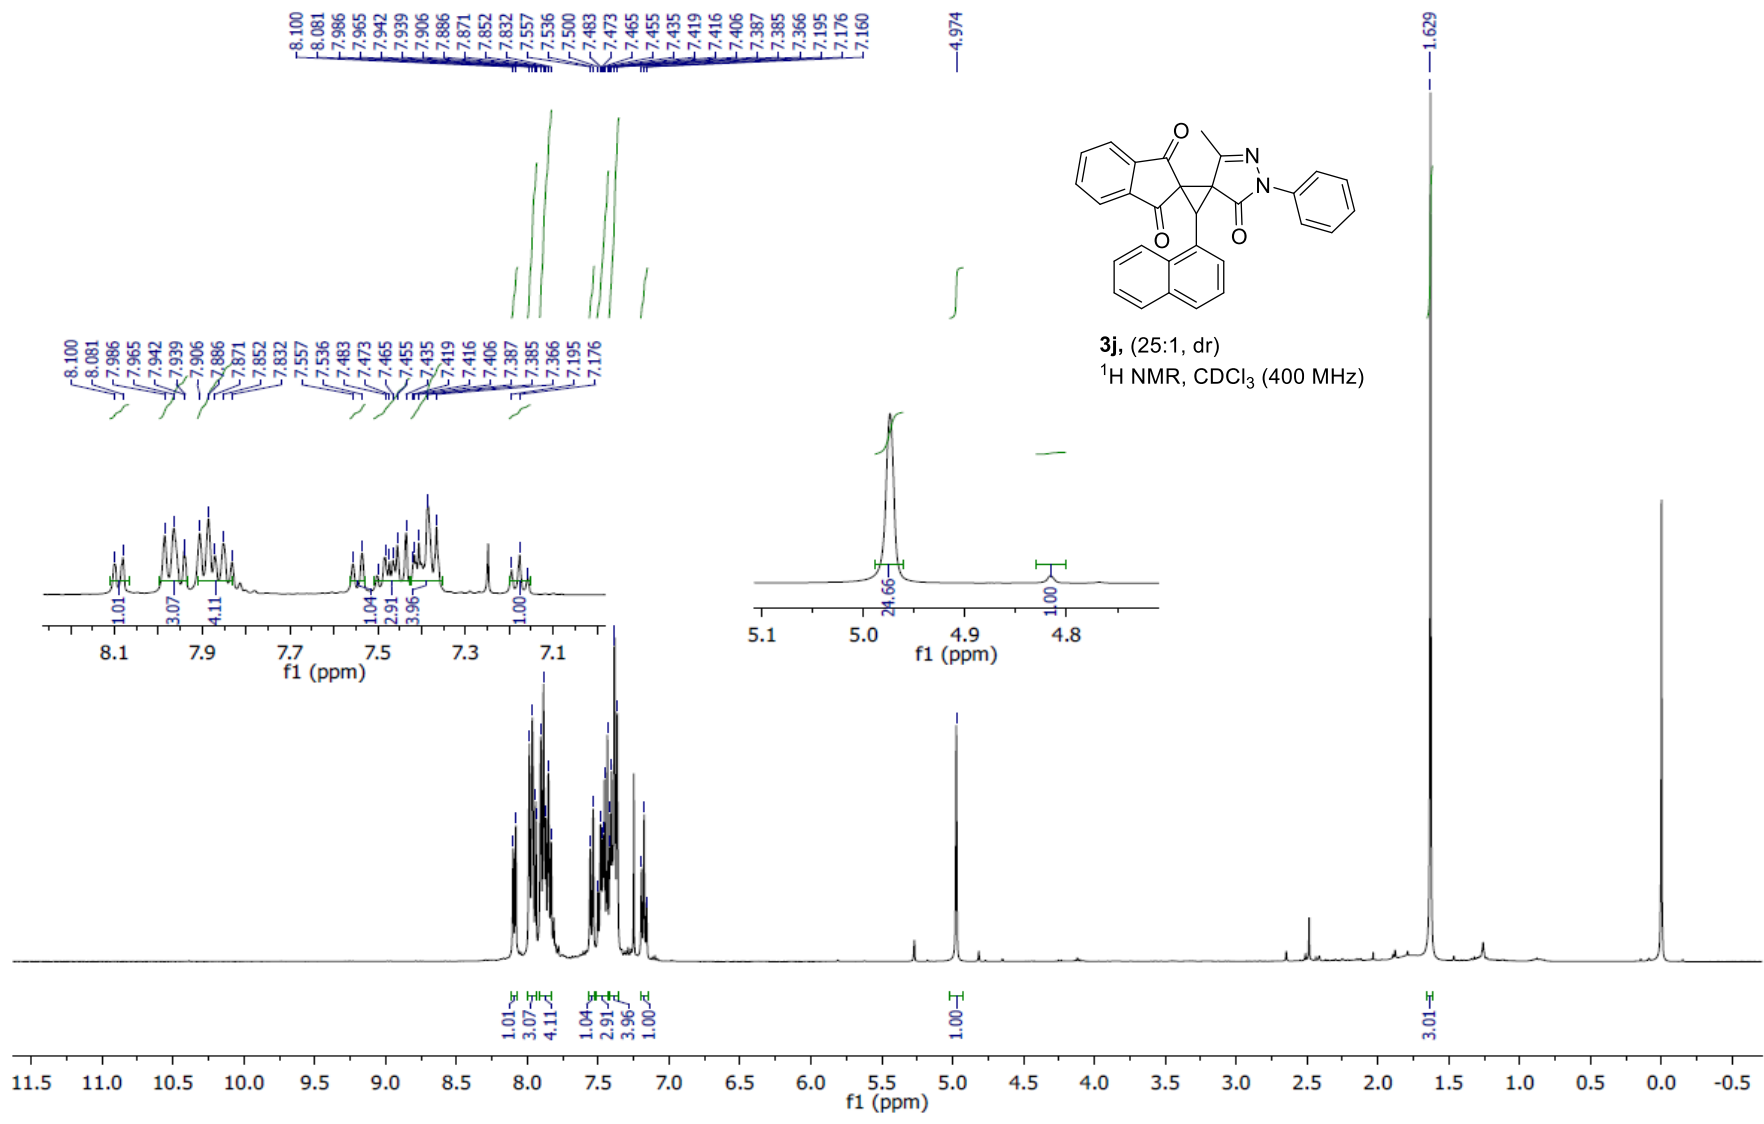

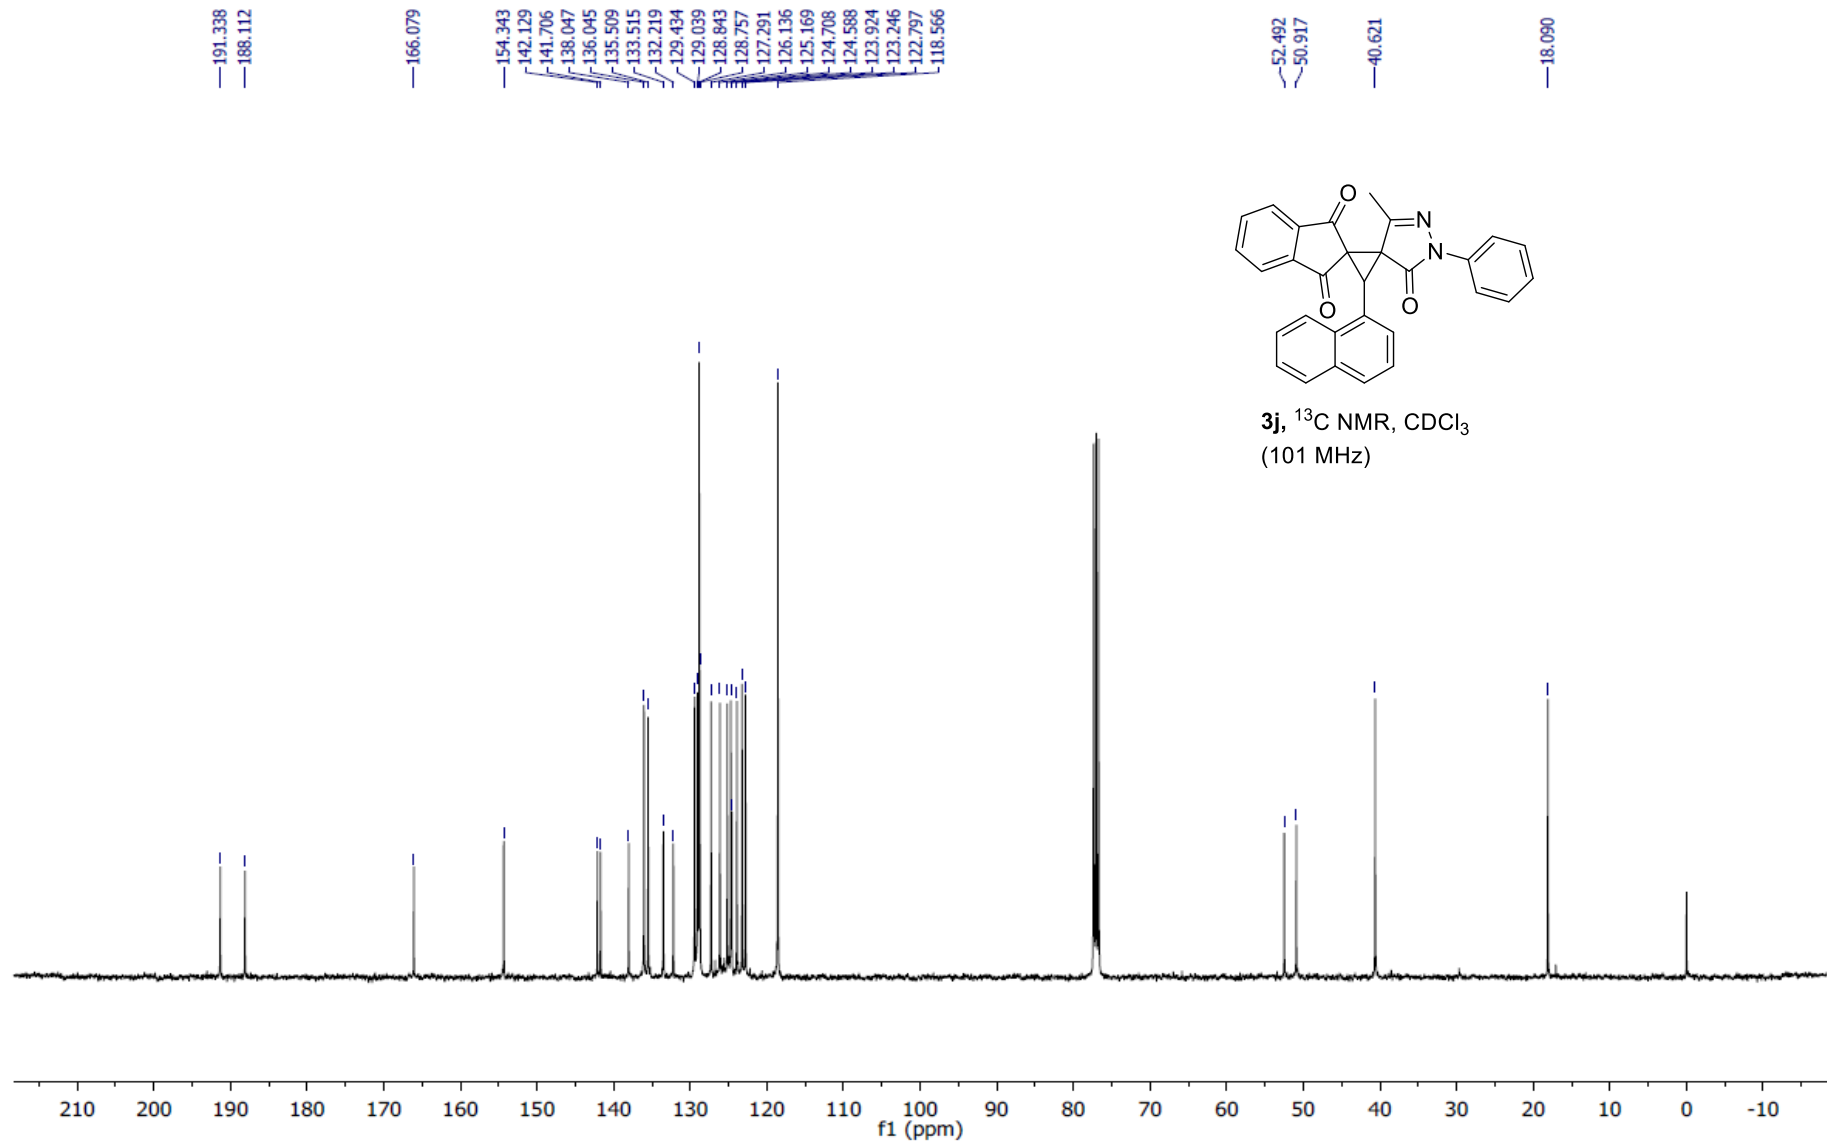

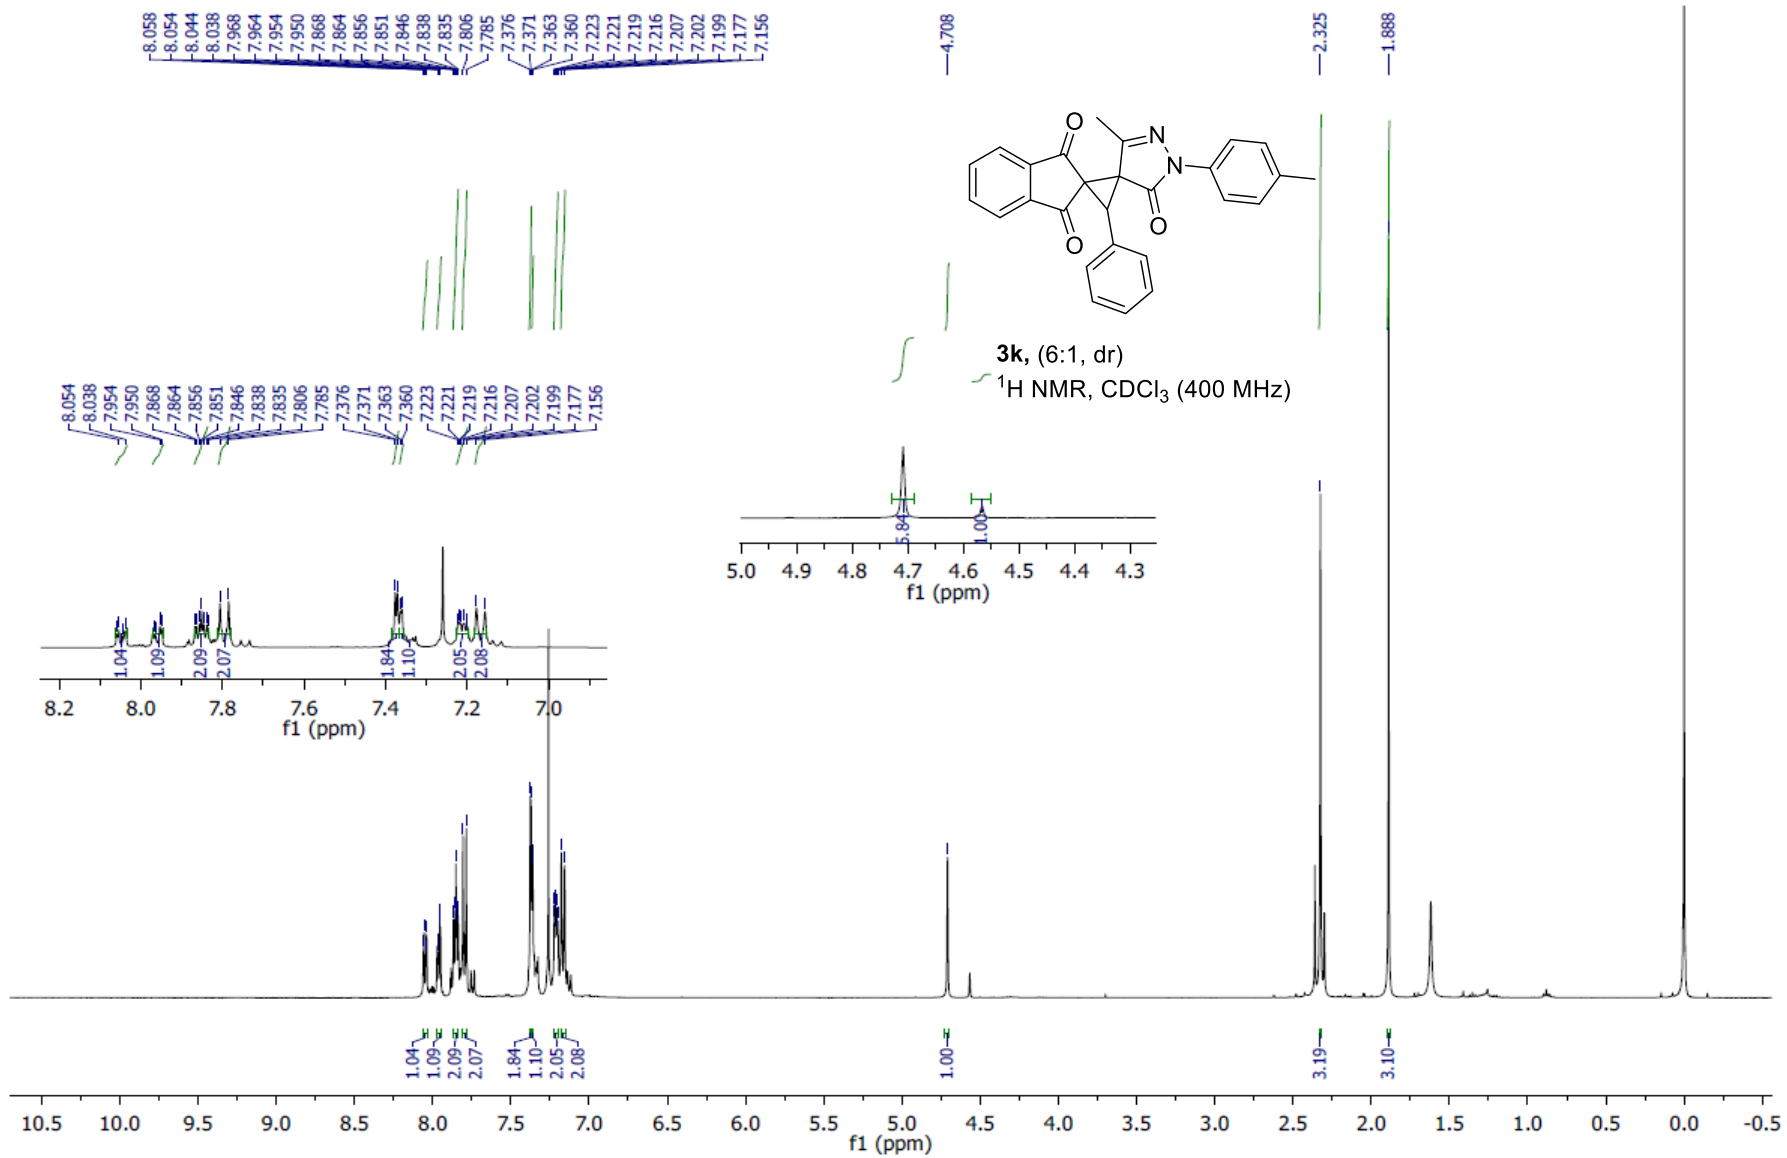



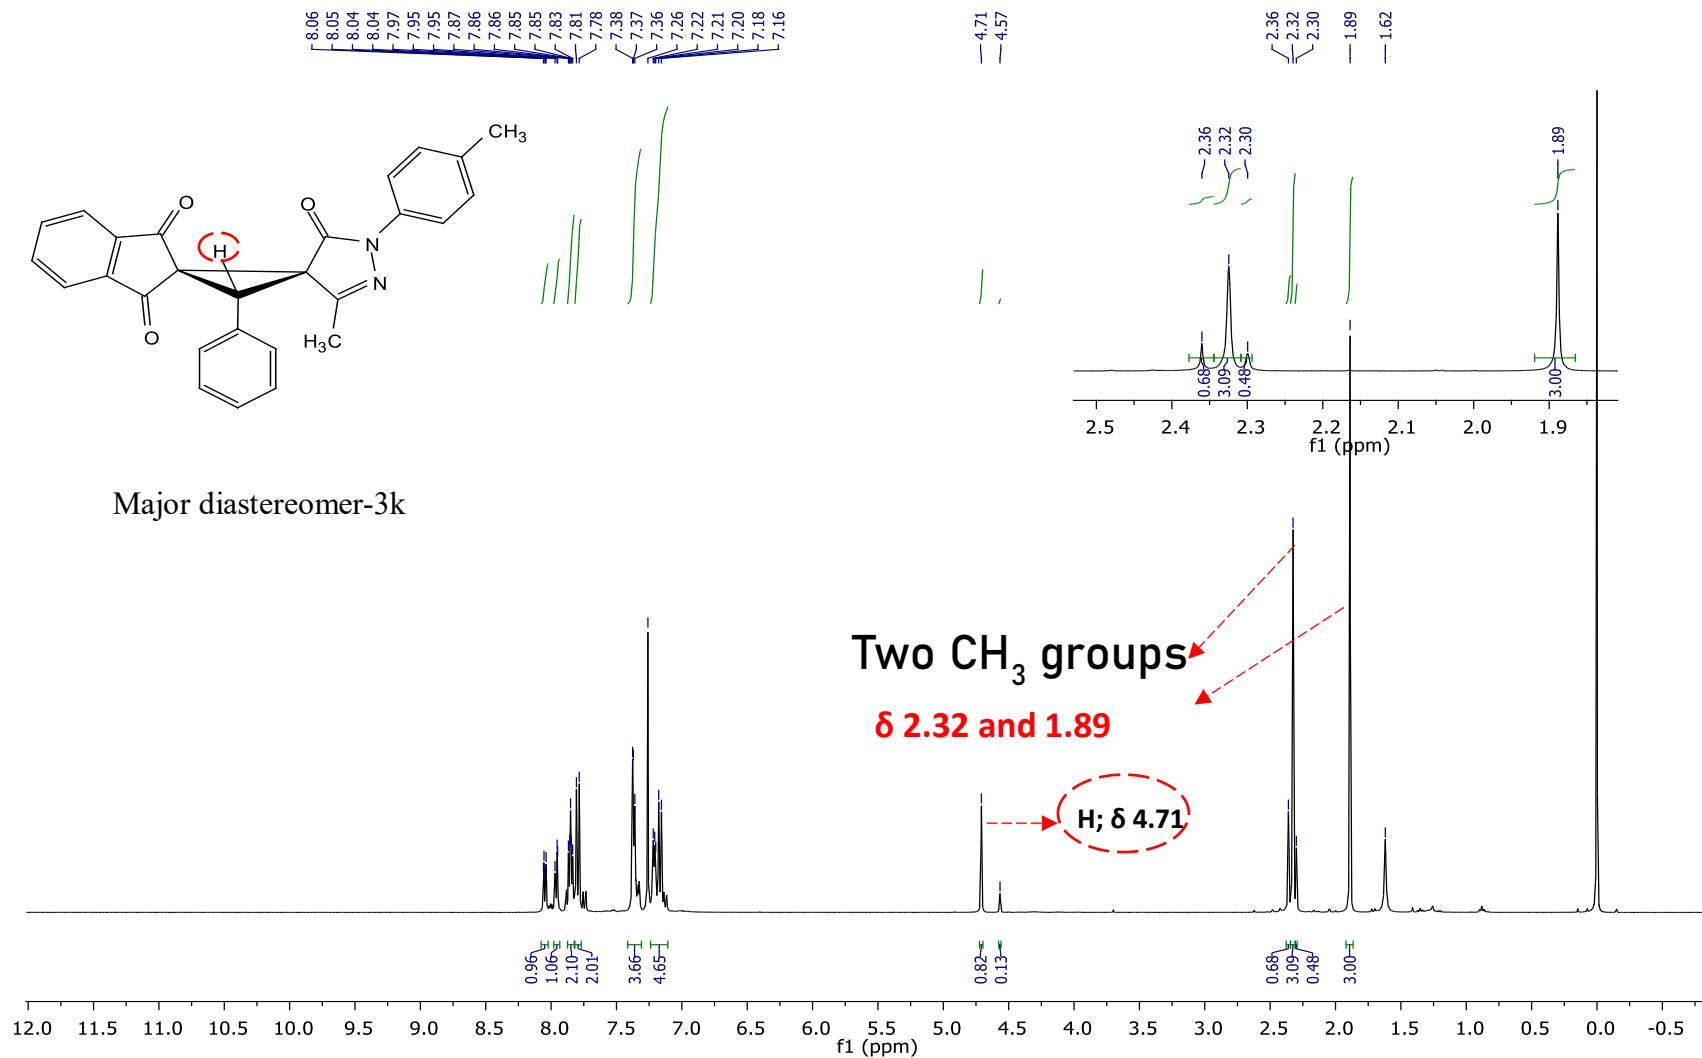

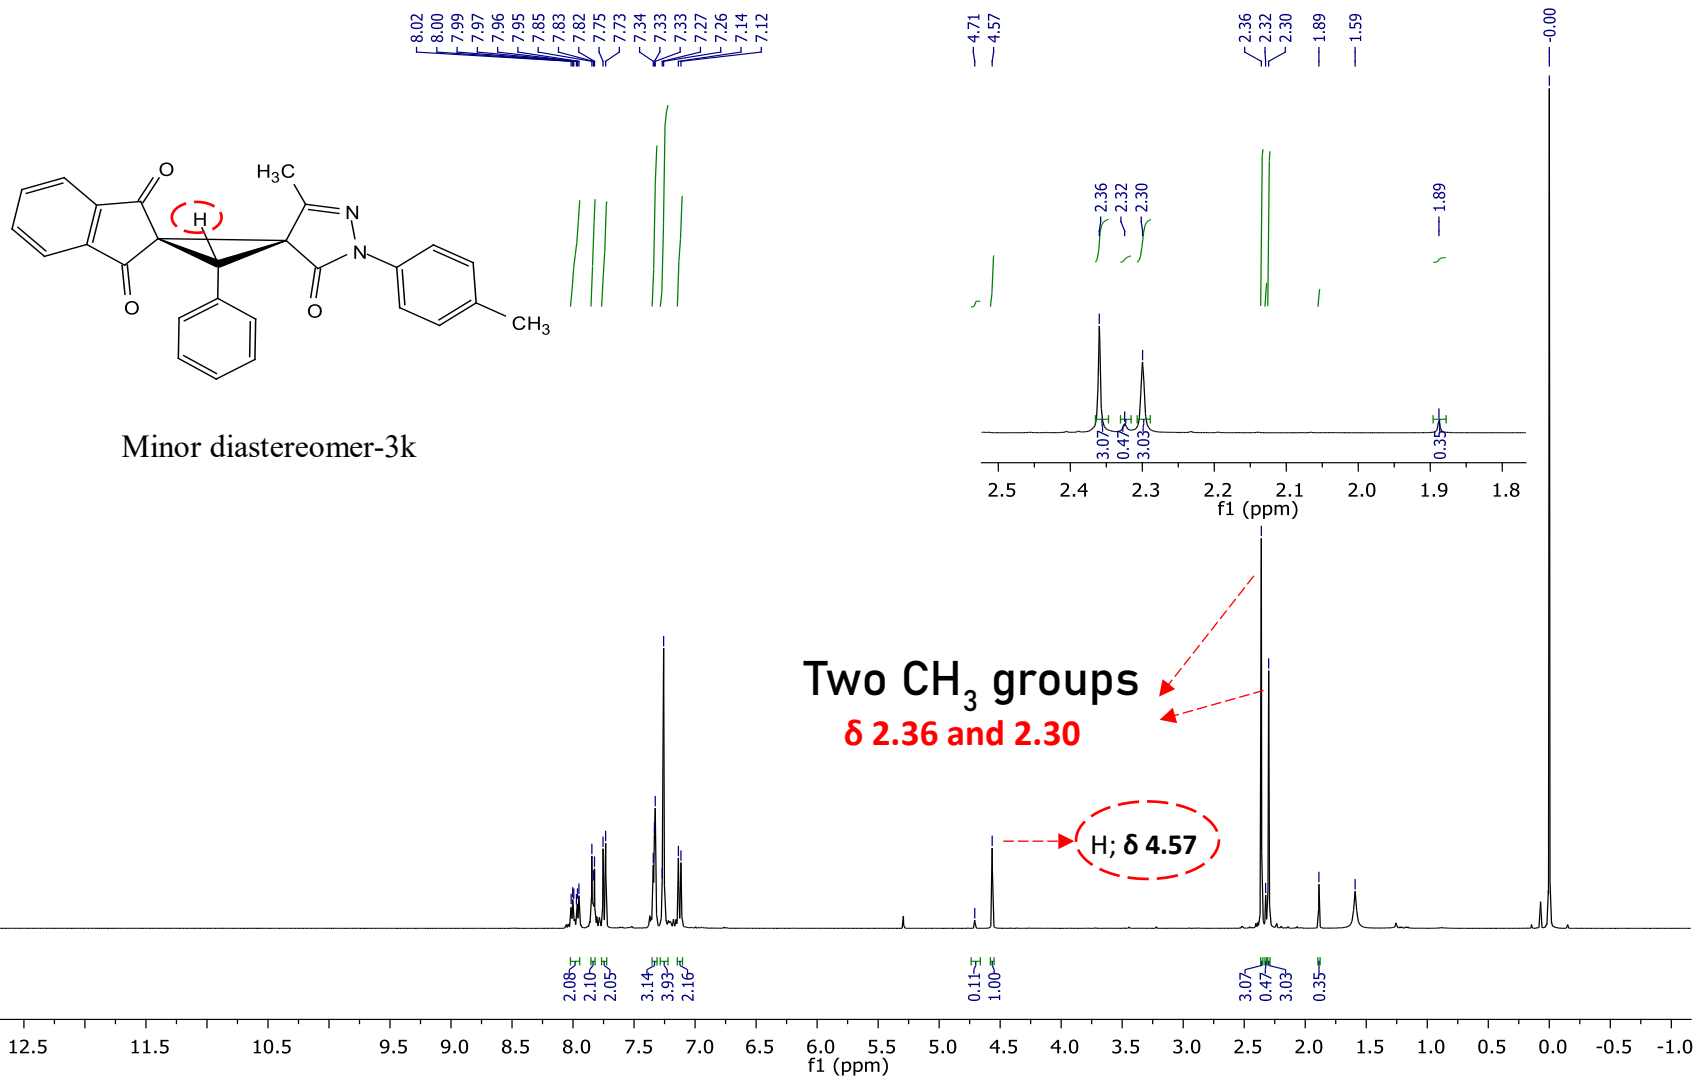

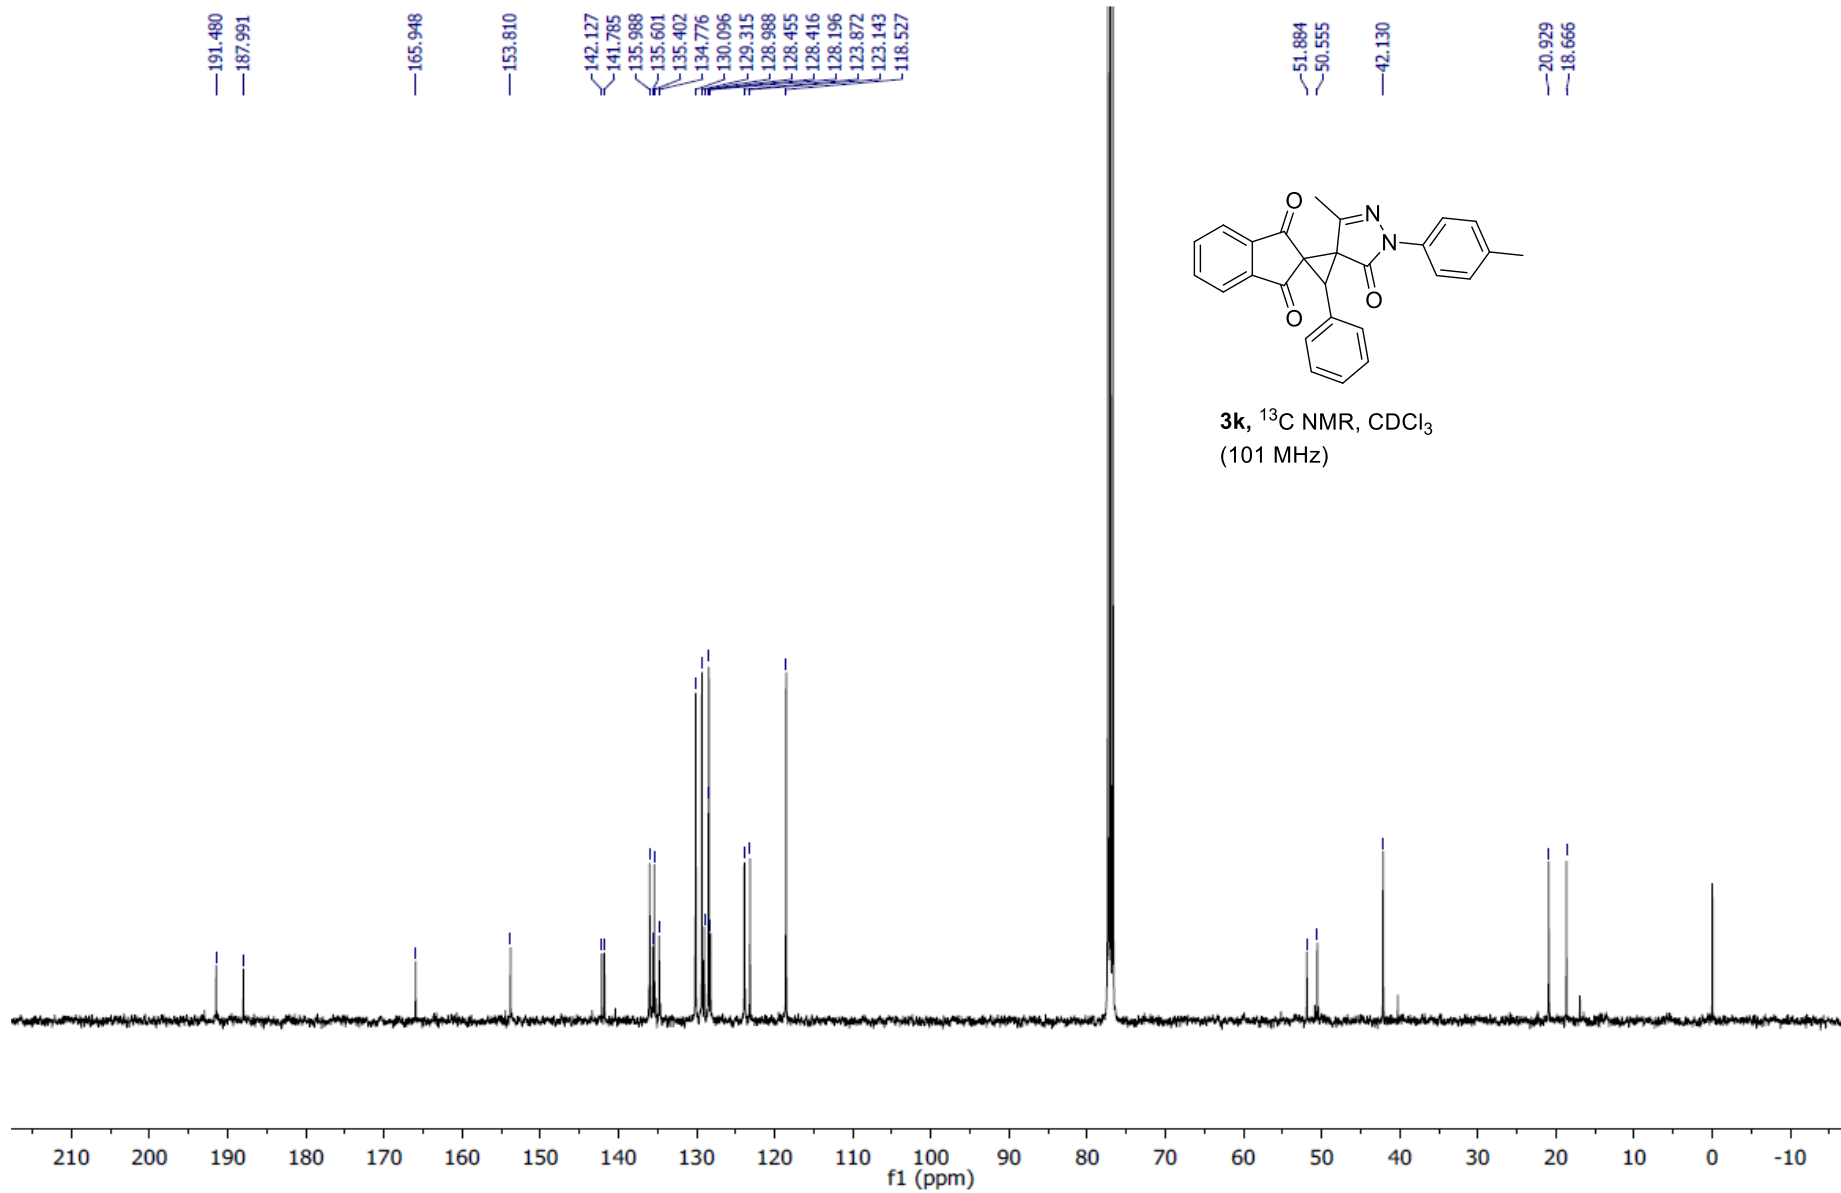

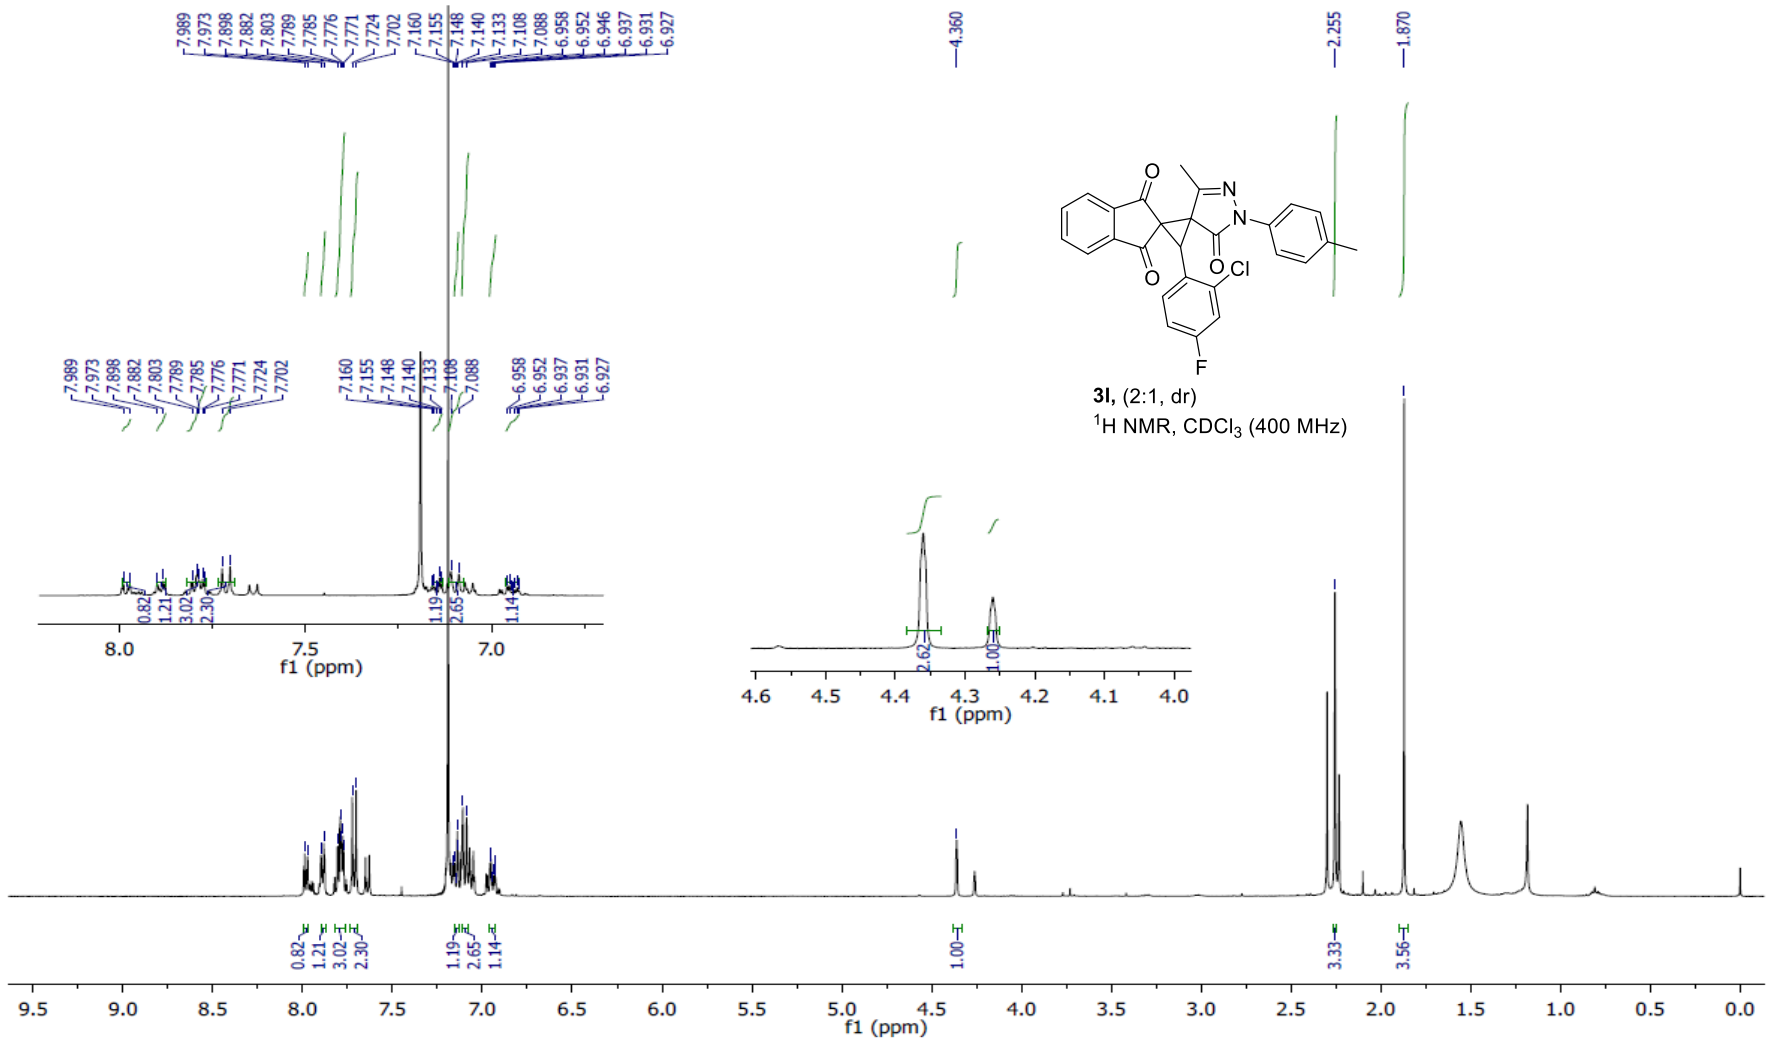

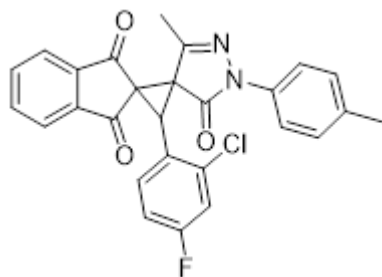

**3I**,  $^{13}\text{C}$  NMR,  $\text{CDCl}_3$   
(101 MHz)  
2:1 dr

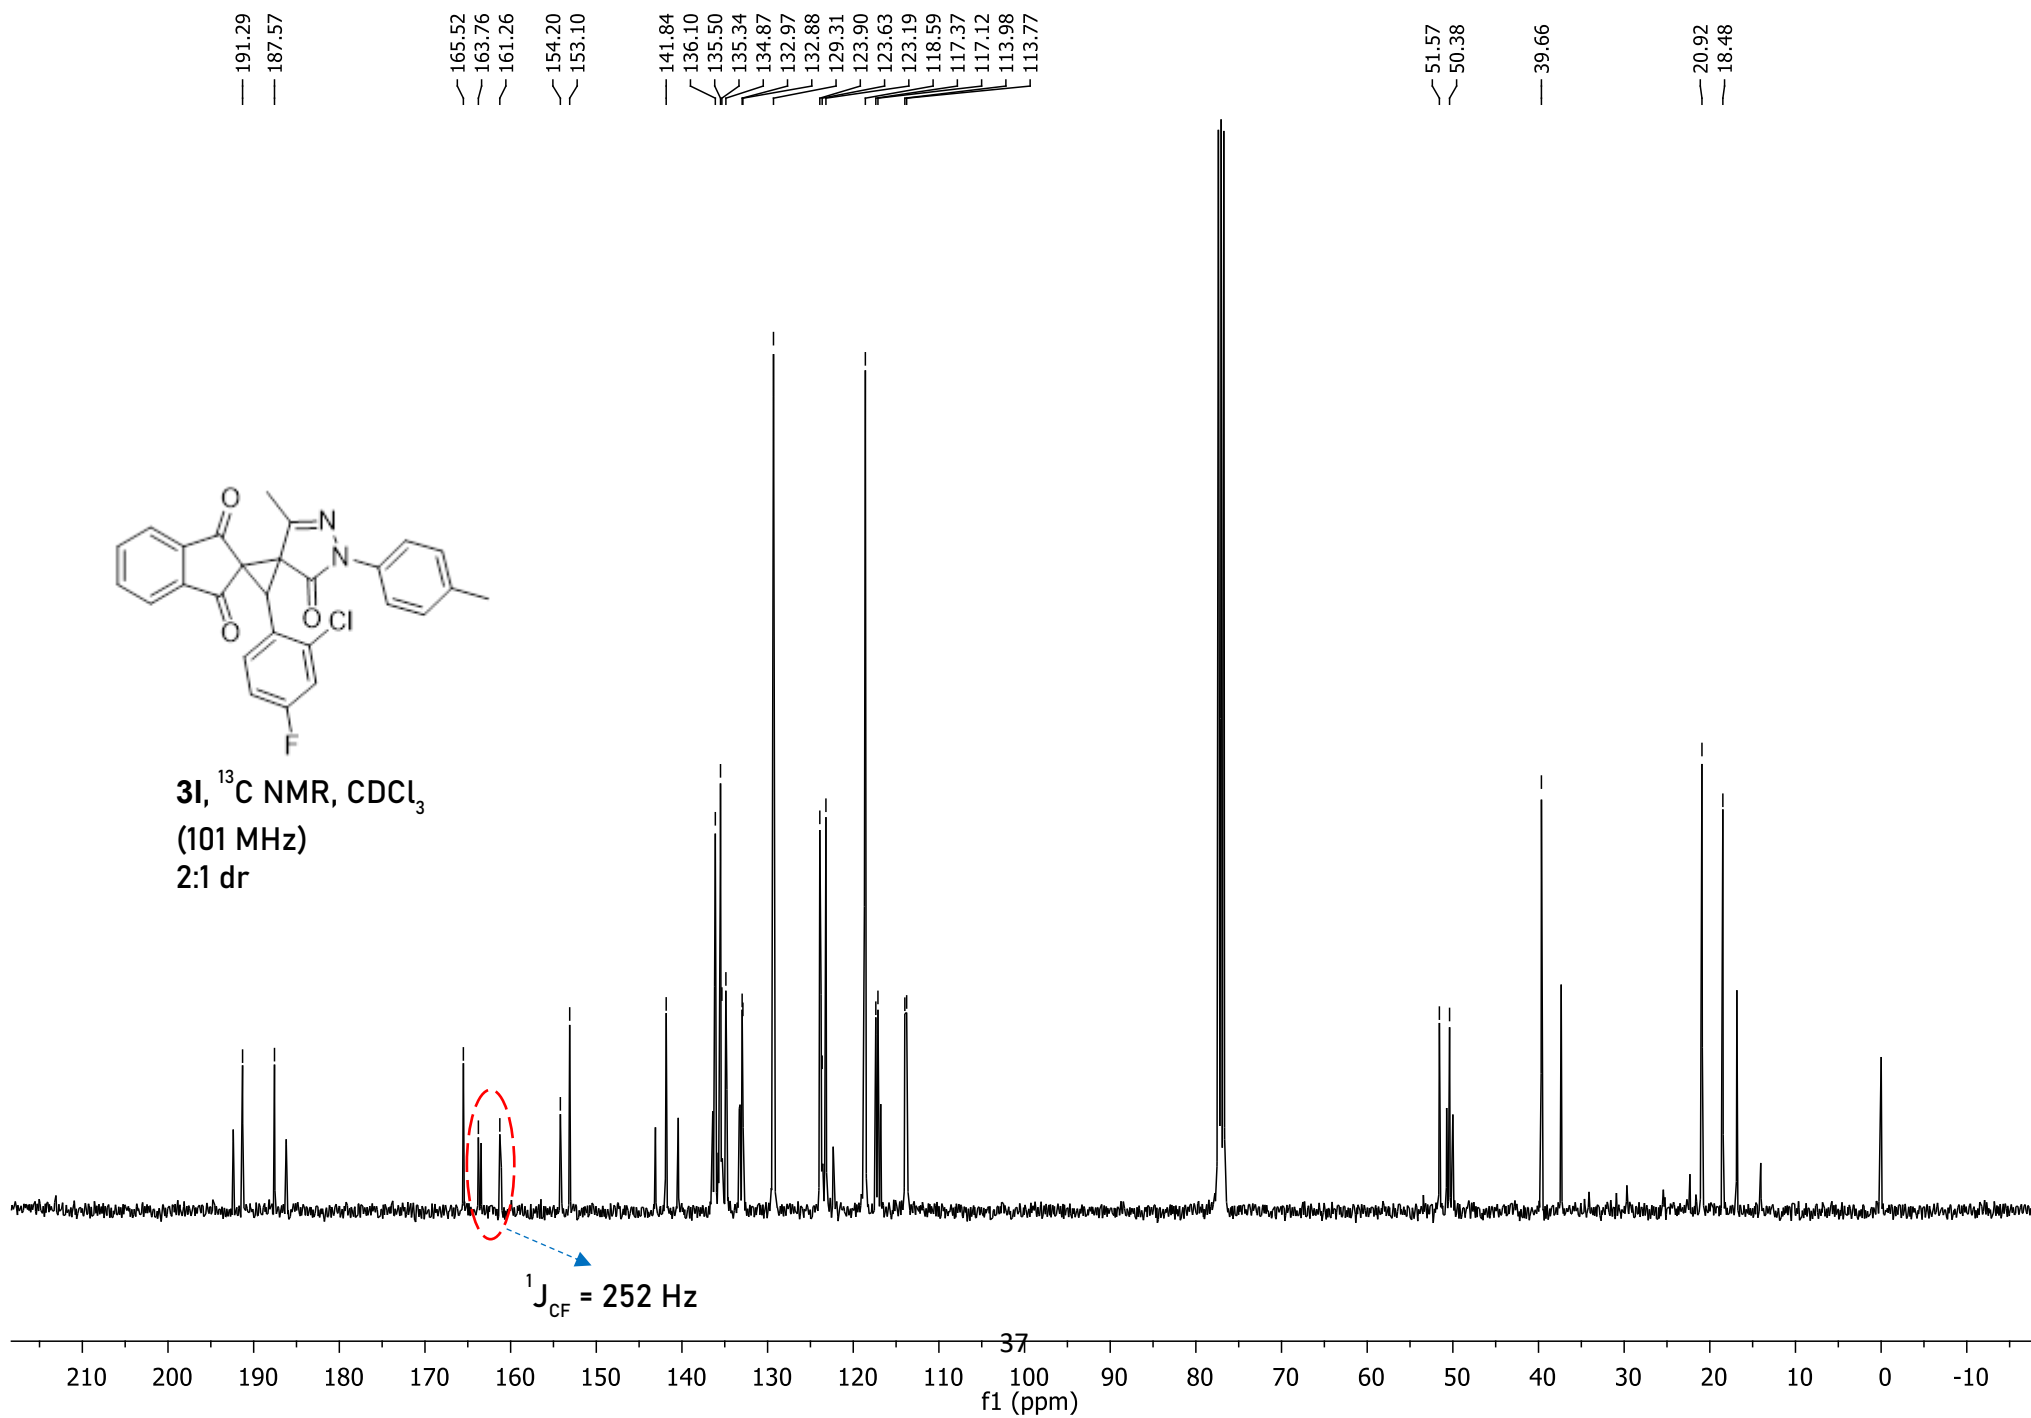

-110.38

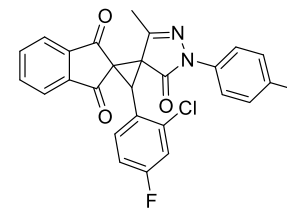

**31**,  $^{19}\text{F}$  NMR,  $\text{CDCl}_3$   
(377 MHz)

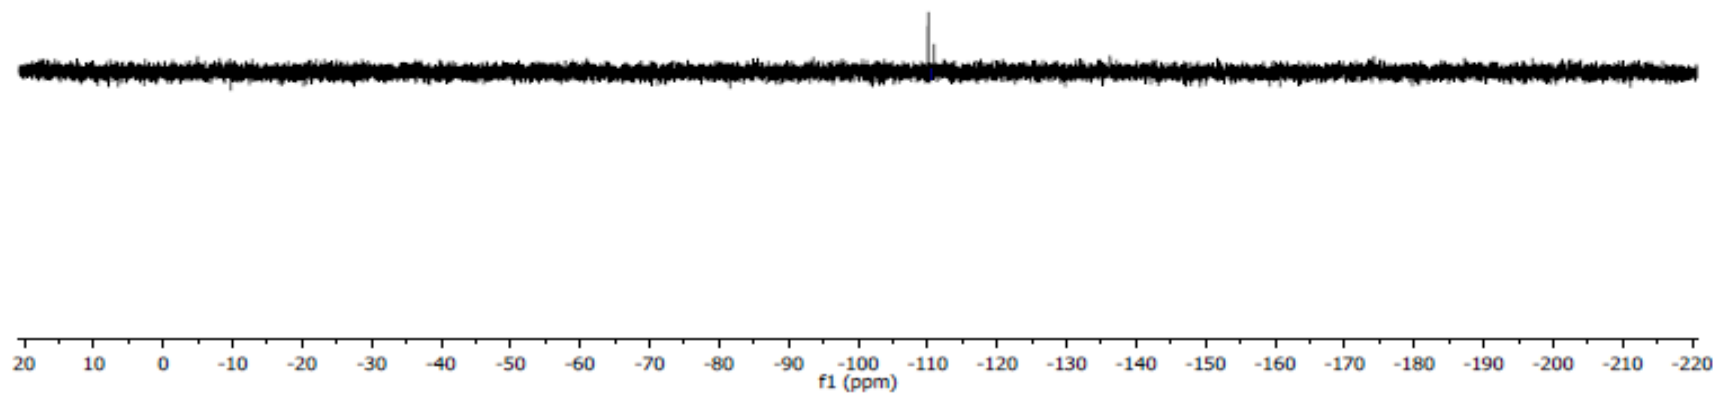

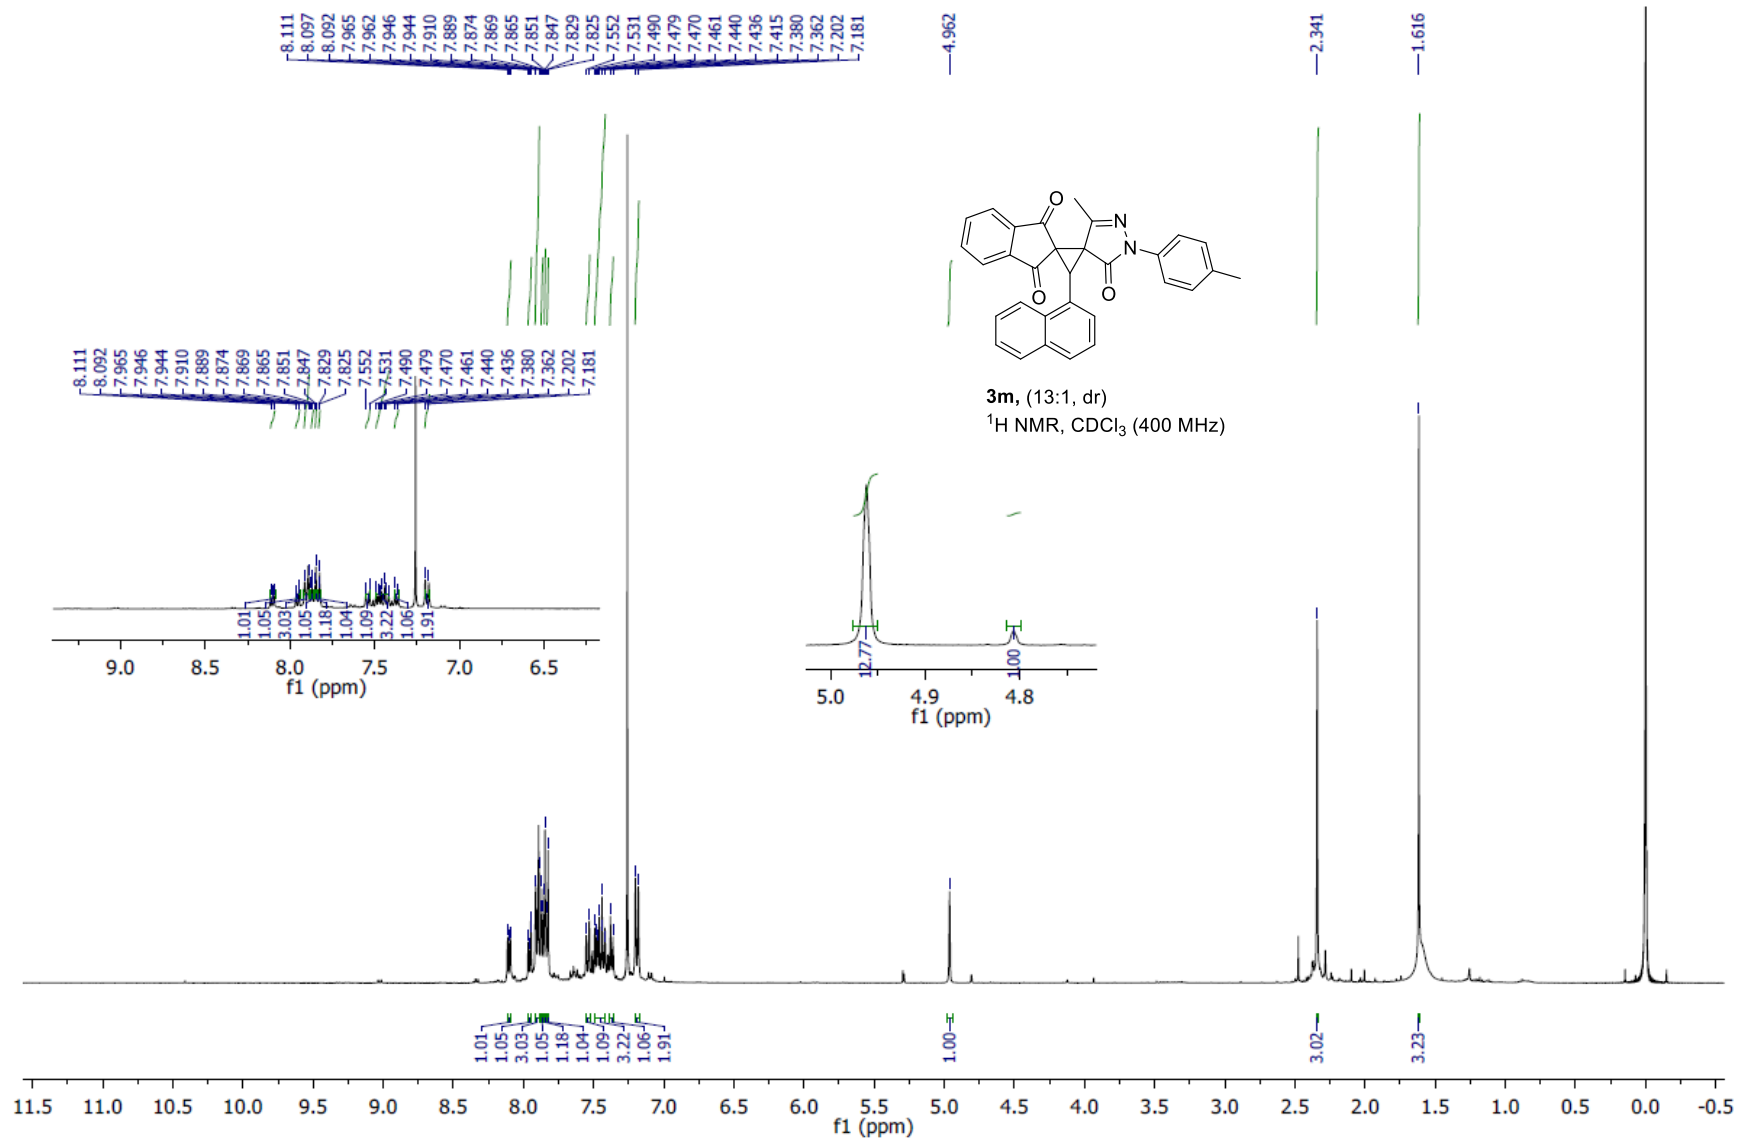

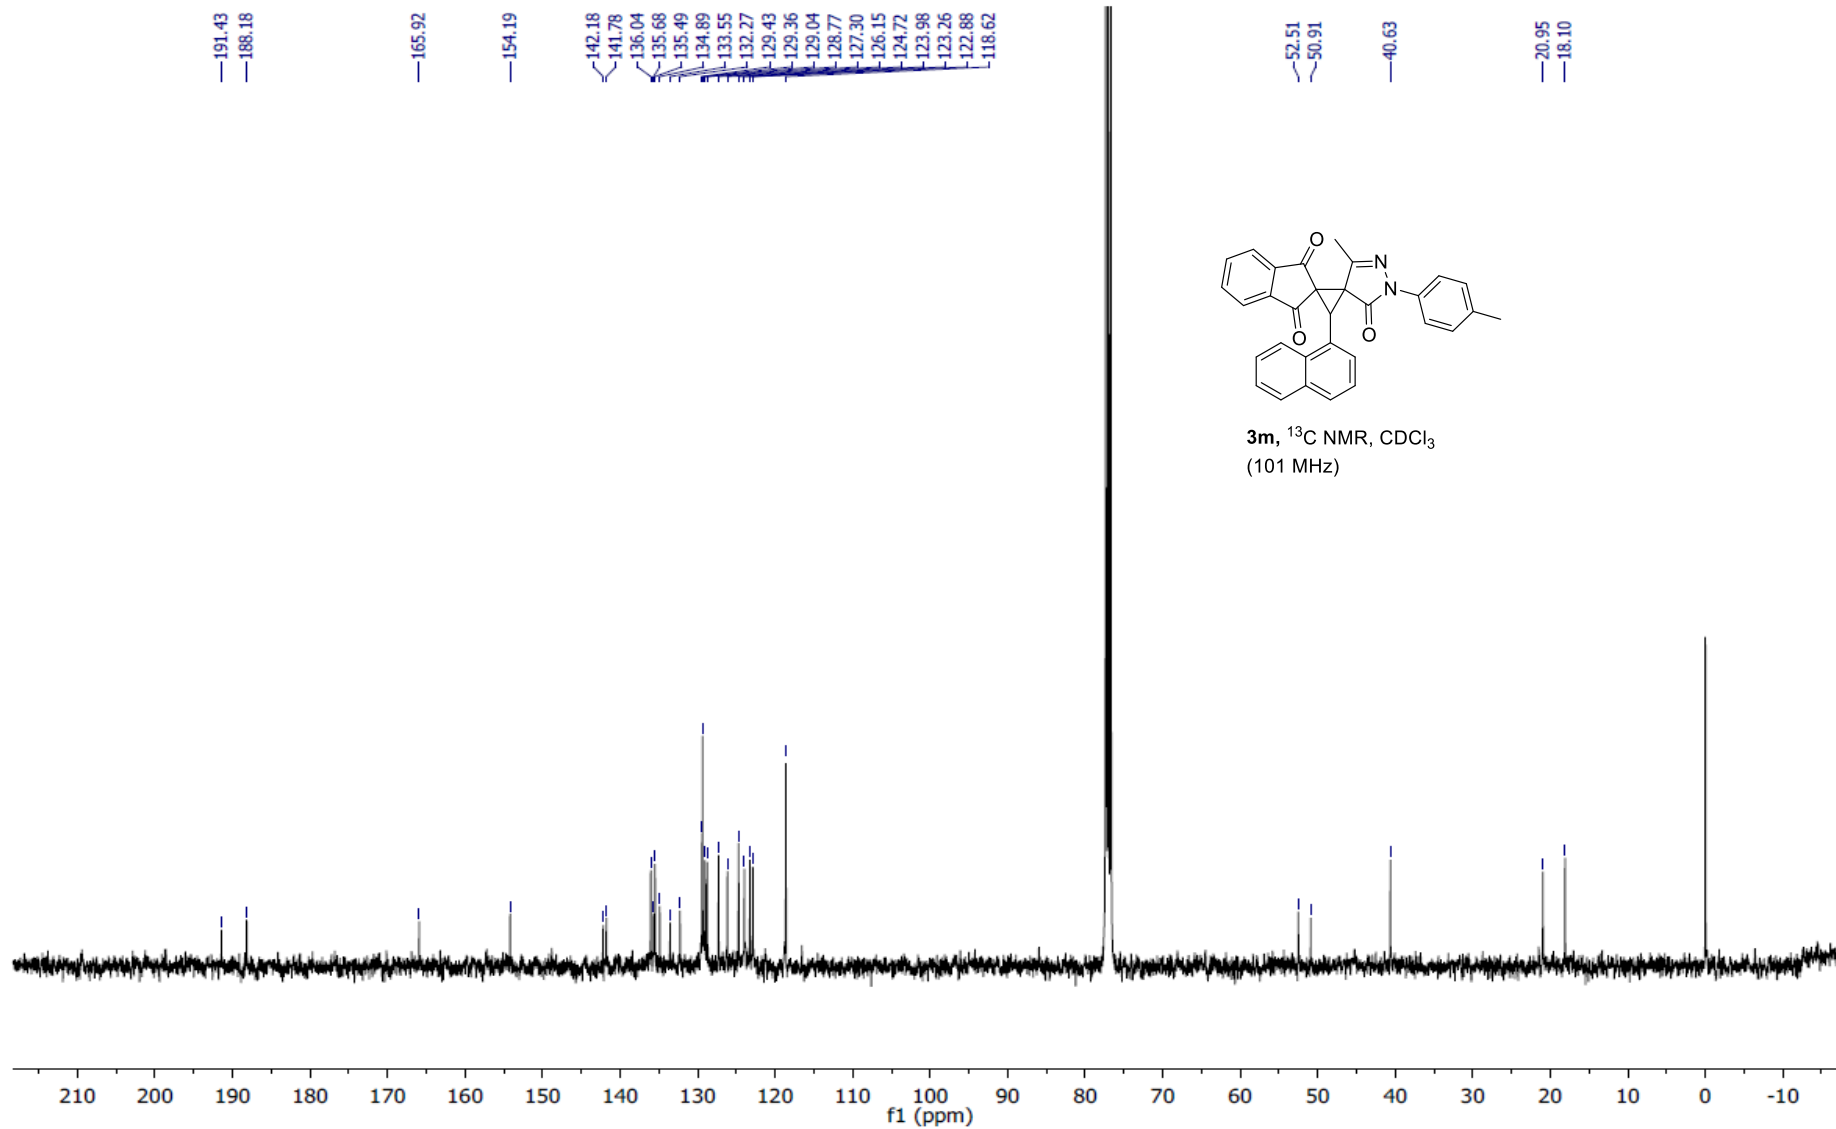



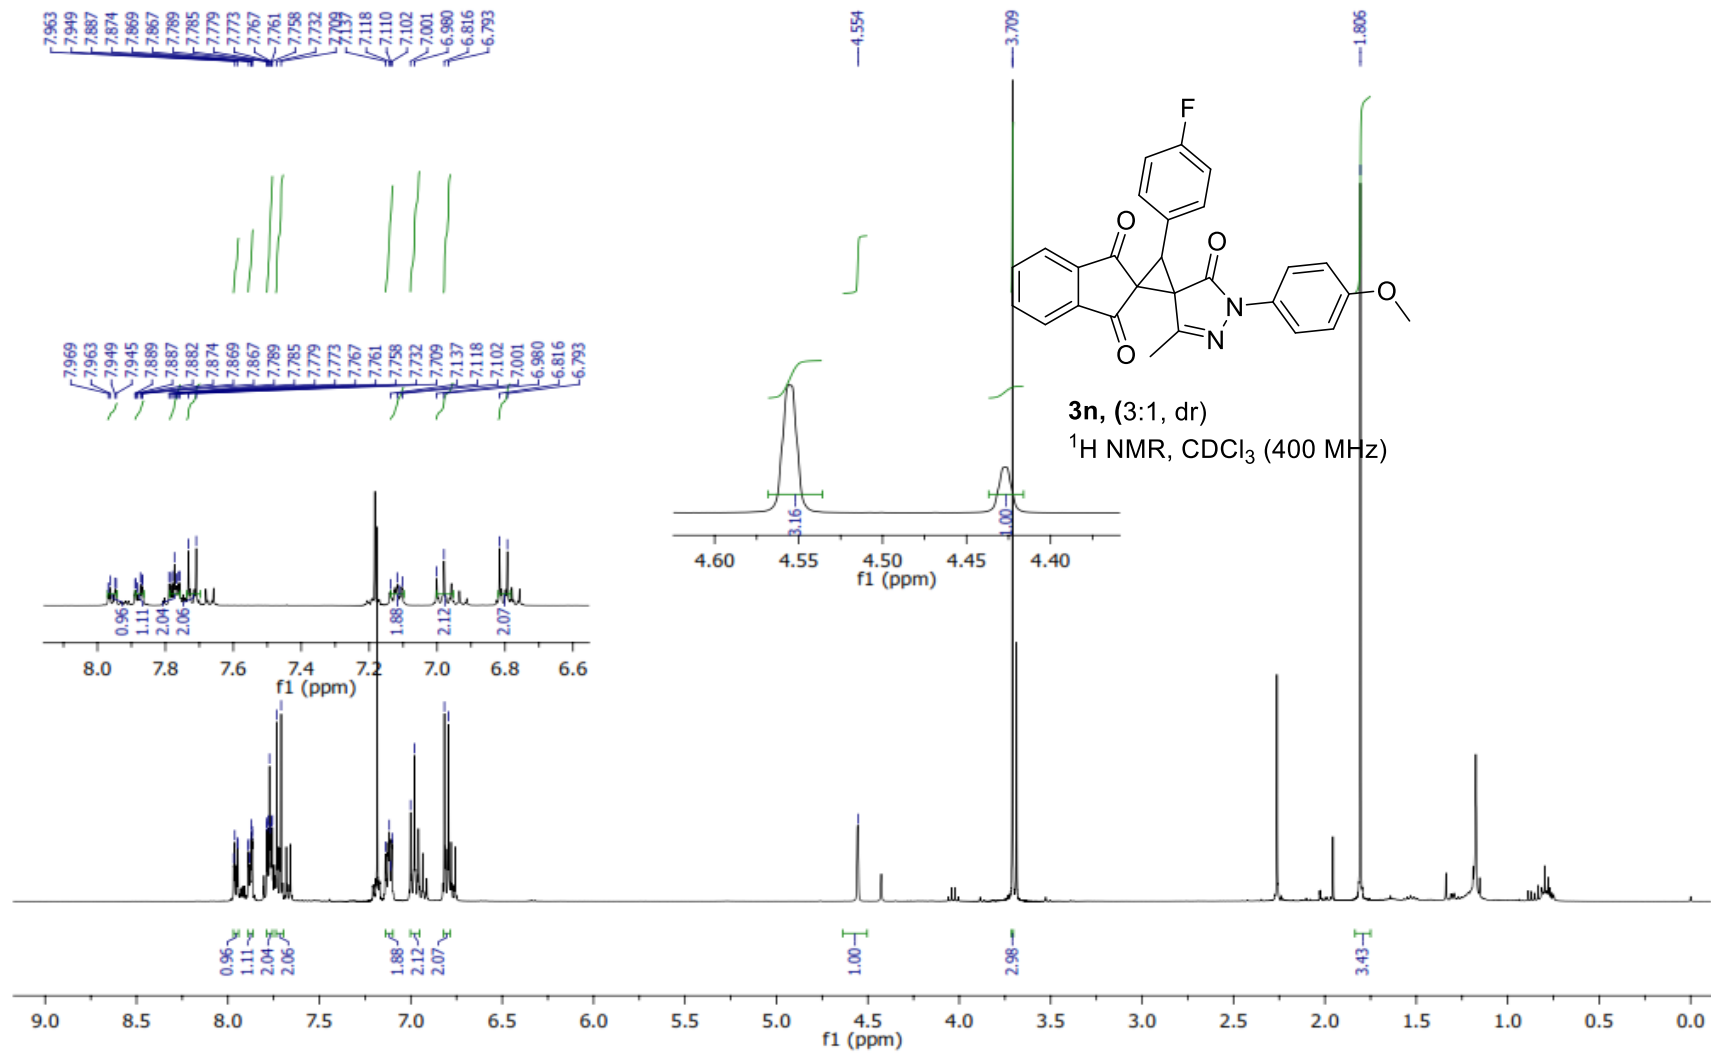

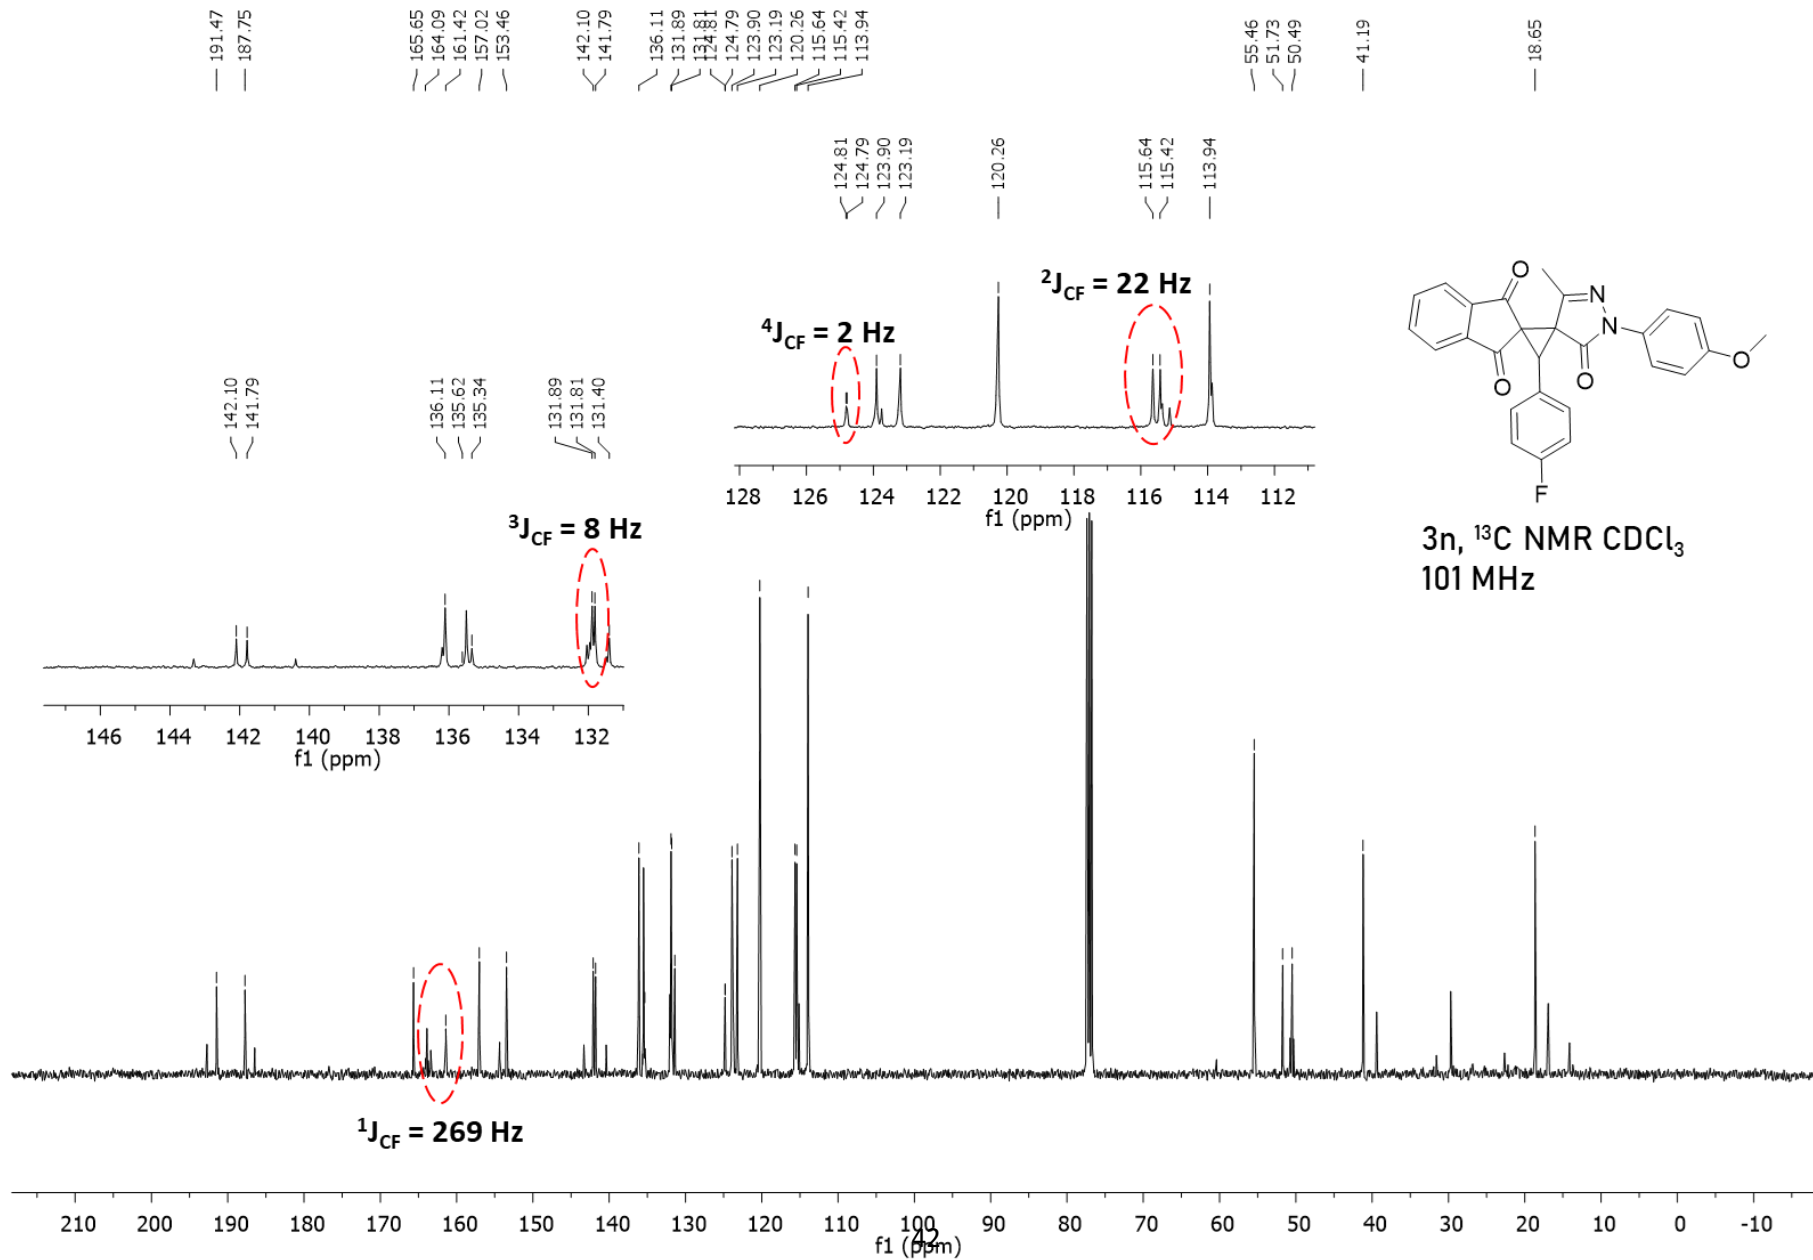

— -112.67

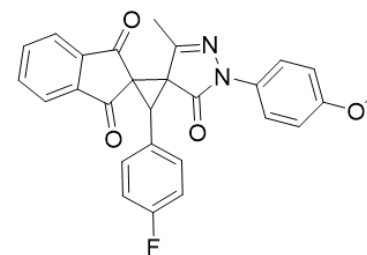

3n,  $^{19}\text{F}$  NMR  $\text{CDCl}_3$   
377 MHz

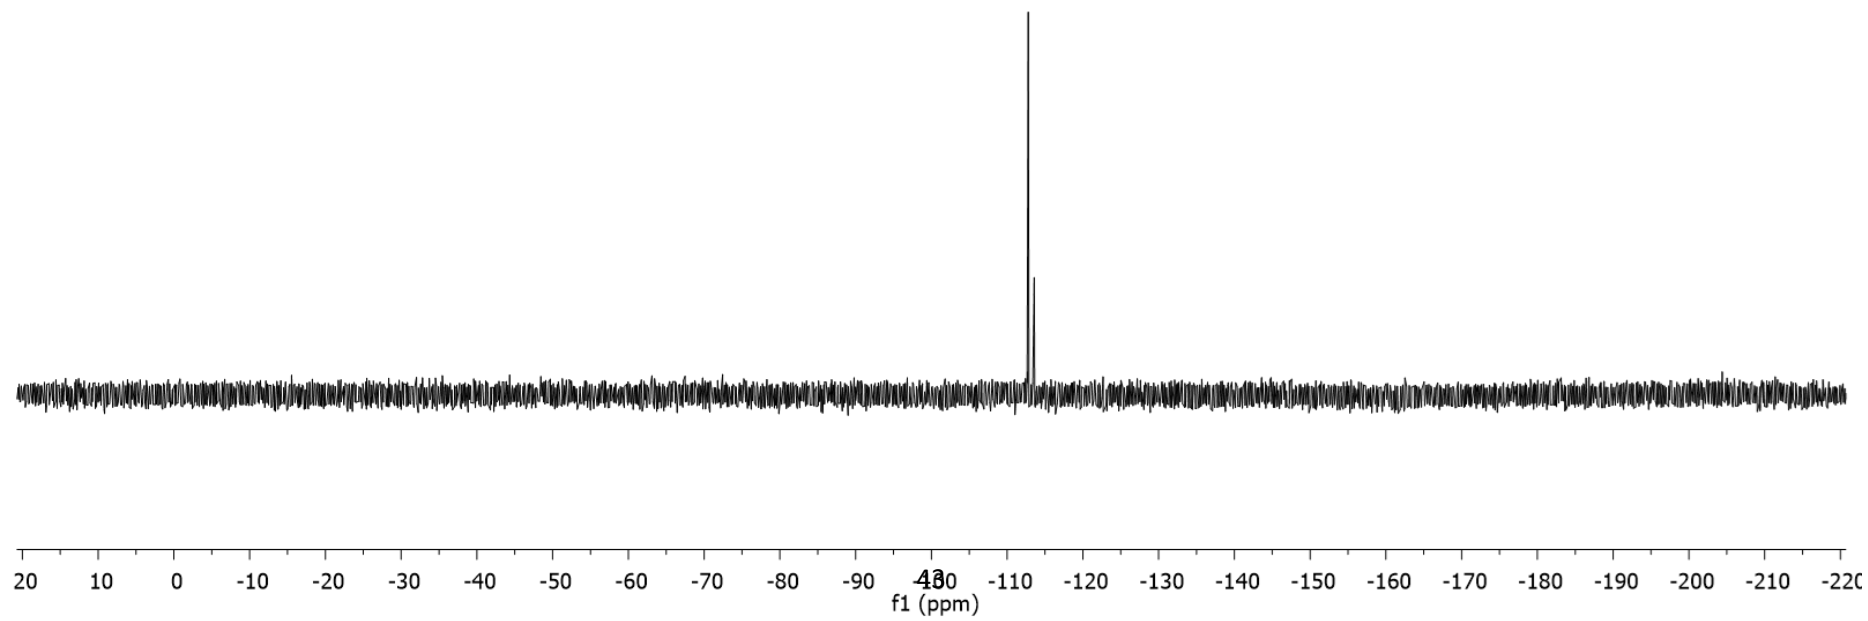

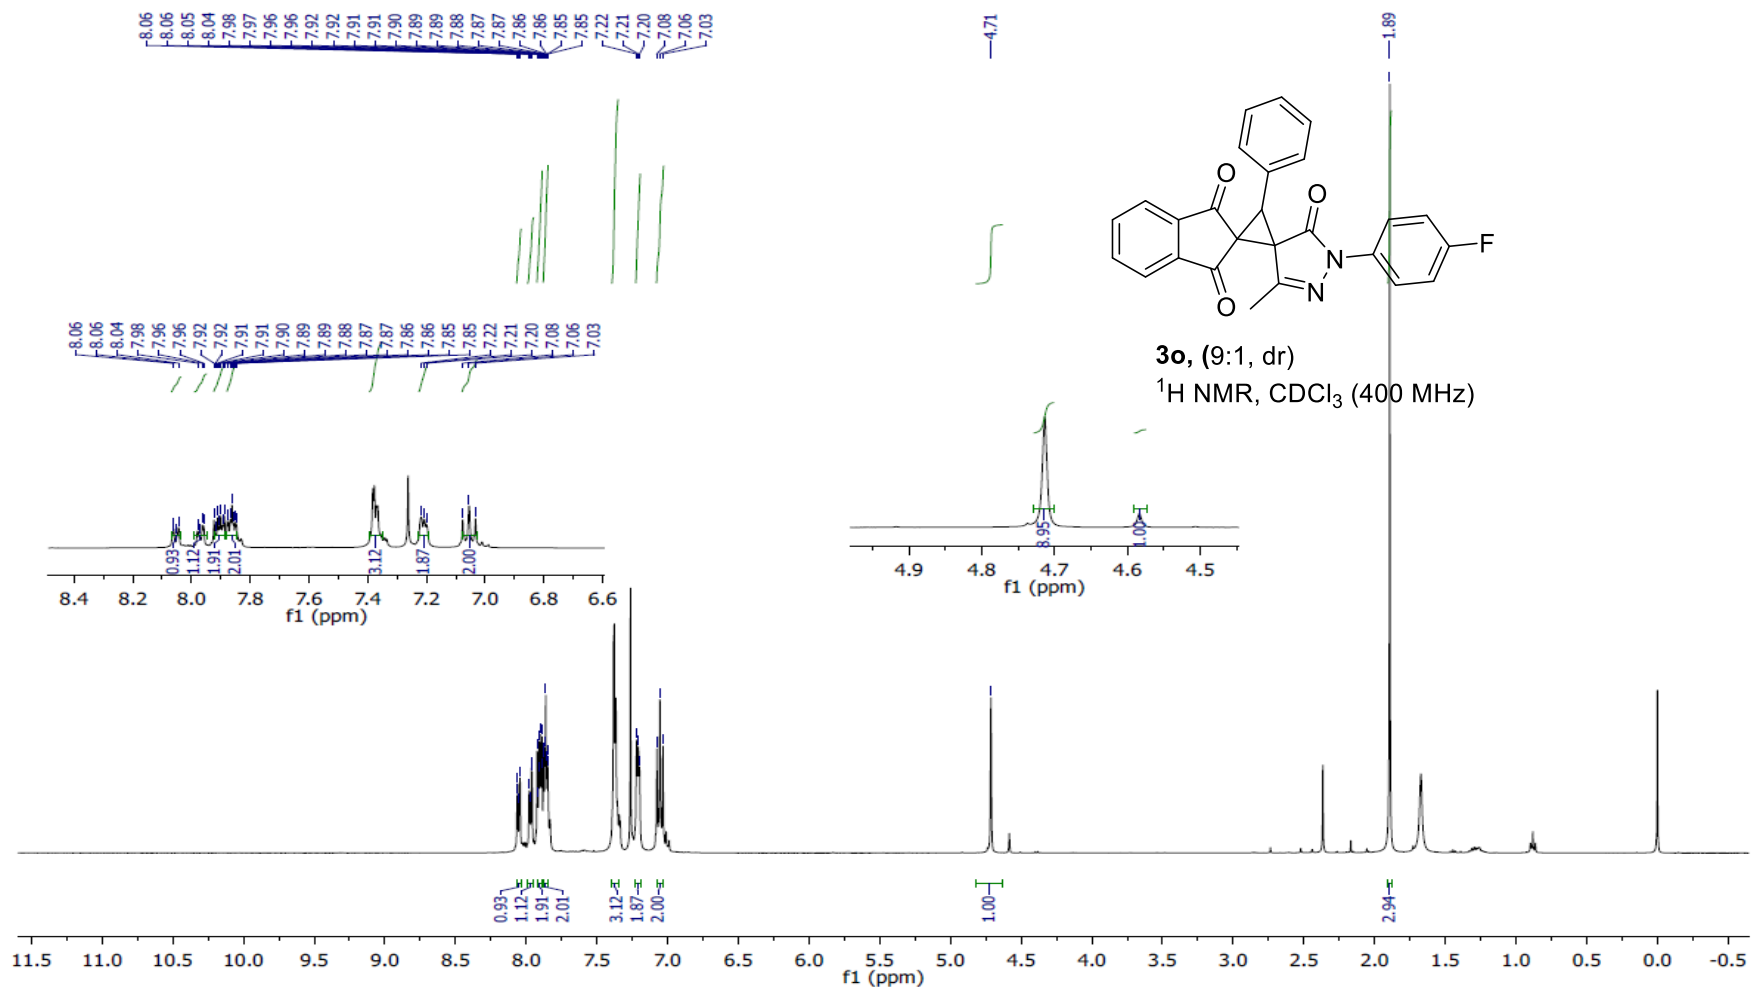

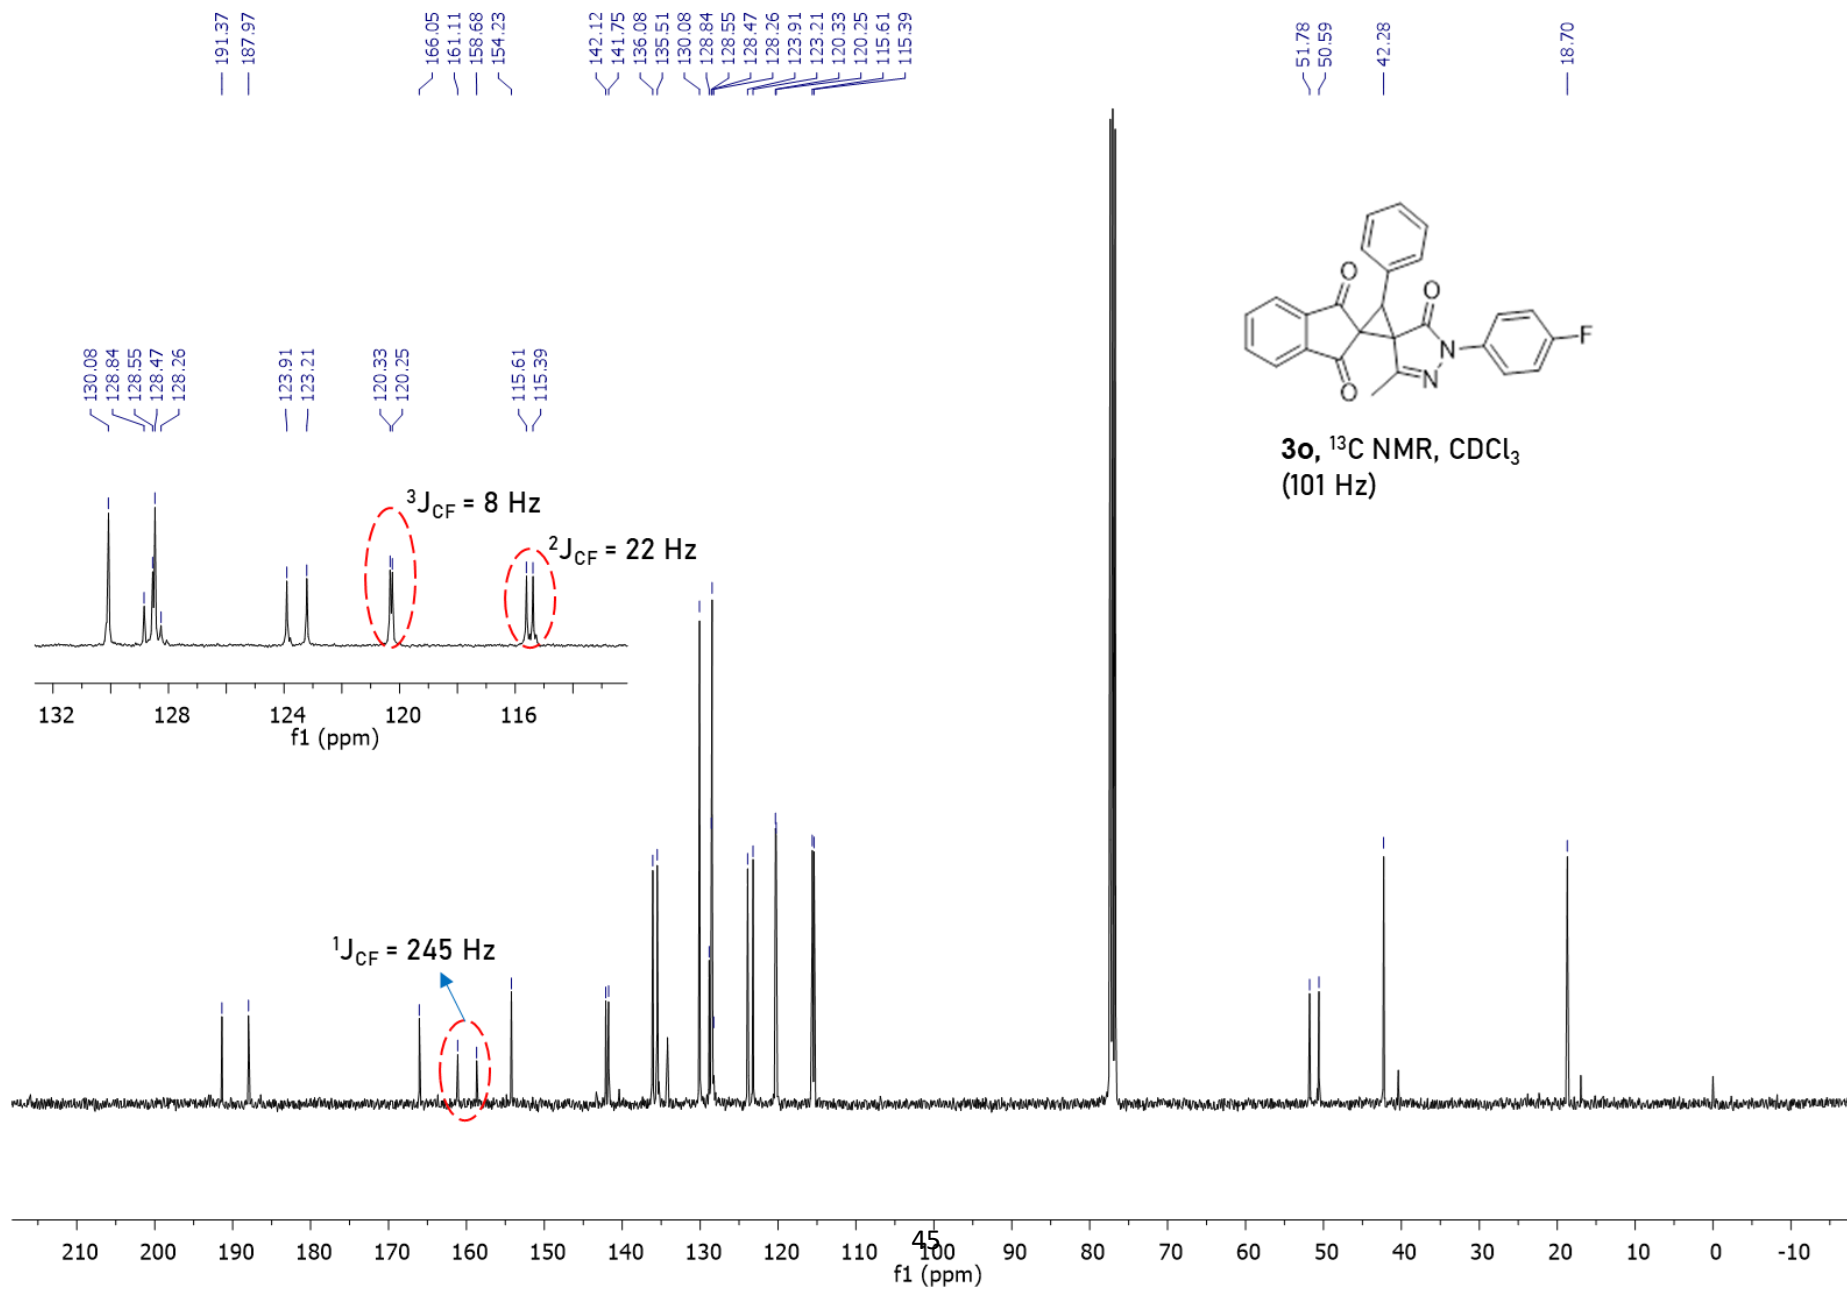

-117.71

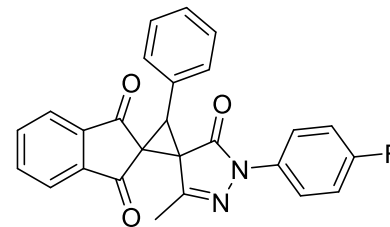

**3o**,  $^{19}\text{F}$  NMR,  $\text{CDCl}_3$   
(377 MHz)

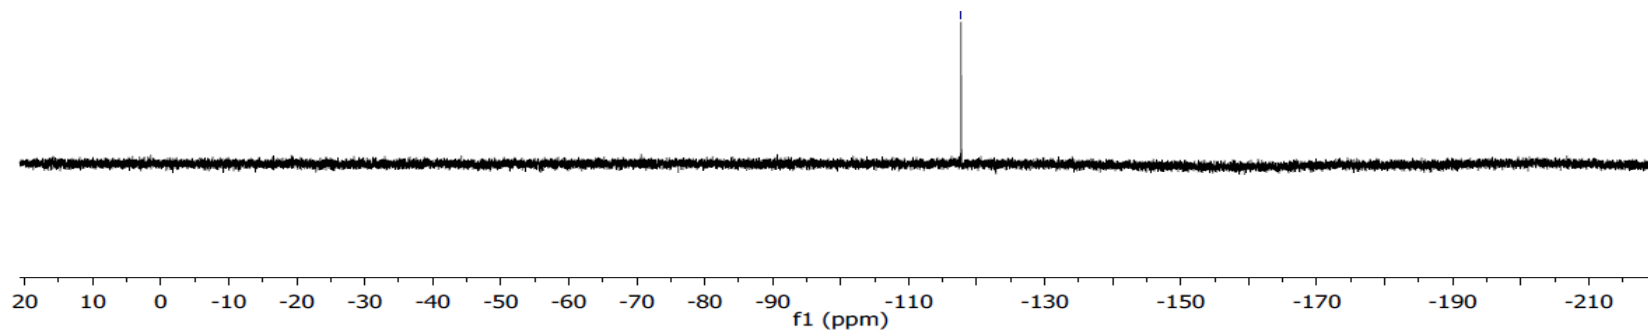

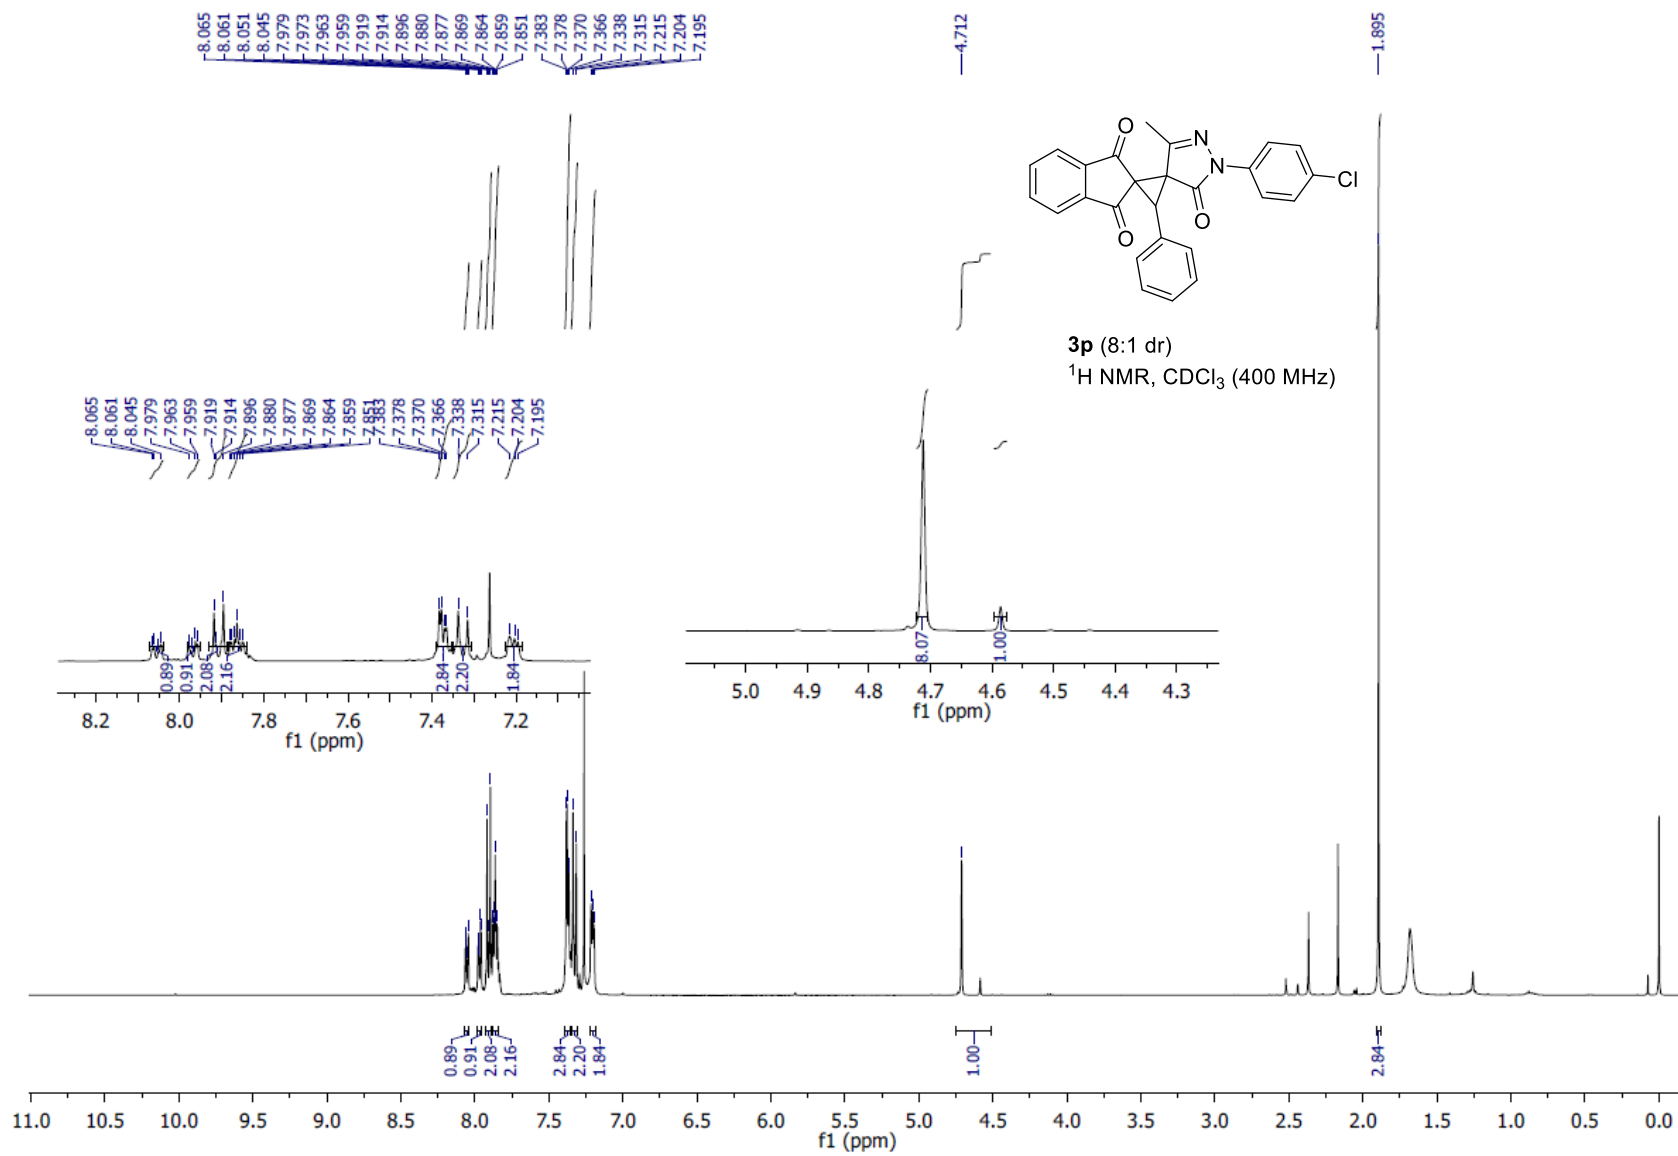

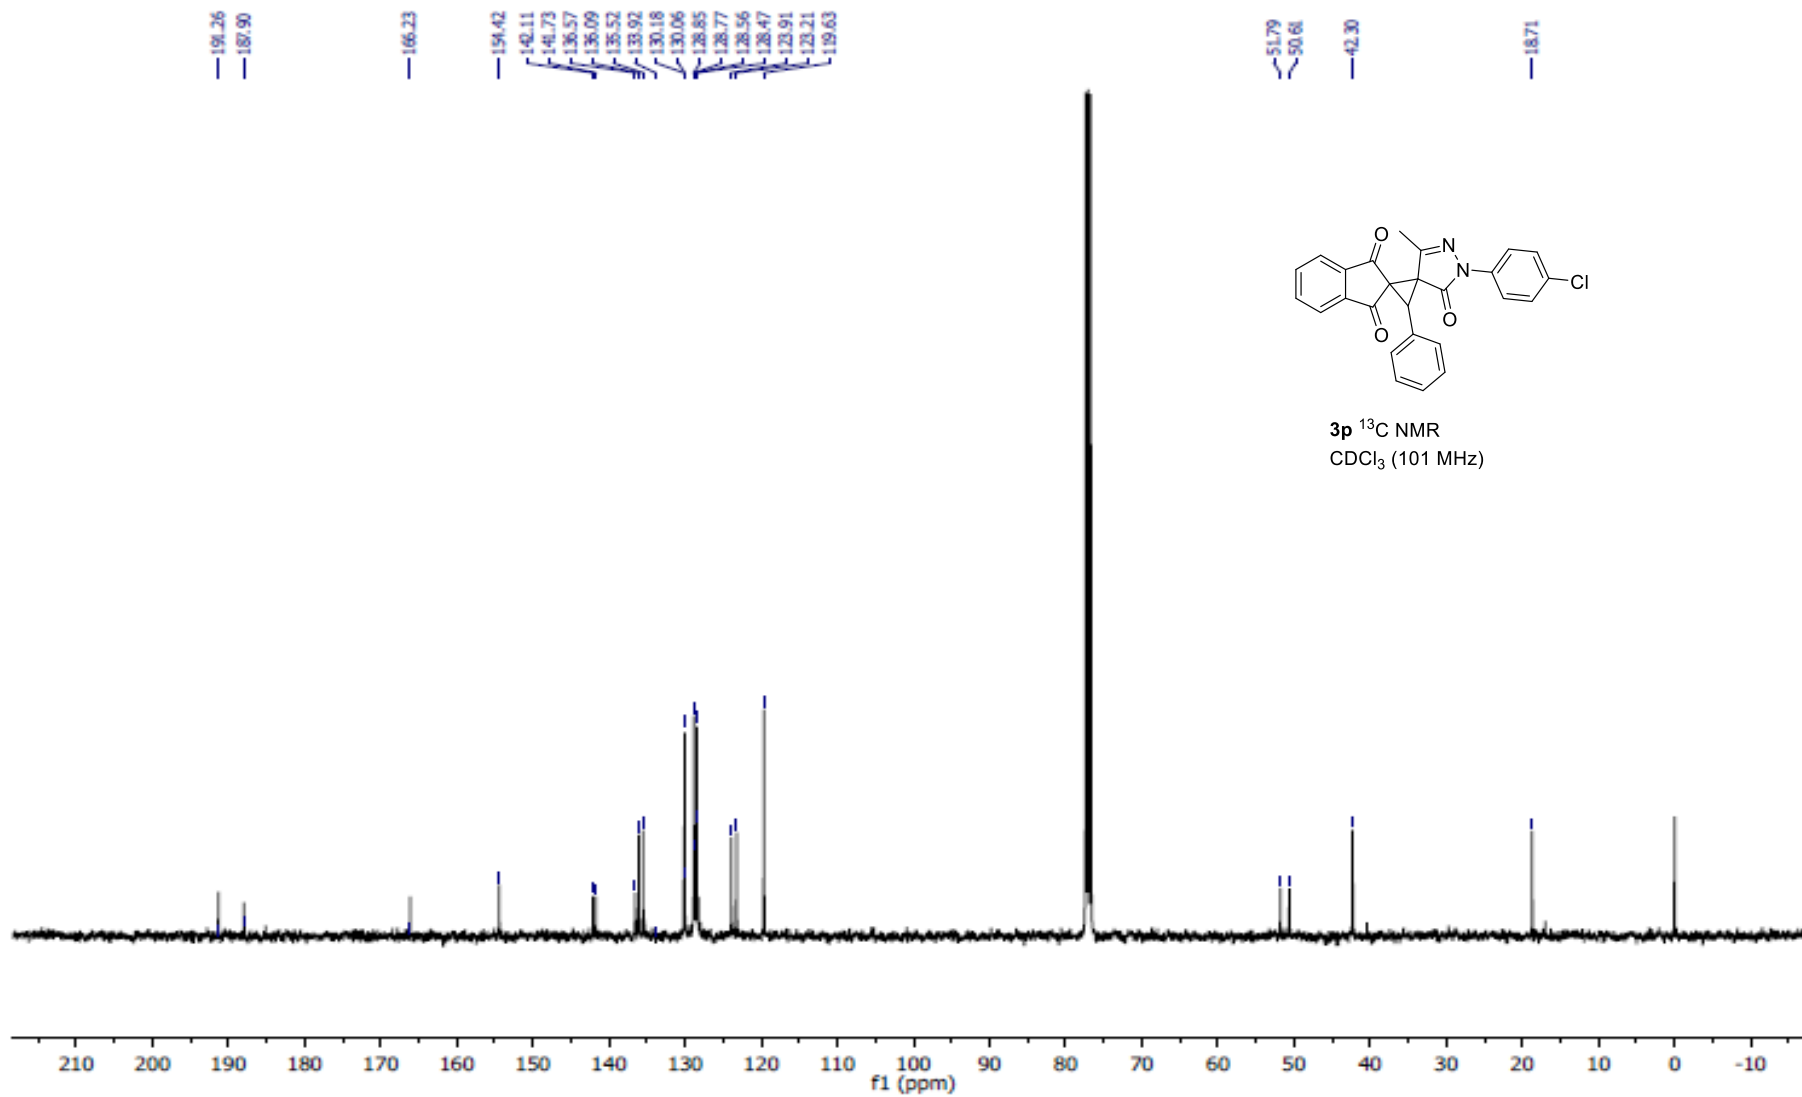



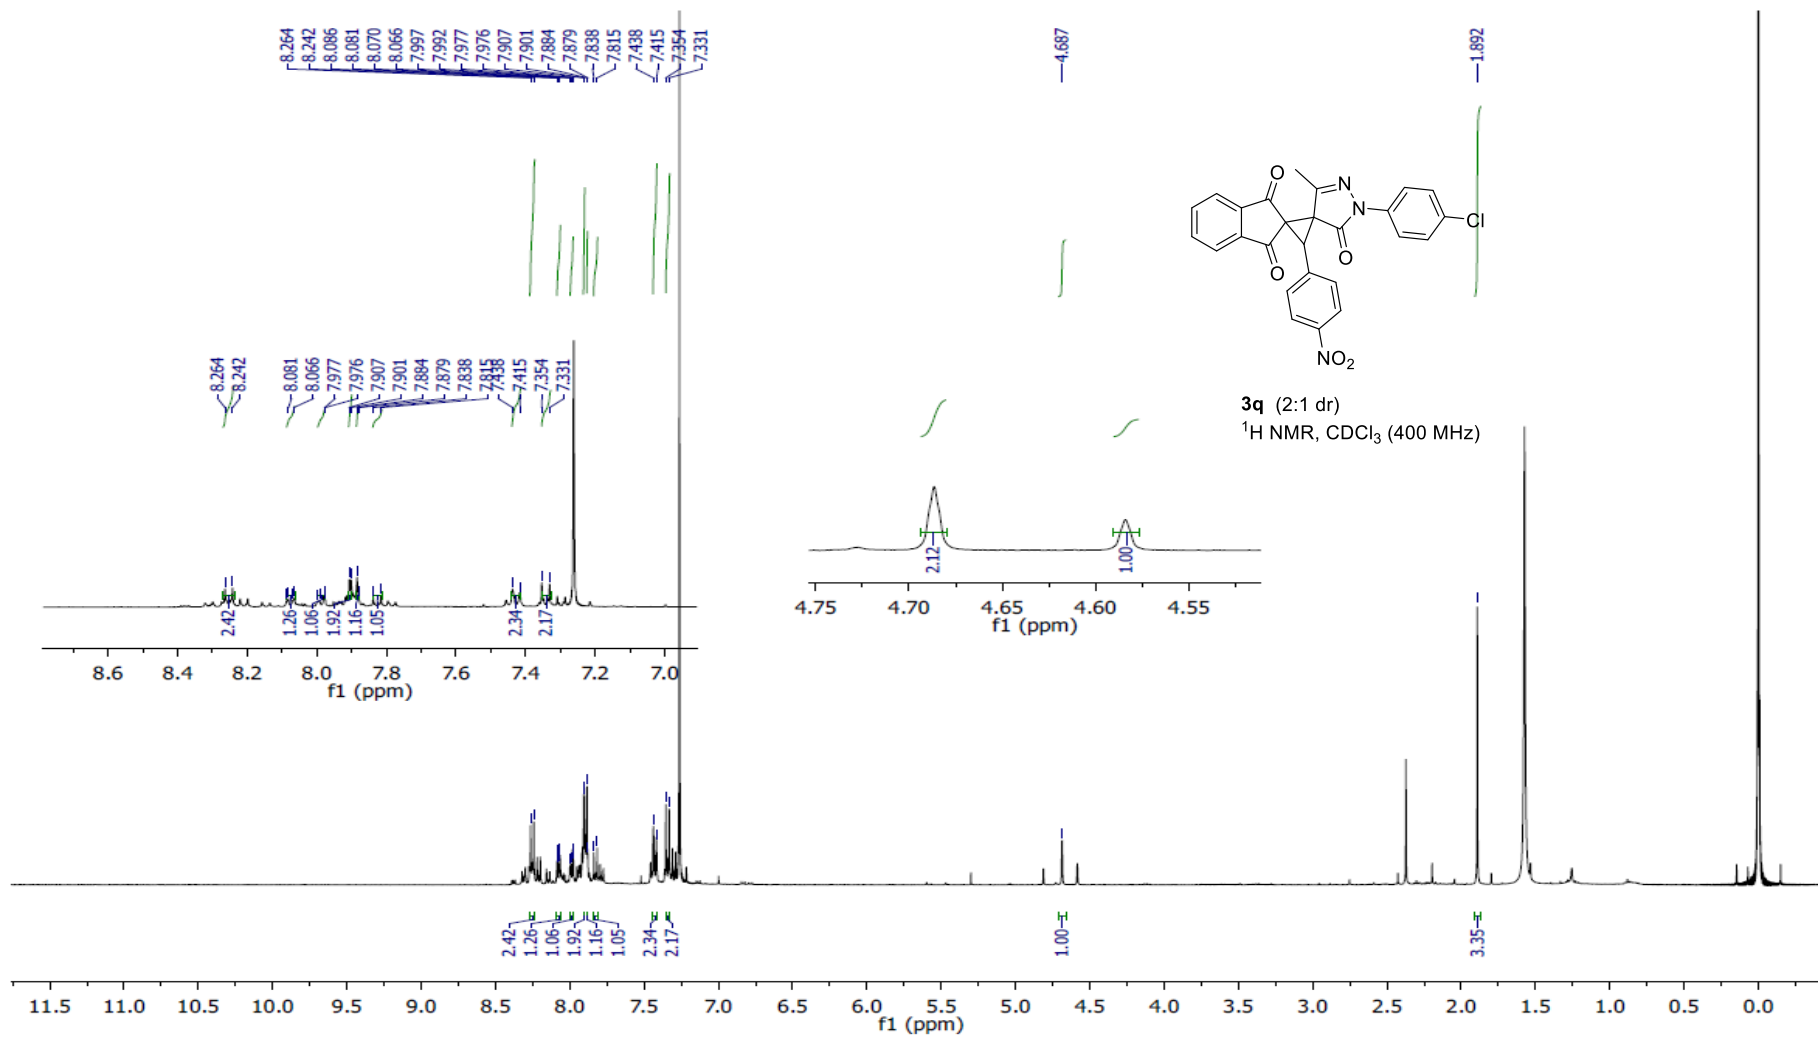

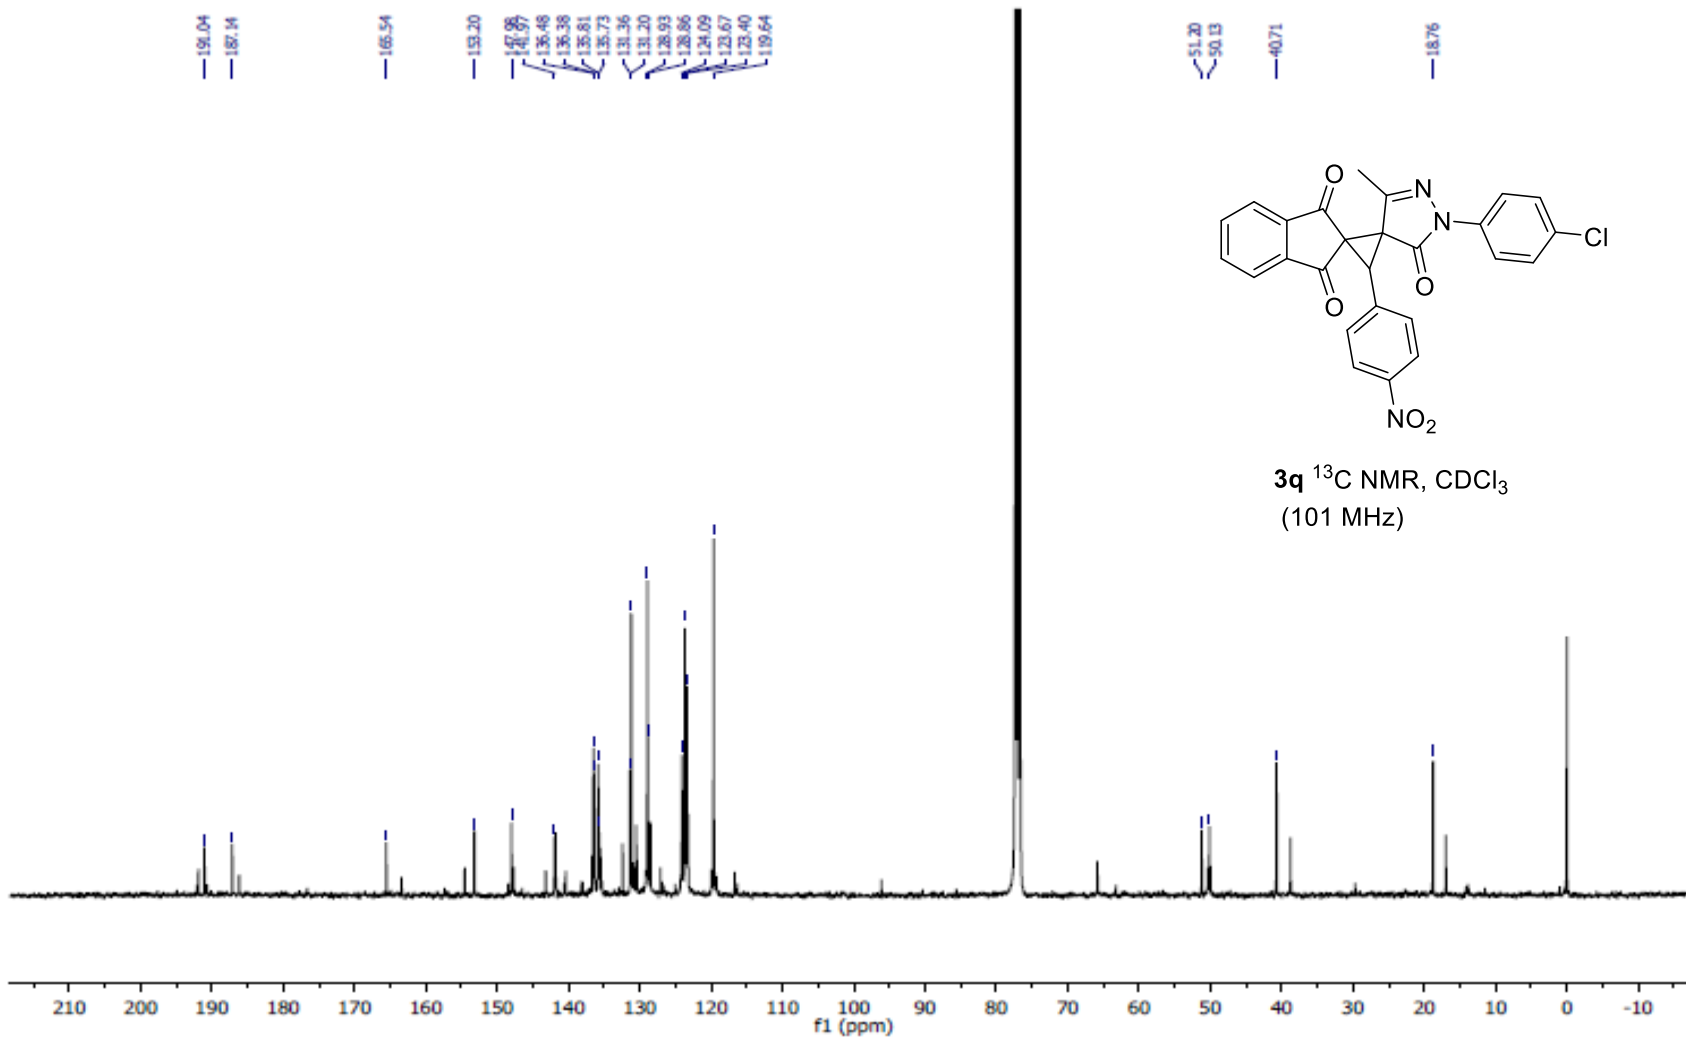

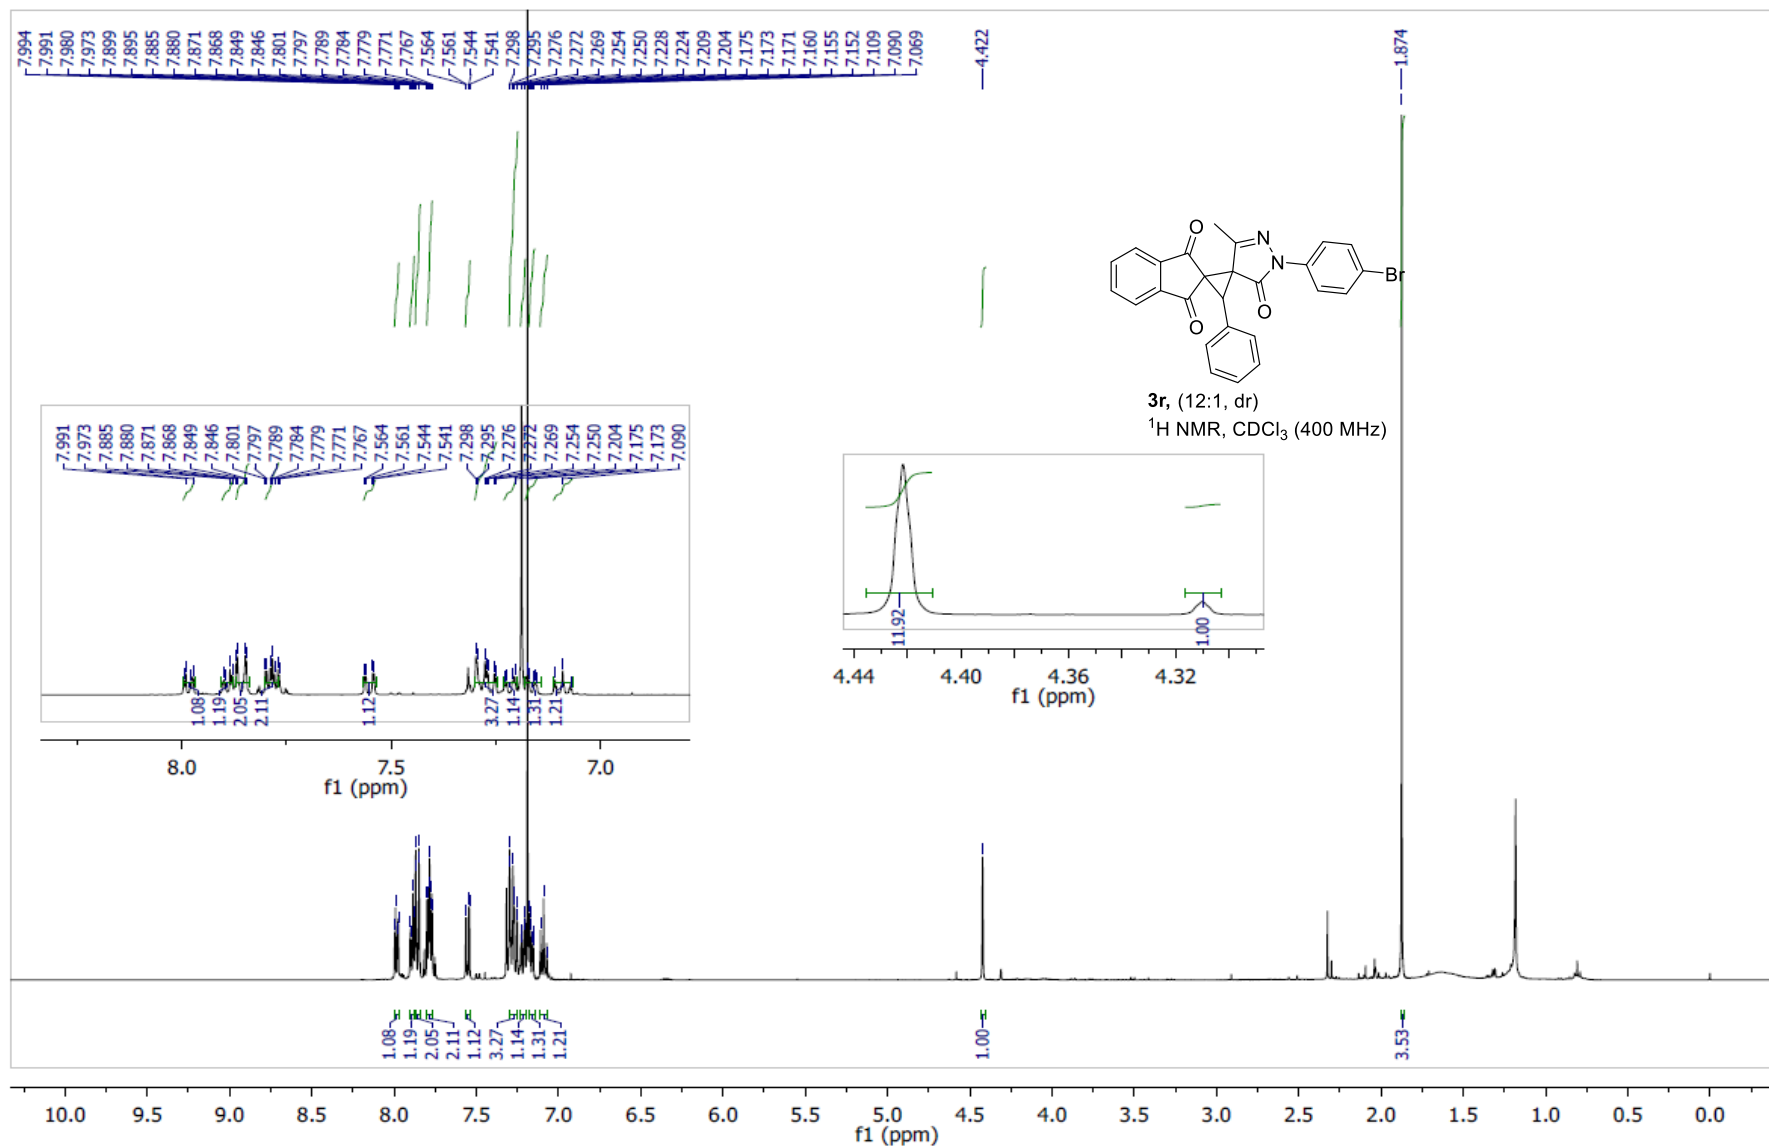

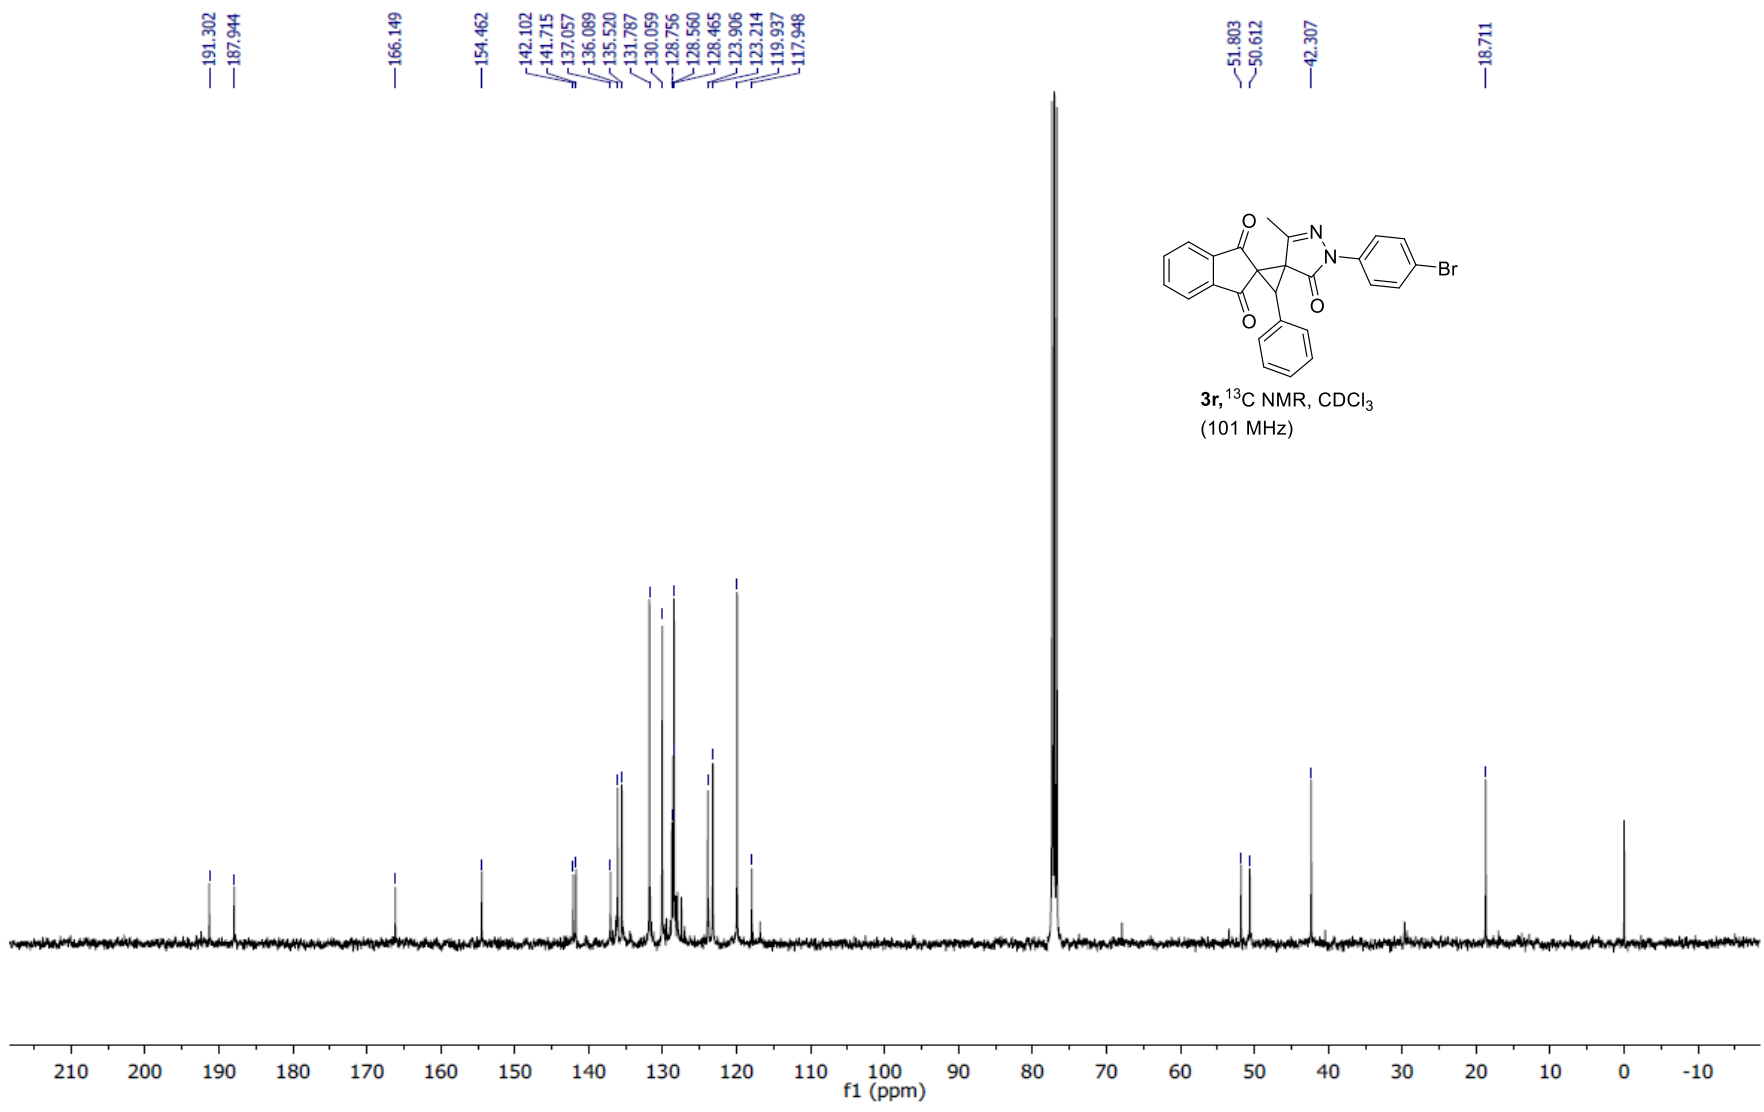

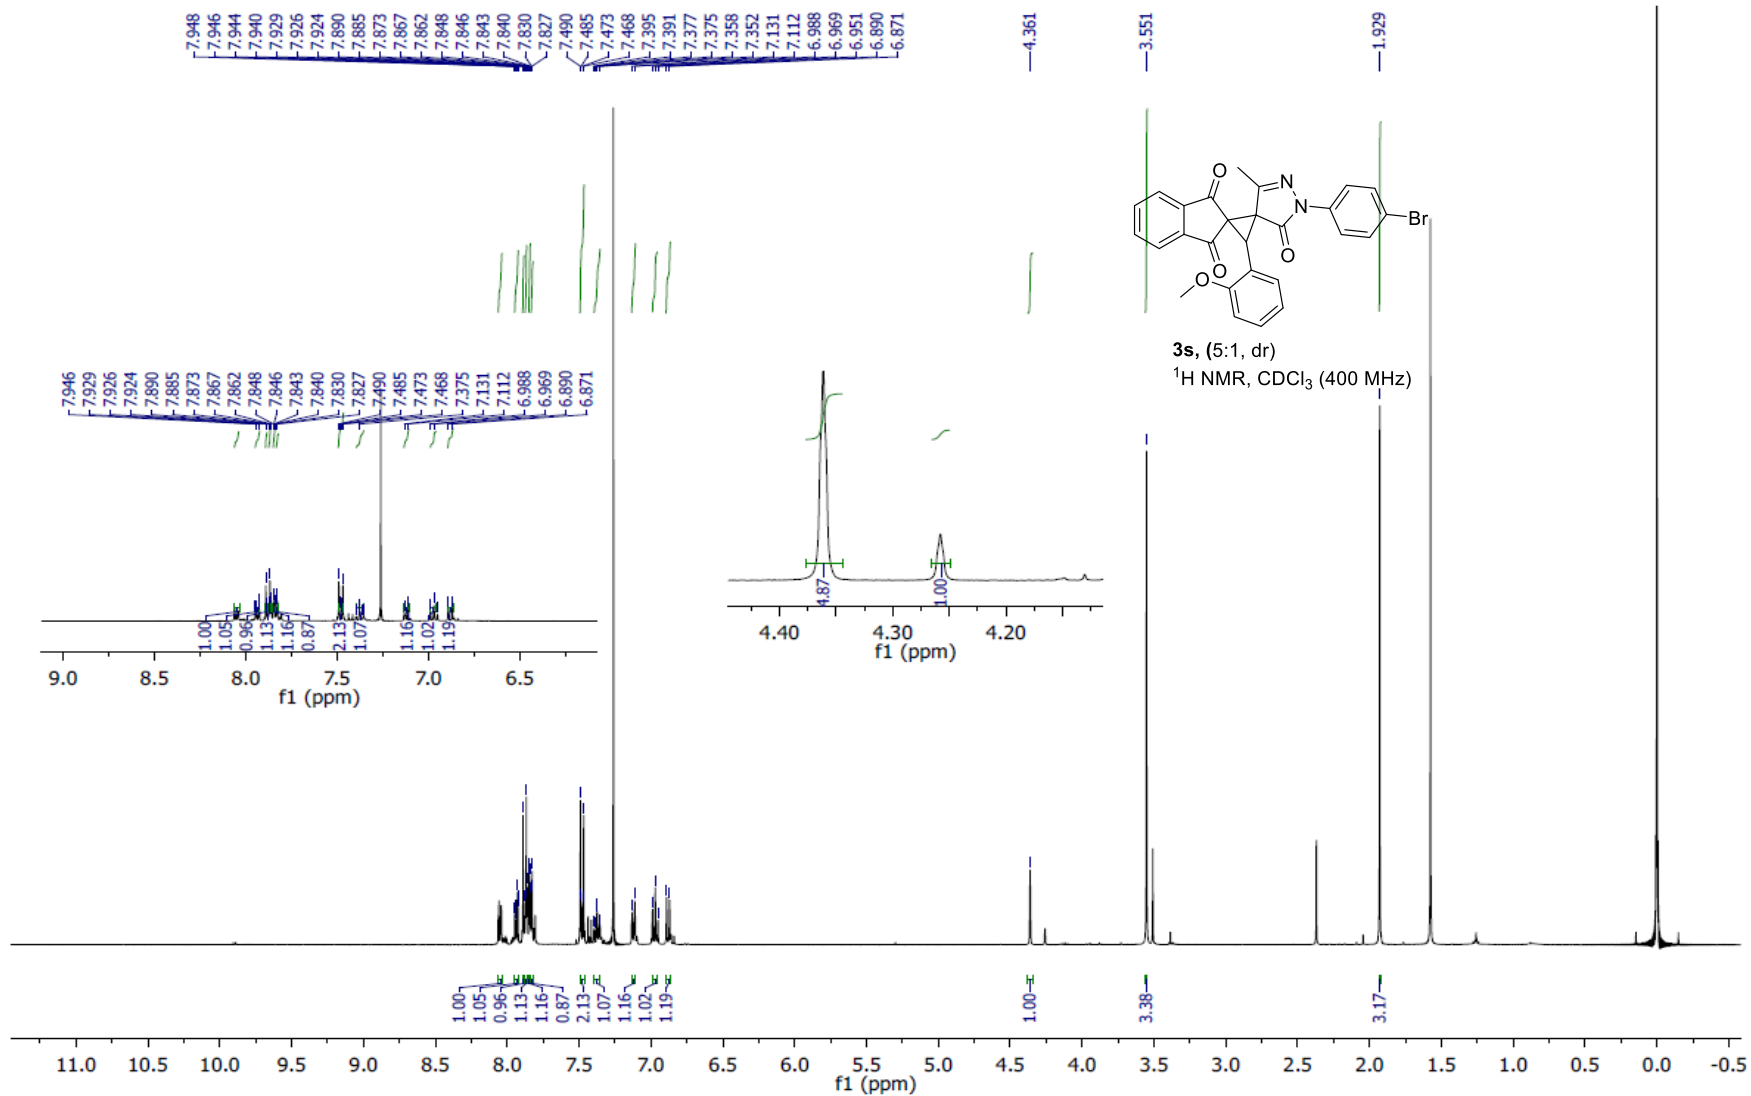

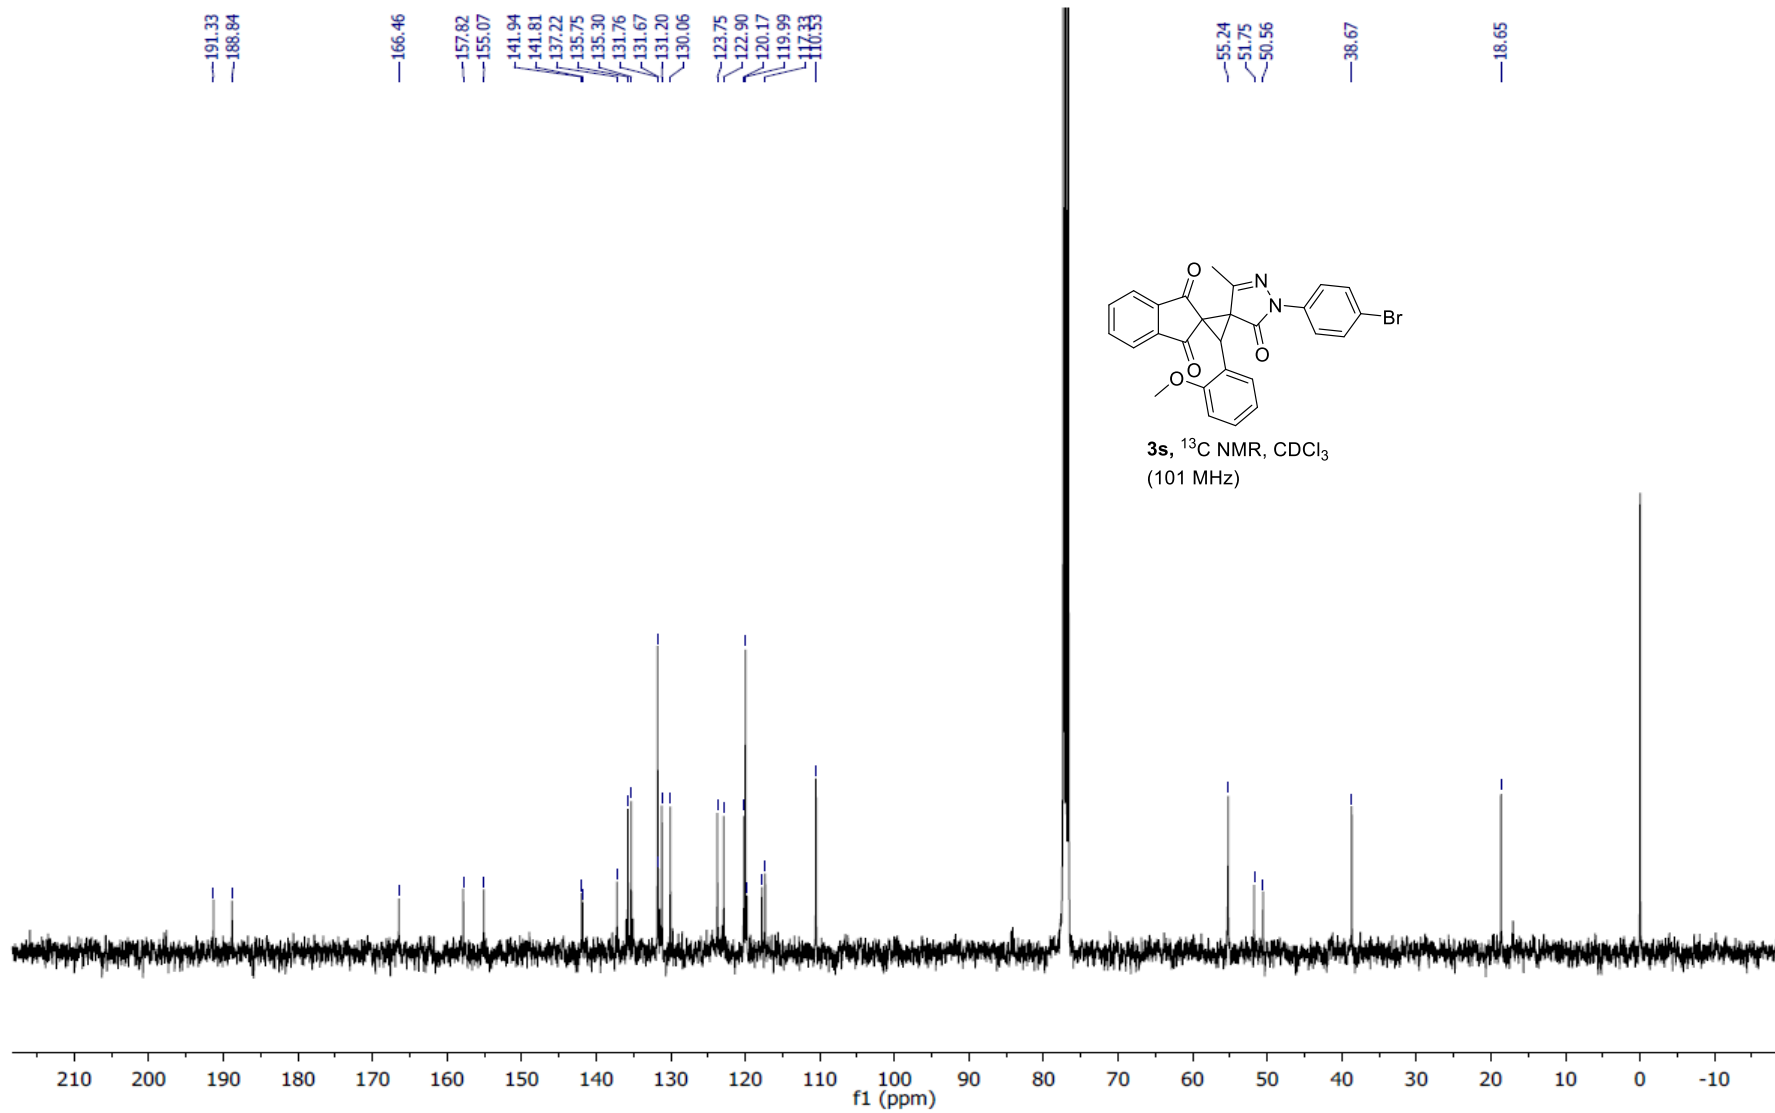

### Single Crystal XRD Experiments:

The single crystal XRD data collection and data reduction were performed using CrysAlis PRO on a single crystal Rigaku Oxford XtaLab Pro diffractometer. The crystals were kept at 93(2) K during data collection using CuK $\alpha$  ( $\lambda = 1.54184\text{\AA}$ ) radiation. Using Olex2 [1], the structure was solved with the ShelXT [2] structure solution program using Intrinsic Phasing and refined with the ShelXL [3] refinement package using Least Squares minimization.

### Single Crystal structure, Cell parameters and structure data of compound-3a:

The crystal data of **compound 3a** obtained as colorless crystal from dichloromethane solution. The **compound 3a** (C<sub>26</sub>H<sub>18</sub>N<sub>2</sub>O<sub>3</sub>) crystallized in Triclinic P2<sub>1</sub>/n space group. The ORTEP crystal structure diagram of the compound is given in the **figure 1**.

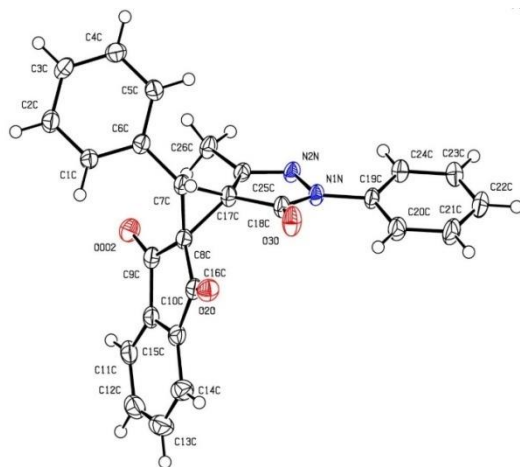

**Figure 1:** The single crystal ORTEP diagrams (CCDC number 2072747) of compound **3a**.

**Table 1: Crystal data and structure refinement for compound-3a.**

|                                    |                                                               |
|------------------------------------|---------------------------------------------------------------|
| Empirical formula                  | C <sub>26</sub> H <sub>18</sub> N <sub>2</sub> O <sub>3</sub> |
| Formula weight                     | 406.42                                                        |
| Temperature/K                      | 293(2)                                                        |
| Crystal system                     | Triclinic                                                     |
| Space group                        | P -1                                                          |
| a/Å                                | 8.4393(2)                                                     |
| b/Å                                | 8.5659(1)                                                     |
| c/Å                                | 14.2744(4)                                                    |
| α/°                                | 97.421 (2)                                                    |
| β/°                                | 95.373(2)                                                     |
| γ/°                                | 101.685 (2)                                                   |
| Volume/Å <sup>3</sup>              | 994.39 (4)                                                    |
| Z                                  | 4                                                             |
| ρ <sub>calc</sub> /cm <sup>3</sup> | 1.357                                                         |



|                                                |                                                               |
|------------------------------------------------|---------------------------------------------------------------|
| $\mu/\text{mm}^{-1}$                           | 0.726                                                         |
| F(000)                                         | 424.0                                                         |
| Crystal size/ $\text{mm}^3$                    | $0.1 \times 0.1 \times 0.1$                                   |
| Radiation                                      | $\text{CuK}\alpha$ ( $\lambda = 1.54184$ )                    |
| $2\Theta$ range for data collection/ $^\circ$  | 10.67 to 159.682                                              |
| Index ranges                                   | $-10 \leq h \leq 10, -10 \leq k \leq 7, -18 \leq l \leq 17$   |
| Reflections collected                          | 10645                                                         |
| Independent reflections                        | 4180 [ $R_{\text{int}} = 0.0305, R_{\text{sigma}} = 0.0380$ ] |
| Data/restraints/parameters                     | 4180/0/281                                                    |
| Goodness-of-fit on $F^2$                       | 1.115                                                         |
| Final R indexes [ $I \geq 2\sigma(I)$ ]        | $R_1 = 0.0538, wR_2 = 0.1563$                                 |
| Final R indexes [all data]                     | $R_1 = 0.0581, wR_2 = 0.1585$                                 |
| Largest diff. peak/hole / $e \text{ \AA}^{-3}$ | 0.23/-0.26                                                    |

**Table 2: Fractional Atomic Coordinates ( $\times 10^4$ ) and Equivalent Isotropic Displacement Parameters ( $\text{\AA}^2 \times 10^3$ ) for compound 3a.  $U_{eq}$  is defined as 1/3 of the trace of the orthogonalised  $U_{ij}$  tensor.**

| Atom   | $x$     | $y$      | $z$         | $U_{eq}$ |
|--------|---------|----------|-------------|----------|
| O(2)   | 6213(2) | 6781(2)  | 5420.2(11)  | 31.0(4)  |
| O(1)   | 1859(2) | 5038(2)  | 7142.5(12)  | 33.2(4)  |
| O(3)   | 8228(2) | 7964(2)  | 7135.8(12)  | 36.0(4)  |
| N(1)   | 6009(2) | 8156(2)  | 9064.5(13)  | 23.2(4)  |
| N(2)   | 7222(2) | 8797(2)  | 8527.0(12)  | 22.7(4)  |
| C(20)  | 8350(3) | 10252(2) | 8936.0(15)  | 23.3(4)  |
| C(26)  | 5125(3) | 6845(2)  | 8580.2(15)  | 22.0(4)  |
| C(11)  | 5579(3) | 4873(2)  | 7037.2(15)  | 22.6(4)  |
| C(1AA) | 3500(3) | 7283(3)  | 5428.7(15)  | 26.0(5)  |
| C(0AA) | 4977(3) | 6743(3)  | 5792.3(15)  | 24.7(4)  |
| C(10)  | 4563(3) | 5959(2)  | 6661.0(15)  | 22.9(4)  |
| C(9)   | 2737(3) | 5782(3)  | 6650.9(15)  | 25.3(4)  |
| C(12)  | 4844(3) | 3298(2)  | 7336.0(15)  | 23.2(4)  |
| C(18)  | 5710(3) | 6489(2)  | 7641.8(15)  | 23.2(4)  |
| C(7)   | 2199(3) | 6682(3)  | 5902.0(15)  | 25.7(5)  |
| C(27)  | 3799(3) | 5914(3)  | 9038.5(16)  | 26.5(5)  |
| C(15)  | 3500(3) | 335(3)   | 7854.2(16)  | 28.4(5)  |
| C(14)  | 2865(3) | 764(3)   | 7023.2(16)  | 29.4(5)  |
| C(17)  | 5501(3) | 2832(3)  | 8156.7(16)  | 26.8(5)  |
| C(25)  | 8399(3) | 10828(3) | 9896.3(16)  | 26.2(5)  |
| C(16)  | 4814(3) | 1364(3)  | 8424.2(16)  | 29.0(5)  |
| C(19)  | 7220(3) | 7817(3)  | 7691.8(15)  | 24.5(4)  |
| C(6)   | 646(3)  | 6944(3)  | 5668.2(17)  | 30.4(5)  |
| C(24)  | 9498(3) | 12250(3) | 10295.6(17) | 29.1(5)  |
| C(21)  | 9383(3) | 11085(3) | 8377.7(17)  | 31.8(5)  |
| C(13)  | 3536(3) | 2248(3)  | 6765.7(15)  | 26.1(5)  |

|       |          |          |            |         |
|-------|----------|----------|------------|---------|
| C(23) | 10535(3) | 13092(3) | 9746.3(19) | 33.4(5) |
| C(3)  | 3300(3)  | 8199(3)  | 4702.3(16) | 32.4(5) |
| C(5)  | 457(3)   | 7866(3)  | 4950.6(18) | 37.4(6) |
| C(22) | 10472(3) | 12506(3) | 8792.2(19) | 37.1(6) |
| C(4)  | 1765(4)  | 8493(3)  | 4481.1(18) | 39.0(6) |

**Table 3: Anisotropic Displacement Parameters ( $\text{\AA}^2 \times 10^3$ ) for compound 3a. The Anisotropic displacement factor exponent takes the form:  $-2\pi^2[h^2a^{*2}U_{11}+2hka^*b^*U_{12}+\dots]$ .**

| Atom   | $U_{11}$ | $U_{22}$ | $U_{33}$ | $U_{23}$ | $U_{13}$ | $U_{12}$ |
|--------|----------|----------|----------|----------|----------|----------|
| O(2)   | 32.7(9)  | 32.5(9)  | 28.0(8)  | 7.9(7)   | 8.7(7)   | 3.2(7)   |
| O(1)   | 27.1(8)  | 33.0(9)  | 37.8(9)  | 11.1(7)  | 6.6(7)   | -2.0(7)  |
| O(3)   | 31.0(9)  | 35.9(9)  | 34.4(9)  | -3.7(7)  | 14.6(7)  | -7.5(7)  |
| N(1)   | 22.8(9)  | 20.6(9)  | 23.9(9)  | 4.5(7)   | 6.0(7)   | -2.5(7)  |
| N(2)   | 20.2(8)  | 21.4(9)  | 22.7(9)  | 2.8(7)   | 5.7(7)   | -5.0(7)  |
| C(20)  | 21.2(10) | 17.7(10) | 27.3(11) | 1.5(8)   | 1.3(8)   | -2.9(8)  |
| C(26)  | 21.9(10) | 19.3(10) | 23.6(10) | 4.3(8)   | 3.5(8)   | 0.8(8)   |
| C(11)  | 23.1(10) | 20.8(10) | 21.4(10) | 1.7(8)   | 4.1(8)   | -0.5(8)  |
| C(1AA) | 32.5(12) | 20.4(10) | 22.5(10) | -0.6(8)  | 2.1(9)   | 2.5(8)   |
| C(0AA) | 27.8(11) | 19.8(10) | 22.9(10) | 0.5(8)   | 3.5(8)   | -1.6(8)  |
| C(10)  | 24.1(10) | 20.3(10) | 21.6(10) | 2.2(8)   | 2.5(8)   | -1.0(8)  |
| C(9)   | 25.1(11) | 20.9(10) | 26.1(11) | 0.5(8)   | 2.7(8)   | -1.8(8)  |
| C(12)  | 25.5(10) | 19.9(10) | 23.2(10) | 1.8(8)   | 4.4(8)   | 3.0(8)   |
| C(18)  | 21.7(10) | 21.2(10) | 23.8(10) | 1.1(8)   | 3.5(8)   | -1.3(8)  |
| C(7)   | 27.1(11) | 20.2(10) | 25.4(10) | -1.8(8)  | 0.0(8)   | -0.3(8)  |
| C(27)  | 26.1(11) | 22.7(10) | 28.1(11) | 3.7(8)   | 8.8(9)   | -2.8(8)  |
| C(15)  | 36.9(12) | 18.8(10) | 29.2(11) | 4.9(8)   | 8.3(9)   | 2.7(9)   |
| C(14)  | 33.7(12) | 23.0(11) | 27.1(11) | 0.2(8)   | 2.5(9)   | -1.0(9)  |

|       |          |          |          |          |          |           |
|-------|----------|----------|----------|----------|----------|-----------|
| C(17) | 26.8(11) | 25.3(11) | 26.1(11) | 0.8(8)   | -0.4(9)  | 3.9(8)    |
| C(25) | 23.4(11) | 23.8(11) | 28.4(11) | 0.5(8)   | 4.6(9)   | 0.1(8)    |
| C(16) | 37.0(13) | 25.6(11) | 25.1(11) | 5.0(9)   | 2.4(9)   | 8.7(9)    |
| C(19) | 21.7(10) | 23.4(10) | 24.9(10) | 1.6(8)   | 4.0(8)   | -2.1(8)   |
| C(6)  | 28.1(11) | 24.9(11) | 32.8(12) | -3.9(9)  | -2.7(9)  | 1.5(9)    |
| C(24) | 25.9(11) | 24.9(11) | 32.0(12) | -4.2(9)  | 1.1(9)   | 1.4(9)    |
| C(21) | 33.0(12) | 29.0(12) | 28.0(11) | 4.4(9)   | 4.4(9)   | -6.3(9)   |
| C(13) | 30.5(11) | 23.1(10) | 21.7(10) | 3.5(8)   | 0.4(8)   | 0.0(8)    |
| C(23) | 28.4(12) | 21.3(11) | 44.5(14) | -0.7(9)  | 2.5(10)  | -3.8(9)   |
| C(3)  | 44.1(14) | 29.7(12) | 24.2(11) | 4.3(9)   | 4.0(10)  | 10.2(10)  |
| C(5)  | 39.6(14) | 33.3(13) | 35.4(13) | -3.6(10) | -8.4(11) | 10.3(11)  |
| C(22) | 36.1(13) | 28.1(12) | 39.9(14) | 6.6(10)  | 6.8(11)  | -11.5(10) |
| C(4)  | 52.1(16) | 37.9(14) | 27.5(12) | 3.8(10)  | -3.9(11) | 15.7(12)  |

**Table 4: Bond Lengths for compound 3a.**

| Atom  | Atom   | Length/Å | Atom  | Atom  | Length/Å |
|-------|--------|----------|-------|-------|----------|
| O(2)  | C(0AA) | 1.211(3) | C(10) | C(9)  | 1.517(3) |
| O(1)  | C(9)   | 1.212(3) | C(10) | C(18) | 1.583(3) |
| O(3)  | C(19)  | 1.216(3) | C(9)  | C(7)  | 1.485(3) |
| N(1)  | N(2)   | 1.402(2) | C(12) | C(17) | 1.388(3) |
| N(1)  | C(26)  | 1.288(3) | C(12) | C(13) | 1.389(3) |
| N(2)  | C(20)  | 1.424(3) | C(18) | C(19) | 1.516(3) |
| N(2)  | C(19)  | 1.366(3) | C(7)  | C(6)  | 1.392(3) |
| C(20) | C(25)  | 1.389(3) | C(15) | C(14) | 1.379(3) |
| C(20) | C(21)  | 1.389(3) | C(15) | C(16) | 1.385(3) |
| C(26) | C(18)  | 1.487(3) | C(14) | C(13) | 1.393(3) |

|        |        |          |       |       |          |
|--------|--------|----------|-------|-------|----------|
| C(26)  | C(27)  | 1.492(3) | C(17) | C(16) | 1.391(3) |
| C(11)  | C(10)  | 1.501(3) | C(25) | C(24) | 1.390(3) |
| C(11)  | C(12)  | 1.498(3) | C(6)  | C(5)  | 1.389(4) |
| C(11)  | C(18)  | 1.512(3) | C(24) | C(23) | 1.385(3) |
| C(1AA) | C(0AA) | 1.487(3) | C(21) | C(22) | 1.391(3) |
| C(1AA) | C(7)   | 1.388(3) | C(23) | C(22) | 1.382(4) |
| C(1AA) | C(3)   | 1.396(3) | C(3)  | C(4)  | 1.385(4) |
| C(0AA) | C(10)  | 1.521(3) | C(5)  | C(4)  | 1.396(4) |

**Table 5: Bond Angles for compound 3a.**

| Atom  | Atom   | Atom   | Angle/°    | Atom   | Atom  | Atom  | Angle/°    |
|-------|--------|--------|------------|--------|-------|-------|------------|
| C(26) | N(1)   | N(2)   | 108.86(17) | C(17)  | C(12) | C(13) | 119.1(2)   |
| N(1)  | N(2)   | C(20)  | 118.11(17) | C(13)  | C(12) | C(11) | 119.99(19) |
| C(19) | N(2)   | N(1)   | 112.79(16) | C(26)  | C(18) | C(11) | 128.79(18) |
| C(19) | N(2)   | C(20)  | 128.85(17) | C(26)  | C(18) | C(10) | 124.45(18) |
| C(25) | C(20)  | N(2)   | 119.25(18) | C(26)  | C(18) | C(19) | 103.03(17) |
| C(21) | C(20)  | N(2)   | 120.17(19) | C(11)  | C(18) | C(10) | 57.99(13)  |
| C(21) | C(20)  | C(25)  | 120.6(2)   | C(11)  | C(18) | C(19) | 120.15(18) |
| N(1)  | C(26)  | C(18)  | 110.89(18) | C(19)  | C(18) | C(10) | 117.97(18) |
| N(1)  | C(26)  | C(27)  | 117.93(19) | C(1AA) | C(7)  | C(9)  | 110.4(2)   |
| C(18) | C(26)  | C(27)  | 131.09(19) | C(1AA) | C(7)  | C(6)  | 121.8(2)   |
| C(10) | C(11)  | C(18)  | 63.39(14)  | C(6)   | C(7)  | C(9)  | 127.9(2)   |
| C(12) | C(11)  | C(10)  | 122.59(18) | C(14)  | C(15) | C(16) | 120.2(2)   |
| C(12) | C(11)  | C(18)  | 123.30(18) | C(15)  | C(14) | C(13) | 119.7(2)   |
| C(7)  | C(1AA) | C(0AA) | 109.89(19) | C(12)  | C(17) | C(16) | 120.4(2)   |
| C(7)  | C(1AA) | C(3)   | 120.9(2)   | C(20)  | C(25) | C(24) | 119.3(2)   |
| C(3)  | C(1AA) | C(0AA) | 129.1(2)   | C(15)  | C(16) | C(17) | 119.9(2)   |

|        |        |        |            |       |       |        |            |
|--------|--------|--------|------------|-------|-------|--------|------------|
| O(2)   | C(0AA) | C(1AA) | 126.7(2)   | O(3)  | C(19) | N(2)   | 127.53(19) |
| O(2)   | C(0AA) | C(10)  | 126.3(2)   | O(3)  | C(19) | C(18)  | 128.5(2)   |
| C(1AA) | C(0AA) | C(10)  | 106.64(18) | N(2)  | C(19) | C(18)  | 103.97(17) |
| C(11)  | C(10)  | C(0AA) | 120.42(19) | C(5)  | C(6)  | C(7)   | 117.1(2)   |
| C(11)  | C(10)  | C(9)   | 126.82(18) | C(23) | C(24) | C(25)  | 120.7(2)   |
| C(11)  | C(10)  | C(18)  | 58.62(13)  | C(20) | C(21) | C(22)  | 119.2(2)   |
| C(0AA) | C(10)  | C(18)  | 121.00(17) | C(12) | C(13) | C(14)  | 120.6(2)   |
| C(9)   | C(10)  | C(0AA) | 105.15(18) | C(22) | C(23) | C(24)  | 119.4(2)   |
| C(9)   | C(10)  | C(18)  | 119.36(18) | C(4)  | C(3)  | C(1AA) | 117.5(2)   |
| O(1)   | C(9)   | C(10)  | 127.5(2)   | C(6)  | C(5)  | C(4)   | 121.4(2)   |
| O(1)   | C(9)   | C(7)   | 125.7(2)   | C(23) | C(22) | C(21)  | 120.9(2)   |
| C(7)   | C(9)   | C(10)  | 106.77(18) | C(3)  | C(4)  | C(5)   | 121.3(2)   |
| C(17)  | C(12)  | C(11)  | 120.88(19) |       |       |        |            |

**Table 6: Hydrogen Atom Coordinates ( $\text{\AA}\times 10^4$ ) and Isotropic Displacement Parameters ( $\text{\AA}^2\times 10^3$ ) for compound 3a.**

| Atom   | <i>x</i> | <i>y</i> | <i>z</i> | U(eq) |
|--------|----------|----------|----------|-------|
| H(11)  | 6532.51  | 4823.57  | 6701.26  | 27    |
| H(27A) | 3837.16  | 6419.48  | 9683.36  | 40    |
| H(27B) | 3946.65  | 4831.17  | 9035.09  | 40    |
| H(27C) | 2761.89  | 5892.65  | 8692.19  | 40    |
| H(15)  | 3044.24  | -648.46  | 8032.45  | 34    |
| H(14)  | 1993.35  | 64.61    | 6636.5   | 35    |
| H(17)  | 6405.01  | 3506.05  | 8529.68  | 32    |
| H(25)  | 7704.03  | 10267.97 | 10267.82 | 31    |
| H(16)  | 5236.46  | 1073.16  | 8985.36  | 35    |
| H(6)   | -225.96  | 6520.18  | 5978.85  | 36    |
| H(24)  | 9537.45  | 12639.97 | 10938.27 | 35    |

|       |          |          |          |    |
|-------|----------|----------|----------|----|
| H(21) | 9347.21  | 10697.71 | 7734.92  | 38 |
| H(13) | 3104.85  | 2538.81  | 6206.7   | 31 |
| H(23) | 11266.15 | 14043.09 | 10017.39 | 40 |
| H(3)  | 4165.51  | 8596.52  | 4379.18  | 39 |
| H(5)  | -563.93  | 8071.03  | 4779.35  | 45 |
| H(22) | 11166.7  | 13068.44 | 8422.15  | 45 |
| H(4)  | 1602.62  | 9119.85  | 4010.29  | 47 |

### Single Crystal structure, Cell parameters and structure data of compound-3p:

The crystal data of **compound 3p** obtained as colorless crystal from dichloromethane solution. The **compound 3p** ( $C_{26}H_{17}ClN_2O_3$ ) crystallized in monoclinic  $P2_1/n$  space group. The ORTEP crystal structure diagram of the compound is given in the **figure 2**.

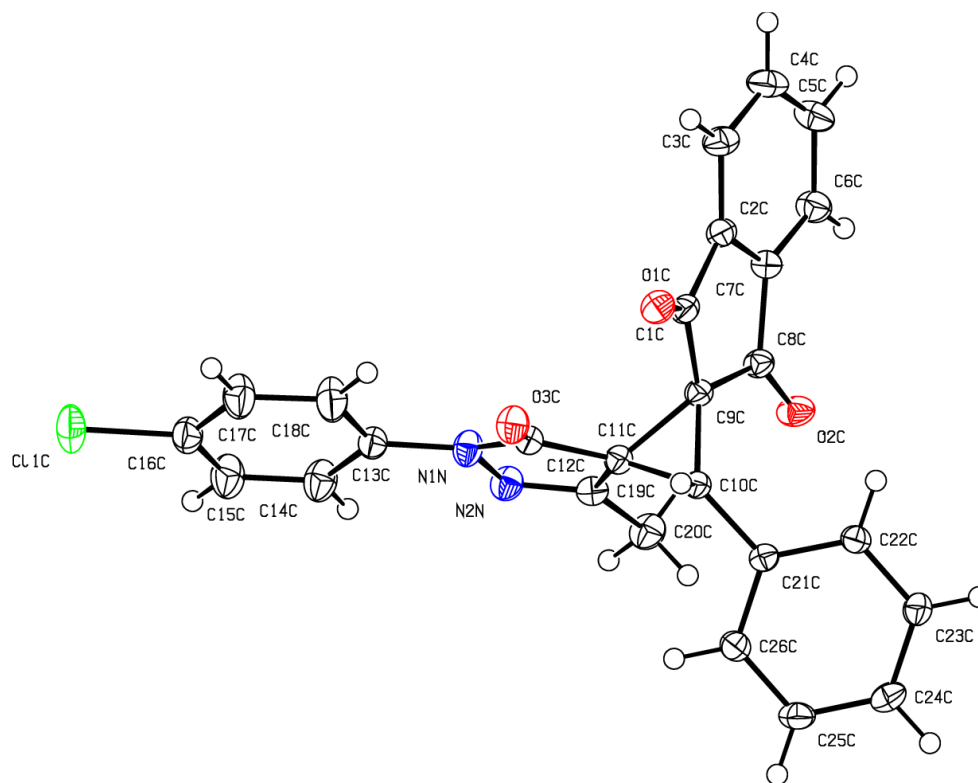

**Figure 2:** The single crystal ORTEP diagrams (CCDC number 2101428) of compound **3p**.



**Table 1 Crystal data and structure refinement for 3P.**

|                       |                                                                 |
|-----------------------|-----------------------------------------------------------------|
| Empirical formula     | C <sub>26</sub> H <sub>17</sub> ClN <sub>2</sub> O <sub>3</sub> |
| Formula weight        | 440.883                                                         |
| Temperature/K         | 293(2)                                                          |
| Crystal system        | monoclinic                                                      |
| Space group           | P2 <sub>1</sub> /n                                              |
| a/Å                   | 12.8370(2)                                                      |
| b/Å                   | 10.83450(10)                                                    |
| c/Å                   | 16.2470(2)                                                      |
| α/°                   | 90                                                              |
| β/°                   | 112.647(2)                                                      |
| γ/°                   | 90                                                              |
| Volume/Å <sup>3</sup> | 2085.44(5)                                                      |
| Z                     | 9                                                               |

|                                                |                                                               |
|------------------------------------------------|---------------------------------------------------------------|
| $\rho_{\text{calc}}/\text{cm}^3$               | 1.404                                                         |
| $\mu/\text{mm}^{-1}$                           | 1.889                                                         |
| F(000)                                         | 912.0                                                         |
| Crystal size/ $\text{mm}^3$                    | $0.1 \times 0.1 \times 0.05$                                  |
| Radiation                                      | $\text{CuK}\alpha$ ( $\lambda = 1.54184$ )                    |
| $2\Theta$ range for data collection/ $^\circ$  | 10.072 to 159.948                                             |
| Index ranges                                   | $-16 \leq h \leq 14, -13 \leq k \leq 10, -20 \leq l \leq 16$  |
| Reflections collected                          | 13423                                                         |
| Independent reflections                        | 4437 [ $R_{\text{int}} = 0.0335, R_{\text{sigma}} = 0.0362$ ] |
| Data/restraints/parameters                     | 4437/0/290                                                    |
| Goodness-of-fit on $F^2$                       | 1.077                                                         |
| Final R indexes [ $I \geq 2\sigma(I)$ ]        | $R_1 = 0.0415, wR_2 = 0.1092$                                 |
| Final R indexes [all data]                     | $R_1 = 0.0444, wR_2 = 0.1115$                                 |
| Largest diff. peak/hole / $e \text{ \AA}^{-3}$ | 0.31/-0.46                                                    |

**Table 2 Fractional Atomic Coordinates ( $\times 10^4$ ) and Equivalent Isotropic Displacement Parameters ( $\text{\AA}^2 \times 10^3$ ) for 3P.  $U_{eq}$  is defined as 1/3 of the trace of the orthogonalised  $U_{ij}$  tensor.**

| Atom | <i>x</i>   | <i>y</i>   | <i>z</i>   | $U_{eq}$  |
|------|------------|------------|------------|-----------|
| Cl1C | 5577.5(4)  | -1475.4(4) | 7419.4(3)  | 39.59(14) |
| O1C  | 9721.3(8)  | 4047.8(10) | 5621.5(7)  | 24.5(2)   |
| O2C  | 6740.9(9)  | 6686.9(10) | 3936.0(7)  | 26.9(2)   |
| O3C  | 8179.7(9)  | 2090.6(10) | 5318.4(7)  | 26.1(2)   |
| N1N  | 6393.1(10) | 2547.1(12) | 5276.2(8)  | 24.2(3)   |
| N2N  | 5477.0(10) | 3284.5(13) | 4750.9(8)  | 25.0(3)   |
| C1C  | 9017.4(11) | 4857.1(13) | 5437.5(9)  | 19.5(3)   |
| C2C  | 9113.7(12) | 6062.6(14) | 5890.1(9)  | 20.8(3)   |
| C3C  | 9943.6(13) | 6468.7(15) | 6685.8(10) | 25.7(3)   |
| C4C  | 9906.8(13) | 7691.9(17) | 6927.4(11) | 30.9(4)   |
| C5C  | 9075.7(14) | 8488.6(16) | 6384.9(11) | 31.7(4)   |
| C6C  | 8235.4(13) | 8085.3(15) | 5601.0(10) | 26.7(3)   |
| C7C  | 8267.7(12) | 6857.0(14) | 5364.2(9)  | 21.1(3)   |
| C8C  | 7510.4(12) | 6217.0(13) | 4549.4(9)  | 20.1(3)   |
| C9C  | 7907.2(11) | 4890.6(13) | 4627.7(9)  | 18.4(3)   |
| C10C | 7683.0(11) | 4019.2(13) | 3864.0(9)  | 18.1(3)   |
| C11C | 7021.6(12) | 3809.4(13) | 4443.5(9)  | 19.3(3)   |
| C12C | 7328.8(12) | 2719.5(13) | 5071.7(9)  | 20.6(3)   |
| C13C | 6197.9(13) | 1591.9(14) | 5796.6(10) | 23.3(3)   |
| C14C | 5103.8(14) | 1317.6(17) | 5704.4(12) | 31.9(4)   |
| C15C | 4906.6(14) | 377.6(18)  | 6202.8(12) | 35.0(4)   |
| C16C | 5803.9(14) | -292.1(15) | 6783.5(11) | 28.6(3)   |
| C17C | 6894.8(15) | -14.5(17)  | 6889.3(12) | 35.9(4)   |
| C18C | 7099.1(14) | 936.0(17)  | 6400.4(12) | 35.6(4)   |
| C19C | 5803.9(12) | 4008.7(14) | 4268.3(9)  | 21.5(3)   |
| C20C | 4954.7(13) | 4834.6(16) | 3617.5(10) | 27.6(3)   |

|      |            |            |            |         |
|------|------------|------------|------------|---------|
| C21C | 7180.8(11) | 4391.5(13) | 2899.7(9)  | 18.3(3) |
| C22C | 7608.9(12) | 5403.2(13) | 2603.0(9)  | 21.0(3) |
| C23C | 7217.9(12) | 5665.4(14) | 1694.7(9)  | 23.3(3) |
| C24C | 6395.8(12) | 4931.7(15) | 1081.8(9)  | 24.9(3) |
| C25C | 5969.7(13) | 3918.8(15) | 1371.1(10) | 25.6(3) |
| C26C | 6365.6(12) | 3652.4(14) | 2278.9(10) | 22.5(3) |

**Table 3 Anisotropic Displacement Parameters ( $\text{\AA}^2 \times 10^3$ ) for 3P. The Anisotropic displacement factor exponent takes the form: -  $2\pi^2[h^2a^{*2}U_{11}+2hka^*b^*U_{12}+\dots]$ .**

| Atom | $U_{11}$ | $U_{22}$ | $U_{33}$ | $U_{23}$ | $U_{13}$ | $U_{12}$  |
|------|----------|----------|----------|----------|----------|-----------|
| C11C | 49.9(3)  | 31.9(2)  | 46.7(3)  | 9.92(18) | 29.3(2)  | -3.76(17) |
| O1C  | 22.0(5)  | 25.7(6)  | 23.1(5)  | 3.3(4)   | 5.7(4)   | 4.4(4)    |
| O2C  | 27.7(5)  | 24.0(5)  | 21.2(5)  | 0.1(4)   | 0.9(4)   | 6.1(4)    |
| O3C  | 24.9(5)  | 24.3(5)  | 29.4(5)  | 5.9(4)   | 10.9(4)  | 6.0(4)    |
| N1N  | 21.8(6)  | 25.4(6)  | 25.8(6)  | 6.8(5)   | 9.7(5)   | 3.2(5)    |
| N2N  | 21.6(6)  | 27.5(7)  | 24.5(6)  | 3.7(5)   | 7.5(5)   | 2.8(5)    |
| C1C  | 18.7(6)  | 22.7(7)  | 16.6(6)  | 2.2(5)   | 6.1(5)   | 0.2(5)    |
| C2C  | 20.0(6)  | 24.6(7)  | 17.6(6)  | -0.6(5)  | 7.0(5)   | -1.8(5)   |
| C3C  | 20.8(7)  | 32.8(8)  | 20.6(7)  | -2.6(6)  | 4.8(6)   | -0.6(6)   |
| C4C  | 25.2(7)  | 37.8(9)  | 25.5(7)  | -10.9(7) | 5.2(6)   | -6.8(6)   |
| C5C  | 33.3(8)  | 26.1(8)  | 32.1(8)  | -9.7(7)  | 8.5(7)   | -5.8(6)   |
| C6C  | 27.4(7)  | 23.8(8)  | 26.1(7)  | -2.3(6)  | 7.2(6)   | 0.0(6)    |
| C7C  | 21.2(6)  | 21.6(7)  | 19.1(6)  | -1.5(5)  | 6.3(5)   | -1.8(5)   |
| C8C  | 20.8(6)  | 19.6(7)  | 17.9(6)  | 0.4(5)   | 5.2(5)   | 1.9(5)    |
| C9C  | 19.2(6)  | 17.7(7)  | 16.3(6)  | 0.6(5)   | 4.5(5)   | 0.1(5)    |
| C10C | 18.9(6)  | 17.0(6)  | 17.3(6)  | -0.3(5)  | 5.9(5)   | 0.0(5)    |
| C11C | 20.2(6)  | 19.1(7)  | 18.1(6)  | 0.9(5)   | 6.7(5)   | 0.3(5)    |

|      |         |          |         |         |         |         |
|------|---------|----------|---------|---------|---------|---------|
| C12C | 23.3(7) | 19.5(7)  | 18.7(6) | 0.0(5)  | 7.7(5)  | -1.7(5) |
| C13C | 26.9(7) | 22.5(7)  | 22.2(7) | 1.1(6)  | 11.3(6) | -1.5(6) |
| C14C | 27.3(8) | 37.0(9)  | 33.9(8) | 8.7(7)  | 14.6(7) | 2.6(7)  |
| C15C | 28.9(8) | 41.3(10) | 40.3(9) | 7.2(8)  | 19.2(7) | -2.5(7) |
| C16C | 37.6(8) | 25.1(8)  | 28.8(8) | 0.3(6)  | 19.0(7) | -3.1(6) |
| C17C | 31.2(8) | 35.2(9)  | 39.4(9) | 14.6(8) | 11.4(7) | 0.5(7)  |
| C18C | 25.8(8) | 37.7(10) | 40.7(9) | 15.8(8) | 10.0(7) | -2.0(7) |
| C19C | 20.8(6) | 22.6(7)  | 20.1(6) | -1.3(5) | 6.7(5)  | 0.2(5)  |
| C20C | 21.3(7) | 31.7(8)  | 26.0(7) | 5.1(6)  | 4.9(6)  | 5.5(6)  |
| C21C | 18.6(6) | 18.6(7)  | 17.0(6) | -0.3(5) | 6.2(5)  | 1.7(5)  |
| C22C | 21.4(6) | 19.0(7)  | 19.5(6) | -0.7(5) | 4.7(5)  | -1.8(5) |
| C23C | 26.9(7) | 20.5(7)  | 21.6(7) | 3.7(6)  | 8.3(6)  | 1.0(6)  |
| C24C | 25.1(7) | 29.4(8)  | 16.7(6) | 1.6(6)  | 4.2(6)  | 4.6(6)  |
| C25C | 24.4(7) | 27.2(8)  | 19.9(7) | -4.4(6) | 2.7(6)  | -2.3(6) |
| C26C | 22.3(7) | 20.7(7)  | 22.7(7) | -0.2(5) | 6.6(6)  | -2.0(5) |

**Table 4 Bond Lengths for 3P.**

| <b>Atom</b> | <b>Atom</b> | <b>Length/Å</b> | <b>Atom</b> | <b>Atom</b> | <b>Length/Å</b> |
|-------------|-------------|-----------------|-------------|-------------|-----------------|
| C11C        | C16C        | 1.7398(16)      | C9C         | C11C        | 1.5786(19)      |
| O1C         | C1C         | 1.2109(18)      | C10C        | C11C        | 1.5081(19)      |
| O2C         | C8C         | 1.2124(17)      | C10C        | C21C        | 1.5017(18)      |
| O3C         | C12C        | 1.2169(18)      | C11C        | C12C        | 1.5106(19)      |
| N1N         | N2N         | 1.4060(17)      | C11C        | C19C        | 1.4928(19)      |
| N1N         | C12C        | 1.3768(19)      | C13C        | C14C        | 1.386(2)        |
| N1N         | C13C        | 1.4183(19)      | C13C        | C18C        | 1.390(2)        |
| N2N         | C19C        | 1.288(2)        | C14C        | C15C        | 1.384(2)        |
| C1C         | C2C         | 1.481(2)        | C15C        | C16C        | 1.381(2)        |

|     |      |            |      |      |            |
|-----|------|------------|------|------|------------|
| C1C | C9C  | 1.5230(18) | C16C | C17C | 1.377(2)   |
| C2C | C3C  | 1.393(2)   | C17C | C18C | 1.386(2)   |
| C2C | C7C  | 1.391(2)   | C19C | C20C | 1.490(2)   |
| C3C | C4C  | 1.388(2)   | C21C | C22C | 1.393(2)   |
| C4C | C5C  | 1.391(2)   | C21C | C26C | 1.3931(19) |
| C5C | C6C  | 1.385(2)   | C22C | C23C | 1.3928(19) |
| C6C | C7C  | 1.390(2)   | C23C | C24C | 1.388(2)   |
| C7C | C8C  | 1.4790(19) | C24C | C25C | 1.386(2)   |
| C8C | C9C  | 1.5135(19) | C25C | C26C | 1.393(2)   |
| C9C | C10C | 1.4963(19) |      |      |            |

**Table 5 Bond Angles for 3P.**

| Atom | Atom | Atom | Angle/°    | Atom | Atom | Atom | Angle/°    |
|------|------|------|------------|------|------|------|------------|
| N2N  | N1N  | C13C | 118.56(12) | C10C | C11C | C12C | 118.45(12) |
| C12C | N1N  | N2N  | 112.33(12) | C12C | C11C | C9C  | 118.06(11) |
| C12C | N1N  | C13C | 127.85(13) | C19C | C11C | C9C  | 123.61(12) |
| C19C | N2N  | N1N  | 108.86(12) | C19C | C11C | C10C | 131.23(12) |
| O1C  | C1C  | C2C  | 127.19(13) | C19C | C11C | C12C | 102.93(12) |
| O1C  | C1C  | C9C  | 126.27(13) | O3C  | C12C | N1N  | 126.90(14) |
| C2C  | C1C  | C9C  | 106.22(11) | O3C  | C12C | C11C | 128.90(13) |
| C3C  | C2C  | C1C  | 128.87(14) | N1N  | C12C | C11C | 104.13(12) |
| C7C  | C2C  | C1C  | 110.16(12) | C14C | C13C | N1N  | 119.75(14) |
| C7C  | C2C  | C3C  | 120.79(14) | C14C | C13C | C18C | 120.00(15) |
| C4C  | C3C  | C2C  | 117.84(14) | C18C | C13C | N1N  | 120.25(14) |
| C3C  | C4C  | C5C  | 120.96(14) | C15C | C14C | C13C | 120.05(15) |
| C6C  | C5C  | C4C  | 121.49(15) | C16C | C15C | C14C | 119.61(15) |
| C5C  | C6C  | C7C  | 117.43(15) | C15C | C16C | C11C | 120.45(13) |

|      |      |      |            |      |      |      |            |
|------|------|------|------------|------|------|------|------------|
| C2C  | C7C  | C8C  | 110.38(13) | C17C | C16C | C11C | 118.77(13) |
| C6C  | C7C  | C2C  | 121.44(13) | C17C | C16C | C15C | 120.75(15) |
| C6C  | C7C  | C8C  | 128.11(13) | C16C | C17C | C18C | 119.90(16) |
| O2C  | C8C  | C7C  | 125.84(14) | C17C | C18C | C13C | 119.65(15) |
| O2C  | C8C  | C9C  | 127.52(13) | N2N  | C19C | C11C | 111.00(13) |
| C7C  | C8C  | C9C  | 106.62(11) | N2N  | C19C | C20C | 118.49(13) |
| C1C  | C9C  | C11C | 120.81(11) | C20C | C19C | C11C | 130.43(13) |
| C8C  | C9C  | C1C  | 105.54(11) | C22C | C21C | C10C | 120.29(12) |
| C8C  | C9C  | C11C | 119.62(12) | C22C | C21C | C26C | 119.23(13) |
| C10C | C9C  | C1C  | 121.23(12) | C26C | C21C | C10C | 120.13(13) |
| C10C | C9C  | C8C  | 125.33(12) | C21C | C22C | C23C | 119.86(13) |
| C10C | C9C  | C11C | 58.67(9)   | C24C | C23C | C22C | 120.49(14) |
| C9C  | C10C | C11C | 63.39(9)   | C25C | C24C | C23C | 120.01(13) |
| C9C  | C10C | C21C | 124.33(12) | C24C | C25C | C26C | 119.49(14) |
| C21C | C10C | C11C | 124.96(12) | C25C | C26C | C21C | 120.90(14) |
| C10C | C11C | C9C  | 57.94(9)   |      |      |      |            |

**Table 6 Hydrogen Atom Coordinates ( $\text{\AA}\times 10^4$ ) and Isotropic Displacement Parameters ( $\text{\AA}^2\times 10^3$ ) for 3P.**

| Atom | <i>x</i> | <i>y</i> | <i>z</i> | U(eq) |
|------|----------|----------|----------|-------|
| H3C  | 10504.24 | 5937.64  | 7043.71  | 31    |
| H4C  | 10445.46 | 7983.06  | 7459.55  | 37    |
| H5C  | 9084.64  | 9310.56  | 6552.48  | 38    |
| H6C  | 7671.36  | 8615.72  | 5246.69  | 32    |
| H10C | 8291.62  | 3414.81  | 3982.73  | 22    |
| H14C | 4501.93  | 1765.47  | 5307.24  | 38    |
| H15C | 4173.96  | 198.09   | 6147.08  | 42    |
| H17C | 7493.79  | -464.12  | 7288.3   | 43    |

|      |         |         |         |    |
|------|---------|---------|---------|----|
| H18C | 7835.29 | 1133.96 | 6475.89 | 43 |
| H20A | 4209.43 | 4575.61 | 3545.63 | 41 |
| H20B | 5030.97 | 4792.27 | 3053.09 | 41 |
| H20C | 5076.39 | 5668.09 | 3834.25 | 41 |
| H22C | 8154.75 | 5902.59 | 3010.58 | 25 |
| H23C | 7509.64 | 6336.85 | 1497.3  | 28 |
| H24C | 6130.99 | 5119.75 | 477.19  | 30 |
| H25C | 5423.74 | 3421.16 | 962.04  | 31 |
| H26C | 6081.92 | 2971.71 | 2473.33 | 27 |

**References:**

1. Dolomanov, O.V., Bourhis, L.J., Gildea, R.J, Howard, J.A.K. & Puschmann, H. (2009), *J. Appl. Cryst.* 42, 339-341.
2. Sheldrick, G.M. (2015). *Acta Cryst.* A71, 3-8.
3. Sheldrick, G.M. (2015). *Acta Cryst.* C71, 3-8



## Computational Data

All the DFT calculations were performed using the Gaussian 09 package.<sup>1</sup> All transition states and intermediates are confirmed by analyzing vibrational 1 frequencies. Free energies were computed at 298.15 K (room temperature). Both Route 1 and Route 2 were investigated using the B3LYP/6-311G(d,p) level of theory.<sup>2</sup> For Route 1, the transformation of **B'** to **3** was studied whereas for Route 2 the conversion of **C** to **3** was considered.

The free energy profile for the initial step for Route 1 for the conversion of **B** to **3**.

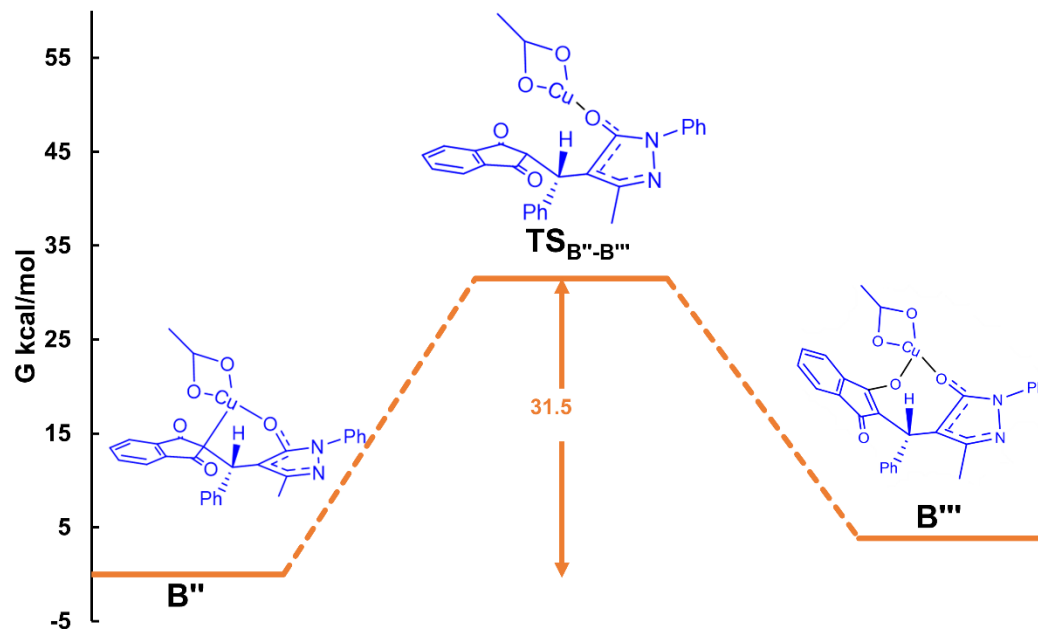

**Figure 4:** Free energy profiles (in kcal/mol) for the initial step of route 1 (the conversion of **B''** (the stationary point corresponding to **B**) into **B'''**).

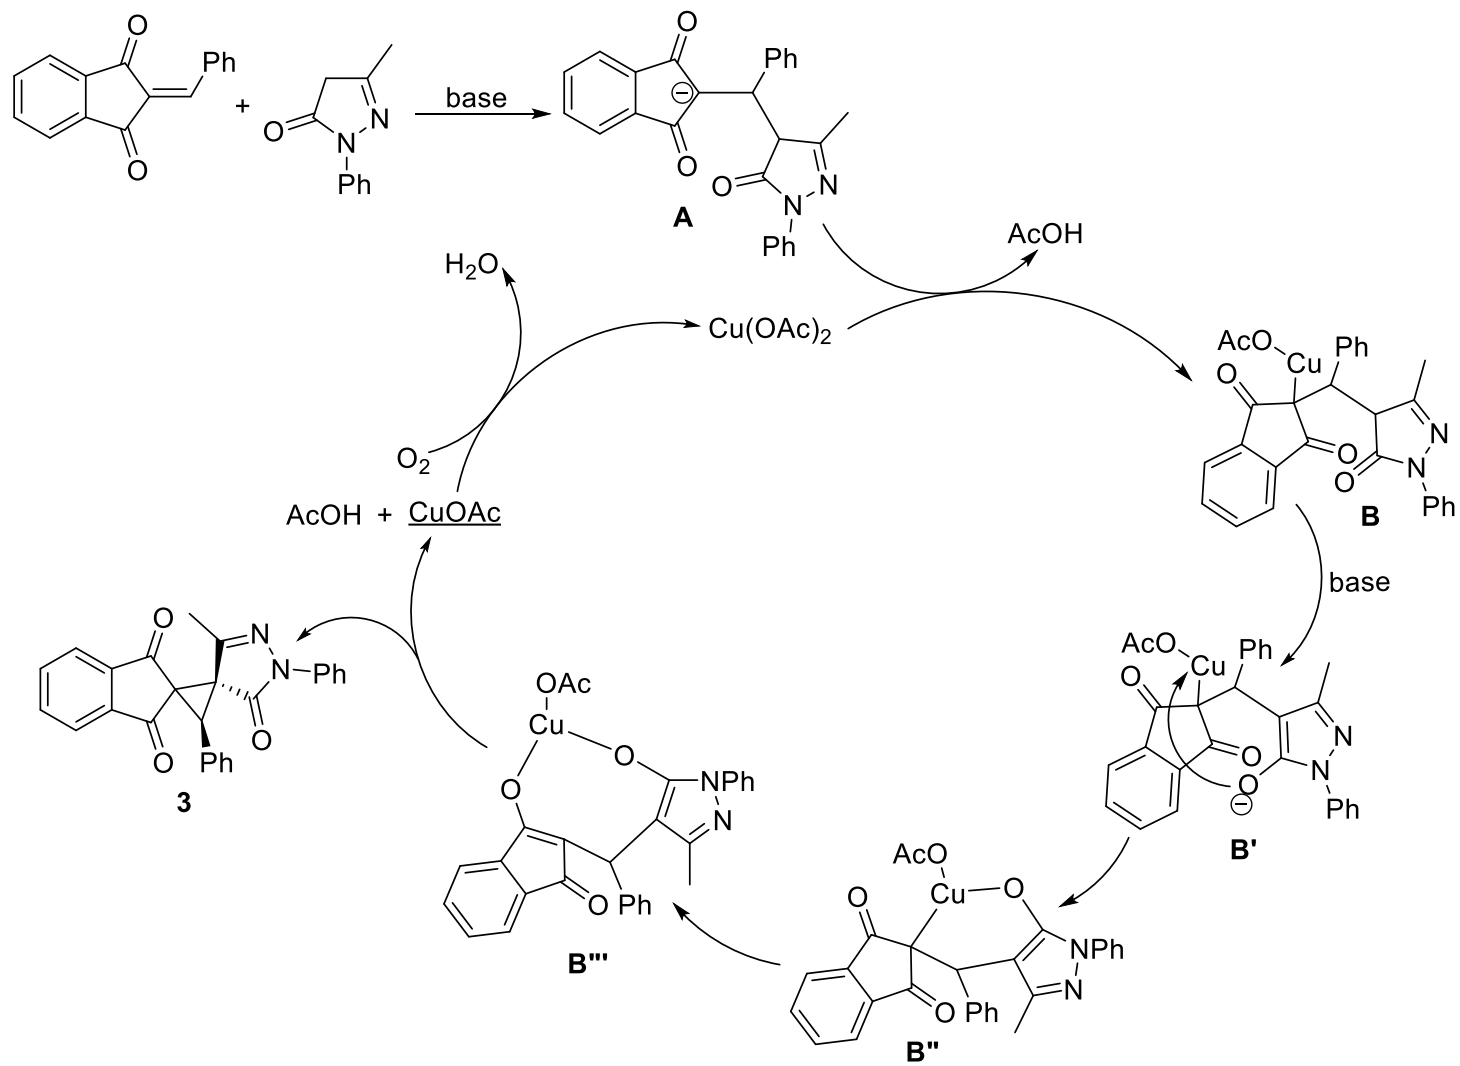

**Figure 5:** Plausible mechanism via route 1.

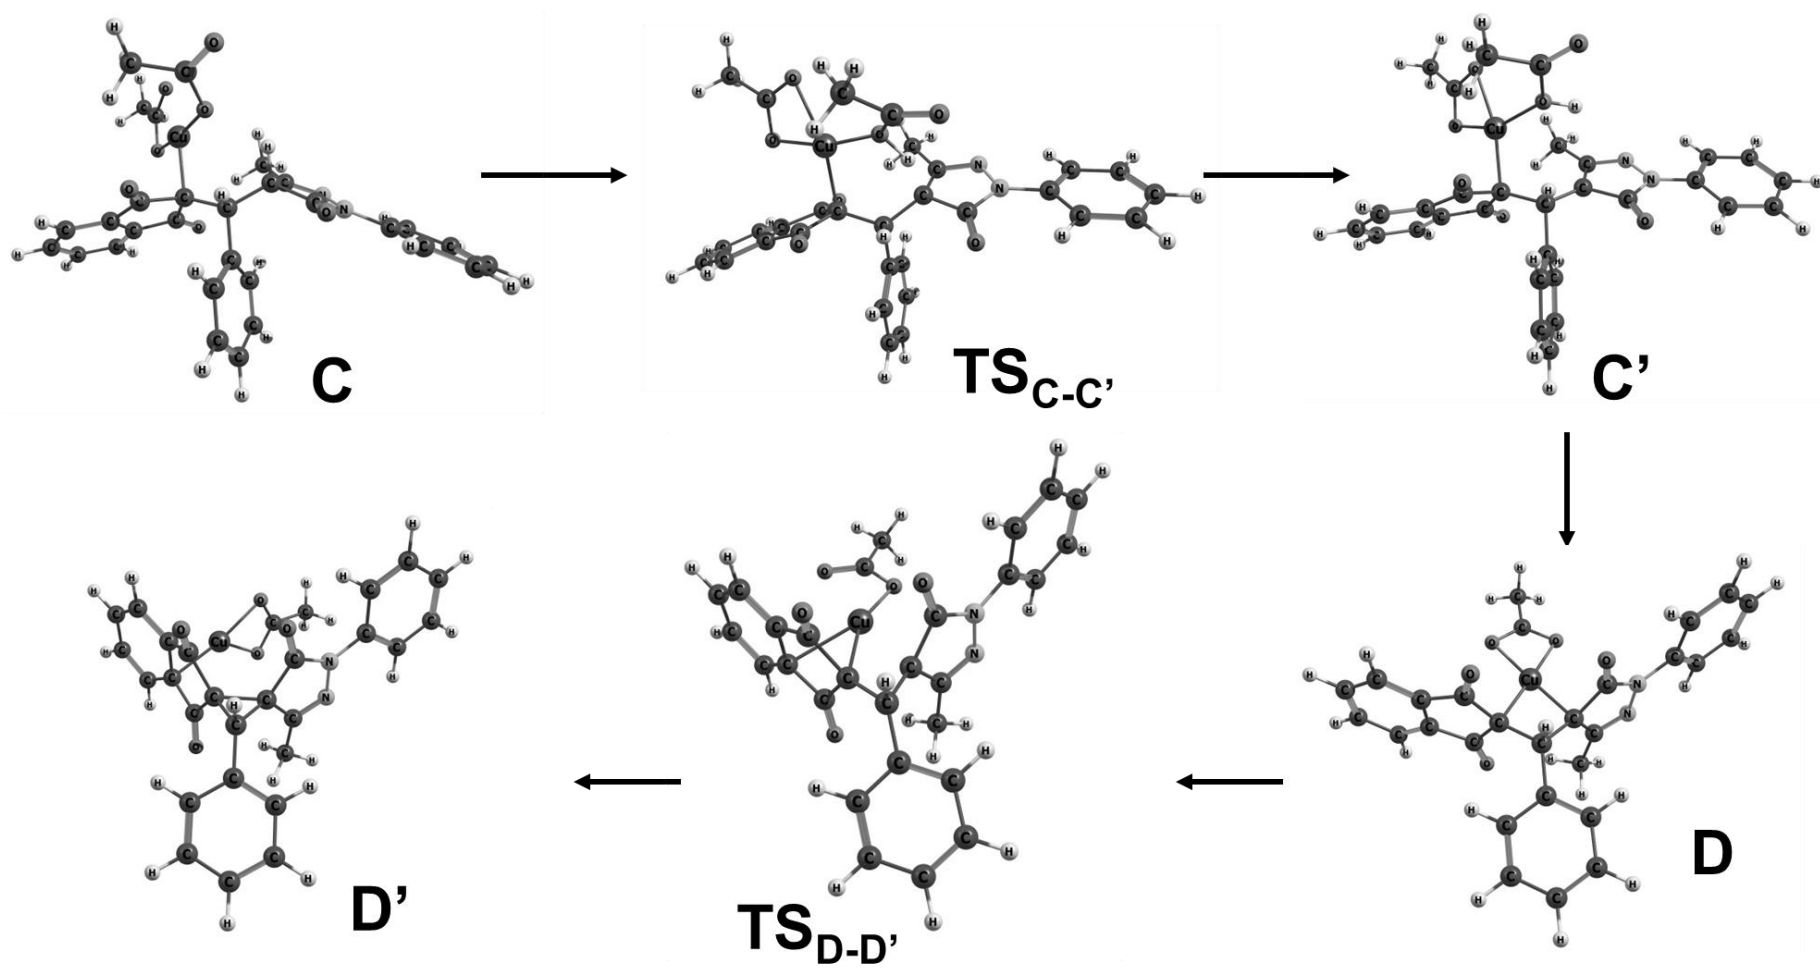

**Figure 6:** Graphical snapshots for the conversion of C→3 through Route 2 for major stereoisomer.

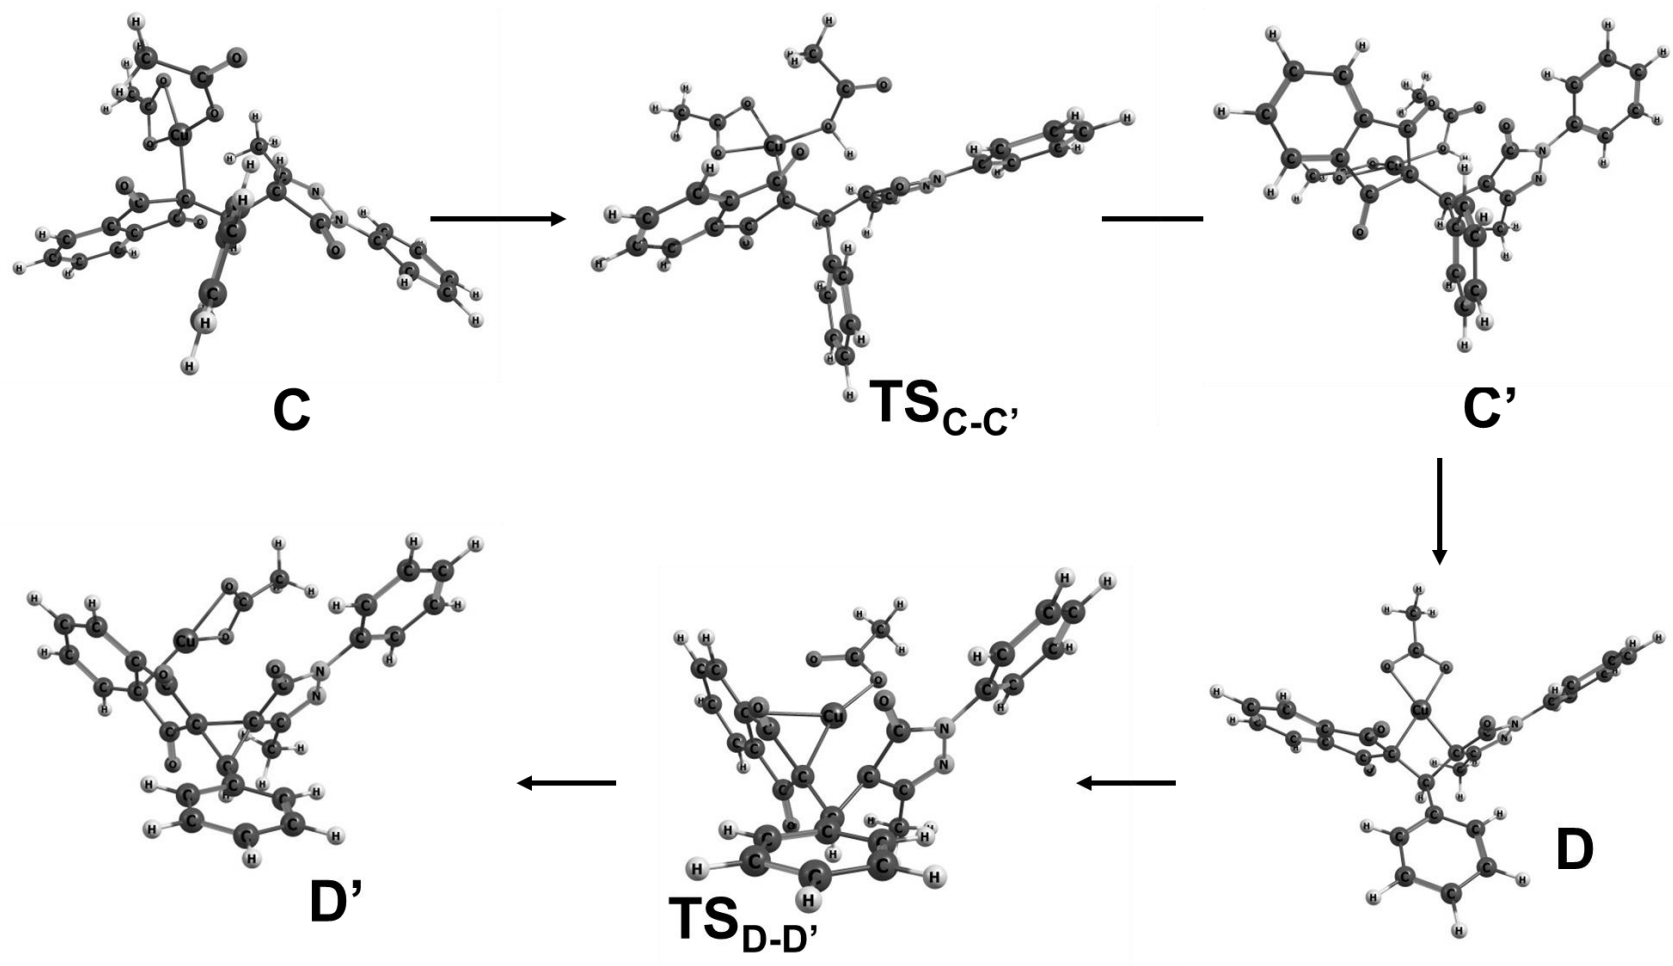

**Figure 7:** Graphical snapshots for the conversion of C→3 through Route 2 for minor stereoisomer.

**Table:** Cartesian coordinates of optimized geometries of the intermediates and transition states:

**(i) C (Major Stereoisomer)**

|   |              |              |              |
|---|--------------|--------------|--------------|
| 8 | -1.498410000 | -0.027256000 | -1.738183000 |
| 7 | 3.375832000  | -0.882102000 | -0.491520000 |
| 8 | -1.748737000 | 1.119047000  | 2.859419000  |
| 7 | 2.872875000  | -0.215189000 | -1.612521000 |
| 8 | 2.928864000  | -0.903332000 | 1.802912000  |
| 6 | 4.468413000  | -1.770401000 | -0.657695000 |
| 6 | 1.867610000  | 0.504304000  | -1.261208000 |
| 6 | -2.024016000 | 0.915735000  | 1.696785000  |
| 6 | 1.246417000  | 1.448690000  | -2.238188000 |
| 6 | -4.612402000 | 0.783343000  | 1.793965000  |
| 6 | 4.994618000  | -1.977883000 | -1.939248000 |
| 1 | 4.561293000  | -1.453512000 | -2.778105000 |
| 6 | -1.883518000 | 0.334057000  | -0.651188000 |
| 6 | -3.301525000 | 0.370469000  | -0.209308000 |
| 6 | -0.048326000 | -1.442297000 | 0.888793000  |
| 6 | -0.441204000 | -2.056899000 | 2.084858000  |
| 6 | 1.615042000  | 0.449544000  | 0.223104000  |

|   |              |              |              |
|---|--------------|--------------|--------------|
| 6 | 2.708184000  | -0.524495000 | 0.673805000  |
| 6 | -1.026068000 | 0.792246000  | 0.540078000  |
| 6 | 6.064402000  | -2.848409000 | -2.114788000 |
| 1 | 6.463337000  | -2.999386000 | -3.111867000 |
| 6 | -3.384604000 | 0.711912000  | 1.141156000  |
| 6 | -4.441793000 | 0.087810000  | -0.954092000 |
| 6 | 0.059309000  | -2.224452000 | -0.267350000 |
| 6 | 5.023259000  | -2.441467000 | 0.440650000  |
| 1 | 4.617621000  | -2.279771000 | 1.427229000  |
| 6 | -0.204392000 | -3.589878000 | -0.221611000 |
| 6 | -0.713779000 | -3.421024000 | 2.127122000  |
| 6 | 6.622144000  | -3.519787000 | -1.029056000 |
| 1 | 7.456844000  | -4.196349000 | -1.171650000 |
| 6 | -0.595830000 | -4.192040000 | 0.973349000  |
| 6 | -5.756930000 | 0.508633000  | 1.051140000  |
| 6 | -5.672226000 | 0.164748000  | -0.308161000 |
| 6 | 6.093664000  | -3.308664000 | 0.241698000  |
| 1 | 6.516345000  | -3.822360000 | 1.098055000  |
| 6 | 0.267722000  | 0.059544000  | 0.906586000  |
| 1 | 1.726947000  | 1.330543000  | -3.209967000 |

|    |              |              |              |
|----|--------------|--------------|--------------|
| 1  | 1.401102000  | 2.482293000  | -1.905339000 |
| 1  | 0.176923000  | 1.270724000  | -2.349438000 |
| 1  | -4.662494000 | 1.039069000  | 2.845499000  |
| 1  | -0.509550000 | -1.464655000 | 2.990008000  |
| 1  | -4.359765000 | -0.181874000 | -1.999794000 |
| 1  | 0.346637000  | -1.769455000 | -1.206403000 |
| 1  | -0.101691000 | -4.184481000 | -1.122160000 |
| 1  | -1.003572000 | -3.882048000 | 3.064519000  |
| 1  | -0.801857000 | -5.255981000 | 1.004765000  |
| 1  | -6.730302000 | 0.554308000  | 1.525934000  |
| 1  | -6.582417000 | -0.047197000 | -0.857461000 |
| 1  | 0.446053000  | 0.325852000  | 1.949505000  |
| 29 | -0.786748000 | 2.769199000  | 0.159021000  |
| 8  | -0.966758000 | 4.698159000  | -0.552363000 |
| 6  | -1.822130000 | 4.229516000  | -1.348236000 |
| 8  | -2.069376000 | 2.969395000  | -1.255850000 |
| 6  | -2.522418000 | 5.055647000  | -2.376424000 |
| 1  | -2.315327000 | 6.112310000  | -2.216848000 |
| 1  | -2.171183000 | 4.759968000  | -3.368386000 |
| 1  | -3.596089000 | 4.864047000  | -2.336711000 |

|   |              |             |             |
|---|--------------|-------------|-------------|
| 8 | 0.532280000  | 2.899126000 | 1.399584000 |
| 6 | 0.532979000  | 3.716056000 | 2.461243000 |
| 8 | 1.565404000  | 3.880406000 | 3.064058000 |
| 6 | -0.776858000 | 4.373663000 | 2.829833000 |
| 1 | -1.136870000 | 4.988494000 | 2.000959000 |
| 1 | -1.522114000 | 3.606873000 | 3.055307000 |
| 1 | -0.634246000 | 5.001564000 | 3.707756000 |
| 1 | 1.864564000  | 1.434422000 | 0.635628000 |

**(ii) TS<sub>C-C'</sub> (Major stereoisomer)**

|   |              |              |              |
|---|--------------|--------------|--------------|
| 8 | -2.052897000 | -0.126867000 | -1.910953000 |
| 7 | 3.416393000  | -0.845331000 | -0.417591000 |
| 8 | -1.705037000 | 1.117201000  | 2.657091000  |
| 7 | 2.943102000  | -0.453322000 | -1.627052000 |
| 8 | 2.538748000  | -1.025791000 | 1.767198000  |
| 6 | 4.718792000  | -1.372609000 | -0.308986000 |
| 6 | 1.685641000  | -0.059053000 | -1.473886000 |
| 6 | -2.133381000 | 0.865316000  | 1.545993000  |
| 6 | 0.979634000  | 0.512839000  | -2.659247000 |
| 6 | -4.700340000 | 1.004646000  | 1.907365000  |



|   |              |              |              |
|---|--------------|--------------|--------------|
| 6 | 5.468878000  | -1.586089000 | -1.476616000 |
| 1 | 5.029830000  | -1.341283000 | -2.432727000 |
| 6 | -2.283661000 | 0.234917000  | -0.775161000 |
| 6 | -3.644698000 | 0.417138000  | -0.199240000 |
| 6 | -0.508280000 | -1.758523000 | 0.648004000  |
| 6 | -0.851915000 | -2.329875000 | 1.877279000  |
| 6 | 1.280557000  | -0.088157000 | -0.097088000 |
| 6 | 2.423381000  | -0.703047000 | 0.599771000  |
| 6 | -1.290994000 | 0.558161000  | 0.323842000  |
| 6 | 6.754135000  | -2.100353000 | -1.384817000 |
| 1 | 7.326312000  | -2.261608000 | -2.291508000 |
| 6 | -3.558921000 | 0.786914000  | 1.143805000  |
| 6 | -4.875033000 | 0.247249000  | -0.822677000 |
| 6 | -0.561394000 | -2.544539000 | -0.506134000 |
| 6 | 5.272333000  | -1.677757000 | 0.944824000  |
| 1 | 4.692462000  | -1.511445000 | 1.839175000  |
| 6 | -0.942371000 | -3.880615000 | -0.428581000 |
| 6 | -1.233404000 | -3.667816000 | 1.952537000  |
| 6 | 7.309381000  | -2.410416000 | -0.142692000 |
| 1 | 8.313698000  | -2.812647000 | -0.077668000 |

|    |              |              |              |
|----|--------------|--------------|--------------|
| 6  | -1.281565000 | -4.446712000 | 0.800033000  |
| 6  | -5.936391000 | 0.837139000  | 1.287134000  |
| 6  | -6.022415000 | 0.462327000  | -0.062585000 |
| 6  | 6.560837000  | -2.195141000 | 1.012587000  |
| 1  | 6.982202000  | -2.428203000 | 1.983837000  |
| 6  | -0.054601000 | -0.278364000 | 0.620982000  |
| 1  | 1.533886000  | 0.264351000  | -3.564554000 |
| 1  | 0.940232000  | 1.606685000  | -2.585254000 |
| 1  | -0.046445000 | 0.152912000  | -2.734119000 |
| 1  | -4.619681000 | 1.289159000  | 2.949634000  |
| 1  | -0.801183000 | -1.730252000 | 2.778848000  |
| 1  | -4.925887000 | -0.043781000 | -1.864785000 |
| 1  | -0.302554000 | -2.116862000 | -1.466215000 |
| 1  | -0.970215000 | -4.481864000 | -1.330431000 |
| 1  | -1.483789000 | -4.100160000 | 2.914777000  |
| 1  | -1.576593000 | -5.488389000 | 0.856850000  |
| 1  | -6.847989000 | 0.994019000  | 1.852481000  |
| 1  | -6.999301000 | 0.337619000  | -0.515905000 |
| 1  | 0.186743000  | -0.037889000 | 1.660532000  |
| 29 | -0.786317000 | 2.533567000  | -0.075509000 |

|   |              |             |              |
|---|--------------|-------------|--------------|
| 8 | -0.895075000 | 4.598910000 | -0.684203000 |
| 6 | -2.092697000 | 4.331211000 | -0.936841000 |
| 8 | -2.508148000 | 3.133264000 | -0.704389000 |
| 6 | -3.054352000 | 5.332595000 | -1.500498000 |
| 1 | -2.572504000 | 6.303236000 | -1.603155000 |
| 1 | -3.405577000 | 4.986759000 | -2.475403000 |
| 1 | -3.926373000 | 5.411345000 | -0.847897000 |
| 8 | 1.037475000  | 2.412695000 | 0.419499000  |
| 6 | 1.816977000  | 3.080378000 | 1.329720000  |
| 8 | 2.938083000  | 2.718770000 | 1.541758000  |
| 6 | 1.112258000  | 4.243001000 | 1.975402000  |
| 1 | 0.692086000  | 4.902020000 | 1.213609000  |
| 1 | 0.285559000  | 3.863610000 | 2.583410000  |
| 1 | 1.809682000  | 4.784522000 | 2.610885000  |
| 1 | 1.393839000  | 1.309357000 | 0.188713000  |

**(iii) C' (Major stereoisomer)**

|   |              |              |              |
|---|--------------|--------------|--------------|
| 8 | -1.776122000 | -0.556441000 | -1.854118000 |
| 7 | 3.393524000  | -0.952302000 | -0.677026000 |
| 8 | -1.794432000 | 1.143158000  | 2.561242000  |

|   |              |              |              |
|---|--------------|--------------|--------------|
| 7 | 2.916711000  | -0.163155000 | -1.627289000 |
| 8 | 2.584627000  | -1.768487000 | 1.396556000  |
| 6 | 4.705218000  | -1.480382000 | -0.764213000 |
| 6 | 1.638877000  | 0.188606000  | -1.301973000 |
| 6 | -2.128520000 | 0.827322000  | 1.424528000  |
| 6 | 0.936671000  | 1.103394000  | -2.258256000 |
| 6 | -4.714934000 | 1.116481000  | 1.531113000  |
| 6 | 5.540868000  | -1.048345000 | -1.804453000 |
| 1 | 5.166542000  | -0.324962000 | -2.514421000 |
| 6 | -2.101081000 | -0.017478000 | -0.811570000 |
| 6 | -3.507228000 | 0.285553000  | -0.403564000 |
| 6 | -0.455230000 | -1.814675000 | 1.096089000  |
| 6 | -0.735213000 | -2.134878000 | 2.425795000  |
| 6 | 1.242165000  | -0.388977000 | -0.102135000 |
| 6 | 2.403792000  | -1.148996000 | 0.368513000  |
| 6 | -1.218297000 | 0.416031000  | 0.315504000  |
| 6 | 6.828383000  | -1.555321000 | -1.906570000 |
| 1 | 7.468951000  | -1.215937000 | -2.712509000 |
| 6 | -3.523612000 | 0.778292000  | 0.902805000  |
| 6 | -4.681562000 | 0.111838000  | -1.121643000 |

|   |              |              |              |
|---|--------------|--------------|--------------|
| 6 | -0.619813000 | -2.790908000 | 0.109571000  |
| 6 | 5.168297000  | -2.421358000 | 0.165817000  |
| 1 | 4.524440000  | -2.752295000 | 0.965605000  |
| 6 | -1.056292000 | -4.067479000 | 0.453897000  |
| 6 | -1.174087000 | -3.412647000 | 2.766139000  |
| 6 | 7.299514000  | -2.489726000 | -0.983567000 |
| 1 | 8.306512000  | -2.881123000 | -1.067830000 |
| 6 | -1.335297000 | -4.383664000 | 1.782043000  |
| 6 | -5.899624000 | 0.944899000  | 0.813910000  |
| 6 | -5.882645000 | 0.448958000  | -0.496207000 |
| 6 | 6.463653000  | -2.914772000 | 0.045622000  |
| 1 | 6.816725000  | -3.642108000 | 0.767515000  |
| 6 | 0.007076000  | -0.370645000 | 0.743683000  |
| 1 | 1.517361000  | 1.162770000  | -3.179439000 |
| 1 | 0.860764000  | 2.125620000  | -1.869292000 |
| 1 | -0.063541000 | 0.738268000  | -2.488989000 |
| 1 | -4.715121000 | 1.490748000  | 2.548076000  |
| 1 | -0.610005000 | -1.383410000 | 3.196253000  |
| 1 | -4.654359000 | -0.274048000 | -2.133536000 |
| 1 | -0.417094000 | -2.551798000 | -0.926659000 |

|    |              |              |              |
|----|--------------|--------------|--------------|
| 1  | -1.175093000 | -4.817227000 | -0.320564000 |
| 1  | -1.382836000 | -3.647515000 | 3.803981000  |
| 1  | -1.671492000 | -5.379779000 | 2.047070000  |
| 1  | -6.848769000 | 1.193321000  | 1.275317000  |
| 1  | -6.819176000 | 0.324509000  | -1.028176000 |
| 1  | 0.297459000  | 0.060216000  | 1.710100000  |
| 29 | -0.716565000 | 2.356257000  | -0.098347000 |
| 8  | -0.689884000 | 4.400484000  | -0.567001000 |
| 6  | -1.682799000 | 4.186816000  | -1.324093000 |
| 8  | -2.134517000 | 3.002678000  | -1.424321000 |
| 6  | -2.343545000 | 5.308553000  | -2.075144000 |
| 1  | -1.636046000 | 6.119674000  | -2.243834000 |
| 1  | -2.750410000 | 4.946245000  | -3.018968000 |
| 1  | -3.173213000 | 5.691736000  | -1.474030000 |
| 8  | 1.022437000  | 2.513315000  | 1.054599000  |
| 6  | 1.304220000  | 3.383828000  | 2.115973000  |
| 8  | 2.424470000  | 3.475710000  | 2.513760000  |
| 6  | 0.070798000  | 4.076599000  | 2.595416000  |
| 1  | -0.341244000 | 4.680338000  | 1.782991000  |
| 1  | -0.674473000 | 3.330253000  | 2.883427000  |

|   |             |             |             |
|---|-------------|-------------|-------------|
| 1 | 0.324784000 | 4.705867000 | 3.445084000 |
| 1 | 1.842988000 | 2.056575000 | 0.809953000 |

**(iv) D (Major stereoisomer)**

|   |              |              |              |
|---|--------------|--------------|--------------|
| 8 | -2.443238000 | -0.469428000 | -1.869498000 |
| 7 | 2.878343000  | -0.327000000 | -0.079959000 |
| 8 | -1.795490000 | 0.534564000  | 2.725353000  |
| 7 | 2.482108000  | -0.703585000 | -1.353081000 |
| 8 | 1.840882000  | -0.140695000 | 2.016624000  |
| 6 | 4.240518000  | 0.004314000  | 0.150979000  |
| 6 | 1.204302000  | -0.938841000 | -1.362083000 |
| 6 | -2.207852000 | 0.537141000  | 1.587059000  |
| 6 | 0.536737000  | -1.411047000 | -2.612220000 |
| 6 | -4.421517000 | 1.880709000  | 1.806013000  |
| 6 | 5.144554000  | -0.043738000 | -0.916441000 |
| 1 | 4.790095000  | -0.327509000 | -1.896365000 |
| 6 | -2.539334000 | -0.009506000 | -0.748902000 |
| 6 | -3.677763000 | 0.810878000  | -0.243073000 |
| 6 | -1.012975000 | -2.707913000 | 0.283395000  |
| 6 | -0.033530000 | -3.684351000 | 0.074485000  |

|   |              |              |              |
|---|--------------|--------------|--------------|
| 6 | 0.622202000  | -0.688465000 | -0.036912000 |
| 6 | 1.818864000  | -0.337548000 | 0.816766000  |
| 6 | -1.562859000 | -0.130670000 | 0.393955000  |
| 6 | 6.480523000  | 0.275968000  | -0.702753000 |
| 1 | 7.172350000  | 0.235808000  | -1.536734000 |
| 6 | -3.483978000 | 1.134524000  | 1.101845000  |
| 6 | -4.814888000 | 1.226110000  | -0.927149000 |
| 6 | -2.354228000 | -3.094533000 | 0.270244000  |
| 6 | 4.682696000  | 0.373655000  | 1.427181000  |
| 1 | 3.985198000  | 0.406484000  | 2.249777000  |
| 6 | -2.710797000 | -4.422394000 | 0.046484000  |
| 6 | -0.387045000 | -5.011679000 | -0.151784000 |
| 6 | 6.930821000  | 0.645546000  | 0.562795000  |
| 1 | 7.973433000  | 0.894372000  | 0.723104000  |
| 6 | -1.729102000 | -5.385591000 | -0.169074000 |
| 6 | -5.560789000 | 2.302752000  | 1.123527000  |
| 6 | -5.755412000 | 1.978958000  | -0.227215000 |
| 6 | 6.024538000  | 0.691495000  | 1.618468000  |
| 1 | 6.358588000  | 0.976632000  | 2.609797000  |
| 6 | -0.601826000 | -1.290374000 | 0.630311000  |



|    |              |              |              |
|----|--------------|--------------|--------------|
| 1  | 1.254811000  | -1.374383000 | -3.431531000 |
| 1  | -0.340009000 | -0.809533000 | -2.852500000 |
| 1  | 0.181287000  | -2.437919000 | -2.492789000 |
| 1  | -4.260582000 | 2.120931000  | 2.850078000  |
| 1  | 1.016159000  | -3.410631000 | 0.095736000  |
| 1  | -4.954137000 | 0.965702000  | -1.969540000 |
| 1  | -3.133957000 | -2.361287000 | 0.441157000  |
| 1  | -3.758334000 | -4.701699000 | 0.038004000  |
| 1  | 0.387347000  | -5.753413000 | -0.311887000 |
| 1  | -2.006289000 | -6.418318000 | -0.346772000 |
| 1  | -6.310958000 | 2.889668000  | 1.641182000  |
| 1  | -6.653031000 | 2.320380000  | -0.730074000 |
| 1  | -0.383794000 | -1.251179000 | 1.706758000  |
| 29 | -0.163035000 | 1.126417000  | -0.205891000 |
| 8  | 1.182292000  | 2.443377000  | -0.839655000 |
| 6  | 0.279831000  | 3.337369000  | -0.776109000 |
| 8  | -0.883351000 | 2.976373000  | -0.405681000 |
| 6  | 0.584139000  | 4.767100000  | -1.097681000 |
| 1  | 1.369041000  | 4.823838000  | -1.851340000 |
| 1  | -0.316581000 | 5.280219000  | -1.432518000 |

1 0.946476000 5.259263000 -0.190601000

**(v) TS<sub>D-D'</sub> (Major stereoisomer)**

8 -2.654435000 -1.126822000 -1.504332000

7 2.315202000 -0.278649000 0.093221000

8 -1.571411000 -0.127647000 2.958511000

7 1.962477000 -0.718978000 -1.175086000

8 1.299562000 -0.191288000 2.199081000

6 3.600936000 0.297114000 0.286055000

6 0.745367000 -1.144015000 -1.179442000

6 -1.833334000 0.058201000 1.798522000

6 0.157679000 -1.686096000 -2.442077000

6 -3.179540000 2.284088000 1.826604000

6 4.425762000 0.503198000 -0.824982000

1 4.066156000 0.234522000 -1.806988000

6 -2.417622000 -0.497545000 -0.497834000

6 -3.018593000 0.809795000 -0.109434000

6 -1.014367000 -3.441708000 0.286865000

6 0.034201000 -4.326156000 0.012004000

6 0.171997000 -1.065768000 0.198358000

|   |              |              |              |
|---|--------------|--------------|--------------|
| 6 | 1.293749000  | -0.432142000 | 1.010631000  |
| 6 | -1.438841000 | -0.837761000 | 0.618062000  |
| 6 | 5.689146000  | 1.055793000  | -0.650770000 |
| 1 | 6.320219000  | 1.213706000  | -1.518169000 |
| 6 | -2.672877000 | 1.139836000  | 1.215835000  |
| 6 | -3.878184000 | 1.620401000  | -0.849834000 |
| 6 | -2.329882000 | -3.870631000 | 0.103400000  |
| 6 | 4.046411000  | 0.646869000  | 1.566193000  |
| 1 | 3.406593000  | 0.491659000  | 2.420873000  |
| 6 | -2.592762000 | -5.158222000 | -0.358296000 |
| 6 | -0.228501000 | -5.611885000 | -0.450930000 |
| 6 | 6.142703000  | 1.408800000  | 0.618433000  |
| 1 | 7.128262000  | 1.840775000  | 0.747893000  |
| 6 | -1.544566000 | -6.030772000 | -0.638703000 |
| 6 | -4.004809000 | 3.108077000  | 1.071333000  |
| 6 | -4.350530000 | 2.780007000  | -0.249063000 |
| 6 | 5.314240000  | 1.201975000  | 1.717678000  |
| 1 | 5.651942000  | 1.472422000  | 2.711813000  |
| 6 | -0.700913000 | -2.097816000 | 0.876951000  |
| 1 | 0.958642000  | -1.772168000 | -3.176459000 |

|    |              |              |              |
|----|--------------|--------------|--------------|
| 1  | -0.617243000 | -1.028545000 | -2.839005000 |
| 1  | -0.304872000 | -2.660742000 | -2.284279000 |
| 1  | -2.915511000 | 2.521437000  | 2.849461000  |
| 1  | 1.060208000  | -4.006372000 | 0.160687000  |
| 1  | -4.147539000 | 1.350192000  | -1.863176000 |
| 1  | -3.152637000 | -3.199440000 | 0.314836000  |
| 1  | -3.618882000 | -5.477051000 | -0.501100000 |
| 1  | 0.593664000  | -6.285756000 | -0.662971000 |
| 1  | -1.751004000 | -7.031745000 | -0.999829000 |
| 1  | -4.387959000 | 4.024098000  | 1.504676000  |
| 1  | -4.995075000 | 3.448248000  | -0.807302000 |
| 1  | -0.447007000 | -2.135776000 | 1.939358000  |
| 29 | -0.652647000 | 1.159715000  | -0.153643000 |
| 8  | 0.628126000  | 2.353056000  | -0.882835000 |
| 6  | 0.032088000  | 3.505453000  | -0.914514000 |
| 8  | -1.133974000 | 3.671764000  | -0.542779000 |
| 6  | 0.875190000  | 4.647721000  | -1.443942000 |
| 1  | 1.211213000  | 4.417237000  | -2.457548000 |
| 1  | 0.305634000  | 5.575493000  | -1.442226000 |
| 1  | 1.769605000  | 4.757164000  | -0.826521000 |

**(vi) D' (Major stereoisomer)**

|   |              |              |              |
|---|--------------|--------------|--------------|
| 8 | -2.615325000 | -1.183370000 | -1.450189000 |
| 7 | 2.259066000  | -0.100662000 | 0.139936000  |
| 8 | -1.487532000 | -0.081343000 | 2.937863000  |
| 7 | 1.919358000  | -0.508292000 | -1.148635000 |
| 8 | 1.321243000  | -0.275963000 | 2.270031000  |
| 6 | 3.525406000  | 0.503292000  | 0.355279000  |
| 6 | 0.750216000  | -1.049196000 | -1.146324000 |
| 6 | -1.696269000 | 0.098967000  | 1.768154000  |
| 6 | 0.174431000  | -1.549005000 | -2.432016000 |
| 6 | -3.256921000 | 2.187289000  | 1.879267000  |
| 6 | 4.459121000  | 0.522164000  | -0.688167000 |
| 1 | 4.200597000  | 0.075226000  | -1.637043000 |
| 6 | -2.317367000 | -0.508222000 | -0.495184000 |
| 6 | -2.916415000 | 0.820758000  | -0.146856000 |
| 6 | -1.000873000 | -3.462060000 | 0.273386000  |
| 6 | 0.028578000  | -4.317092000 | -0.133426000 |
| 6 | 0.189017000  | -1.073156000 | 0.238651000  |
| 6 | 1.285568000  | -0.424887000 | 1.068969000  |
| 6 | -1.322219000 | -0.830385000 | 0.611120000  |

|   |              |              |              |
|---|--------------|--------------|--------------|
| 6 | 5.700966000  | 1.116966000  | -0.491785000 |
| 1 | 6.416659000  | 1.126131000  | -1.306335000 |
| 6 | -2.520342000 | 1.201273000  | 1.174721000  |
| 6 | -4.040636000 | 1.431935000  | -0.759116000 |
| 6 | -2.322200000 | -3.907139000 | 0.192295000  |
| 6 | 3.844357000  | 1.080157000  | 1.590852000  |
| 1 | 3.124483000  | 1.063182000  | 2.394138000  |
| 6 | -2.610143000 | -5.178008000 | -0.298066000 |
| 6 | -0.258979000 | -5.587368000 | -0.625083000 |
| 6 | 6.028349000  | 1.691241000  | 0.734367000  |
| 1 | 6.998292000  | 2.151427000  | 0.882941000  |
| 6 | -1.580500000 | -6.020638000 | -0.710003000 |
| 6 | -4.306222000 | 2.806651000  | 1.238883000  |
| 6 | -4.697488000 | 2.429298000  | -0.074921000 |
| 6 | 5.093962000  | 1.667086000  | 1.766597000  |
| 1 | 5.332521000  | 2.112258000  | 2.725952000  |
| 6 | -0.663924000 | -2.140247000 | 0.895044000  |
| 1 | 0.982686000  | -1.627815000 | -3.159546000 |
| 1 | -0.573963000 | -0.856010000 | -2.821287000 |
| 1 | -0.312998000 | -2.515539000 | -2.308631000 |

|    |              |              |              |
|----|--------------|--------------|--------------|
| 1  | -2.991562000 | 2.420935000  | 2.903025000  |
| 1  | 1.059440000  | -3.986487000 | -0.064473000 |
| 1  | -4.365520000 | 1.095105000  | -1.735864000 |
| 1  | -3.129685000 | -3.258146000 | 0.508526000  |
| 1  | -3.640850000 | -5.507947000 | -0.360834000 |
| 1  | 0.549117000  | -6.237965000 | -0.939625000 |
| 1  | -1.806006000 | -7.009141000 | -1.093539000 |
| 1  | -4.873276000 | 3.572672000  | 1.754796000  |
| 1  | -5.552397000 | 2.917622000  | -0.527894000 |
| 1  | -0.418496000 | -2.195501000 | 1.957631000  |
| 29 | -1.253222000 | 1.961889000  | -0.219367000 |
| 8  | -0.279211000 | 2.495065000  | -1.922257000 |
| 6  | 0.546148000  | 3.118544000  | -1.184761000 |
| 8  | 0.374274000  | 3.120867000  | 0.074443000  |
| 6  | 1.731548000  | 3.818625000  | -1.787218000 |
| 1  | 1.534212000  | 4.079193000  | -2.826172000 |
| 1  | 1.984398000  | 4.703948000  | -1.204260000 |
| 1  | 2.587990000  | 3.139140000  | -1.754729000 |

**(vii) C (Minor Stereoisomer)**

|   |              |              |              |
|---|--------------|--------------|--------------|
| 8 | -1.136931000 | -0.138892000 | -1.373314000 |
| 7 | 3.369476000  | -0.692665000 | -0.415694000 |
| 8 | -1.811377000 | 2.246227000  | 2.695194000  |
| 7 | 2.855037000  | 0.077295000  | -1.457440000 |
| 8 | 3.104823000  | -0.820526000 | 1.891496000  |
| 6 | 4.349774000  | -1.674351000 | -0.712482000 |
| 6 | 1.966303000  | 0.879065000  | -0.995572000 |
| 6 | -1.933214000 | 1.536321000  | 1.722725000  |
| 6 | 1.348337000  | 1.877705000  | -1.918897000 |
| 6 | -4.450769000 | 0.954748000  | 1.893057000  |
| 6 | 4.710726000  | -1.895397000 | -2.048159000 |
| 1 | 4.238374000  | -1.312424000 | -2.824870000 |
| 6 | -1.621623000 | 0.382745000  | -0.396370000 |
| 6 | -3.035886000 | 0.285624000  | 0.036438000  |
| 6 | 1.807699000  | 0.773015000  | 0.504994000  |
| 6 | 2.830222000  | -0.339213000 | 0.815495000  |
| 6 | -0.854468000 | 1.159838000  | 0.690887000  |
| 6 | 5.669439000  | -2.853621000 | -2.356465000 |
| 1 | 5.940323000  | -3.013517000 | -3.394293000 |
| 6 | -3.209541000 | 0.926741000  | 1.263035000  |



|    |              |              |              |
|----|--------------|--------------|--------------|
| 6  | -4.093786000 | -0.356482000 | -0.601009000 |
| 6  | 4.956702000  | -2.423021000 | 0.305437000  |
| 1  | 4.677963000  | -2.254196000 | 1.333658000  |
| 6  | 6.278017000  | -3.601942000 | -1.351233000 |
| 1  | 7.025152000  | -4.347577000 | -1.597372000 |
| 6  | -5.512143000 | 0.314633000  | 1.260156000  |
| 6  | -5.335843000 | -0.332823000 | 0.025730000  |
| 6  | 5.913685000  | -3.378022000 | -0.026386000 |
| 1  | 6.377824000  | -3.950681000 | 0.768945000  |
| 6  | 0.424025000  | 0.401411000  | 1.146047000  |
| 1  | 1.820862000  | 1.790006000  | -2.897769000 |
| 1  | 1.503596000  | 2.895741000  | -1.549375000 |
| 1  | 0.280774000  | 1.687242000  | -2.051074000 |
| 1  | -4.570708000 | 1.455935000  | 2.845854000  |
| 1  | -3.942040000 | -0.852360000 | -1.551947000 |
| 1  | -6.491990000 | 0.311665000  | 1.723764000  |
| 1  | -6.183540000 | -0.821387000 | -0.440943000 |
| 29 | -0.698793000 | 3.017508000  | -0.064289000 |
| 8  | -1.036280000 | 4.756747000  | -1.117680000 |
| 6  | -1.944612000 | 4.119439000  | -1.712807000 |

|   |              |              |              |
|---|--------------|--------------|--------------|
| 8 | -2.128149000 | 2.898506000  | -1.347719000 |
| 6 | -2.772830000 | 4.706341000  | -2.807836000 |
| 1 | -2.639744000 | 5.786178000  | -2.844284000 |
| 1 | -2.459053000 | 4.270477000  | -3.760211000 |
| 1 | -3.822871000 | 4.451007000  | -2.657570000 |
| 8 | 0.701039000  | 3.410710000  | 1.024055000  |
| 6 | 0.757623000  | 4.409331000  | 1.912018000  |
| 8 | 1.797513000  | 4.588403000  | 2.505343000  |
| 6 | -0.483566000 | 5.241608000  | 2.122547000  |
| 1 | -0.809641000 | 5.684976000  | 1.179063000  |
| 1 | -1.282507000 | 4.602962000  | 2.507483000  |
| 1 | -0.274100000 | 6.029194000  | 2.844366000  |
| 1 | 2.143684000  | 1.712354000  | 0.949941000  |
| 1 | 0.230409000  | -0.613802000 | 0.779510000  |
| 6 | 0.501645000  | 0.283049000  | 2.666615000  |
| 6 | -0.104901000 | -0.824588000 | 3.265898000  |
| 6 | 1.122814000  | 1.231947000  | 3.480499000  |
| 6 | -0.099250000 | -0.984118000 | 4.649735000  |
| 1 | -0.570654000 | -1.583674000 | 2.644440000  |
| 6 | 1.130804000  | 1.072945000  | 4.862048000  |

|   |              |              |             |
|---|--------------|--------------|-------------|
| 1 | 1.604105000  | 2.099495000  | 3.049638000 |
| 6 | 0.518920000  | -0.031763000 | 5.453241000 |
| 1 | -0.566090000 | -1.856138000 | 5.094081000 |
| 1 | 1.621183000  | 1.817505000  | 5.478810000 |
| 1 | 0.531832000  | -0.151223000 | 6.530821000 |

**(viii) TS<sub>C-C'</sub> (Minor stereoisomer)**

|   |              |              |              |
|---|--------------|--------------|--------------|
| 8 | -3.343138000 | -0.119792000 | -0.519008000 |
| 7 | 3.281015000  | -0.624226000 | -0.095802000 |
| 8 | -0.009754000 | 2.116613000  | 2.017868000  |
| 7 | 2.983199000  | -1.004733000 | -1.369561000 |
| 8 | 2.087038000  | 0.046152000  | 1.816313000  |
| 6 | 4.617151000  | -0.657853000 | 0.346615000  |
| 6 | 1.684260000  | -0.849135000 | -1.529958000 |
| 6 | -1.043972000 | 1.595860000  | 1.648976000  |
| 6 | 1.053930000  | -1.230507000 | -2.829878000 |
| 6 | -2.667297000 | 2.364467000  | 3.521283000  |
| 6 | 5.600716000  | -1.198477000 | -0.498056000 |
| 1 | 5.307602000  | -1.570955000 | -1.468577000 |
| 6 | -2.769486000 | 0.511814000  | 0.341094000  |

|   |              |              |              |
|---|--------------|--------------|--------------|
| 6 | -3.368217000 | 1.119921000  | 1.556675000  |
| 6 | 1.055943000  | -0.239516000 | -0.389105000 |
| 6 | 2.115625000  | -0.224153000 | 0.626977000  |
| 6 | -1.276445000 | 0.794663000  | 0.386782000  |
| 6 | 6.922572000  | -1.242022000 | -0.079401000 |
| 1 | 7.673495000  | -1.661708000 | -0.739442000 |
| 6 | -2.369194000 | 1.728214000  | 2.320990000  |
| 6 | -4.695902000 | 1.127585000  | 1.968687000  |
| 6 | 4.979587000  | -0.158757000 | 1.608395000  |
| 1 | 4.223689000  | 0.261523000  | 2.252491000  |
| 6 | 7.288274000  | -0.753578000 | 1.175518000  |
| 1 | 8.322731000  | -0.789952000 | 1.497048000  |
| 6 | -3.995029000 | 2.366734000  | 3.942696000  |
| 6 | -4.998326000 | 1.756262000  | 3.174221000  |
| 6 | 6.309803000  | -0.214530000 | 2.008023000  |
| 1 | 6.581059000  | 0.174840000  | 2.982864000  |
| 6 | -0.435587000 | -0.377803000 | -0.113208000 |
| 1 | 1.830966000  | -1.505119000 | -3.543180000 |
| 1 | 0.468430000  | -0.406283000 | -3.249126000 |
| 1 | 0.379648000  | -2.084169000 | -2.708679000 |

|    |              |             |              |
|----|--------------|-------------|--------------|
| 1  | -1.882886000 | 2.833759000 | 4.102944000  |
| 1  | -5.460154000 | 0.655076000 | 1.363725000  |
| 1  | -4.261958000 | 2.846594000 | 4.877462000  |
| 1  | -6.022698000 | 1.776801000 | 3.528536000  |
| 29 | -1.070577000 | 2.423974000 | -0.868366000 |
| 8  | -1.494269000 | 4.095446000 | -2.139415000 |
| 6  | -2.670421000 | 3.956272000 | -1.725306000 |
| 8  | -2.906688000 | 3.014221000 | -0.880733000 |
| 6  | -3.803271000 | 4.827564000 | -2.175385000 |
| 1  | -4.287770000 | 5.277839000 | -1.306514000 |
| 1  | -3.440296000 | 5.602621000 | -2.847952000 |
| 1  | -4.549700000 | 4.213048000 | -2.683922000 |
| 8  | 0.808320000  | 2.240258000 | -1.067534000 |
| 6  | 1.814327000  | 3.098680000 | -0.680310000 |
| 8  | 2.941487000  | 2.703313000 | -0.612138000 |
| 6  | 1.335429000  | 4.490124000 | -0.374205000 |
| 1  | 0.653303000  | 4.848011000 | -1.146499000 |
| 1  | 0.795565000  | 4.462464000 | 0.577360000  |
| 1  | 2.191835000  | 5.154046000 | -0.275893000 |
| 1  | 1.101087000  | 1.137458000 | -0.826767000 |

|   |              |              |              |
|---|--------------|--------------|--------------|
| 1 | -0.901442000 | -0.630941000 | -1.070943000 |
| 6 | -0.764967000 | -1.587376000 | 0.802787000  |
| 6 | -1.438740000 | -2.683908000 | 0.254611000  |
| 6 | -0.407038000 | -1.616778000 | 2.155795000  |
| 6 | -1.719629000 | -3.803961000 | 1.032199000  |
| 1 | -1.752459000 | -2.658796000 | -0.782476000 |
| 6 | -0.692328000 | -2.739799000 | 2.930331000  |
| 1 | 0.129294000  | -0.785228000 | 2.592390000  |
| 6 | -1.347250000 | -3.835454000 | 2.374530000  |
| 1 | -2.231784000 | -4.650020000 | 0.587574000  |
| 1 | -0.397871000 | -2.753354000 | 3.973723000  |
| 1 | -1.569139000 | -4.705673000 | 2.981927000  |

**(ix) C' (Minor stereoisomer)**

|   |              |              |              |
|---|--------------|--------------|--------------|
| 8 | -3.460279000 | -0.255810000 | 0.145720000  |
| 7 | 3.225105000  | -0.594772000 | 0.046482000  |
| 8 | 0.432429000  | 1.976735000  | 1.694459000  |
| 7 | 3.038861000  | -0.830475000 | -1.245981000 |
| 8 | 1.858985000  | -0.313299000 | 1.953255000  |
| 6 | 4.528728000  | -0.548500000 | 0.592644000  |

|   |              |              |              |
|---|--------------|--------------|--------------|
| 6 | 1.698088000  | -0.821679000 | -1.471596000 |
| 6 | -0.703931000 | 1.540448000  | 1.556356000  |
| 6 | 1.205083000  | -1.138824000 | -2.849625000 |
| 6 | -1.897947000 | 2.752086000  | 3.527016000  |
| 6 | 5.586858000  | -1.118540000 | -0.127865000 |
| 1 | 5.382795000  | -1.582028000 | -1.082782000 |
| 6 | -2.695903000 | 0.453900000  | 0.764900000  |
| 6 | -3.028749000 | 1.292153000  | 1.953569000  |
| 6 | 0.976143000  | -0.531913000 | -0.317342000 |
| 6 | 1.964059000  | -0.433230000 | 0.746416000  |
| 6 | -1.230655000 | 0.656377000  | 0.479023000  |
| 6 | 6.872615000  | -1.074719000 | 0.392108000  |
| 1 | 7.687992000  | -1.517709000 | -0.168190000 |
| 6 | -1.869817000 | 1.916447000  | 2.417672000  |
| 6 | -4.253207000 | 1.490202000  | 2.576480000  |
| 6 | 4.765140000  | 0.065396000  | 1.829469000  |
| 1 | 3.947648000  | 0.510226000  | 2.375409000  |
| 6 | 7.116781000  | -0.473631000 | 1.627556000  |
| 1 | 8.122302000  | -0.445157000 | 2.030916000  |
| 6 | -3.122789000 | 2.942939000  | 4.167404000  |

|    |              |              |              |
|----|--------------|--------------|--------------|
| 6  | -4.287133000 | 2.321186000  | 3.696332000  |
| 6  | 6.059883000  | 0.092286000  | 2.336610000  |
| 1  | 6.240773000  | 0.569555000  | 3.292788000  |
| 6  | -0.515984000 | -0.531171000 | -0.170463000 |
| 1  | 2.026151000  | -1.049773000 | -3.561327000 |
| 1  | 0.397446000  | -0.472343000 | -3.164301000 |
| 1  | 0.820923000  | -2.162456000 | -2.898936000 |
| 1  | -0.990368000 | 3.227403000  | 3.880219000  |
| 1  | -5.145166000 | 1.006404000  | 2.197015000  |
| 1  | -3.178393000 | 3.580163000  | 5.042930000  |
| 1  | -5.224976000 | 2.489936000  | 4.213601000  |
| 29 | -1.263638000 | 2.214112000  | -0.876397000 |
| 8  | -1.723453000 | 3.746865000  | -2.236764000 |
| 6  | -2.915425000 | 3.663033000  | -1.821758000 |
| 8  | -3.190505000 | 2.809070000  | -0.919124000 |
| 6  | -3.998610000 | 4.557458000  | -2.354671000 |
| 1  | -4.212509000 | 5.334774000  | -1.615949000 |
| 1  | -3.681734000 | 5.027580000  | -3.284385000 |
| 1  | -4.914296000 | 3.984602000  | -2.505339000 |
| 8  | 0.750764000  | 2.256447000  | -1.293786000 |



|   |              |              |              |
|---|--------------|--------------|--------------|
| 6 | 1.669236000  | 3.248658000  | -0.926674000 |
| 8 | 2.833261000  | 2.994203000  | -0.903285000 |
| 6 | 0.992753000  | 4.541017000  | -0.597009000 |
| 1 | 0.211581000  | 4.769513000  | -1.322971000 |
| 1 | 0.531152000  | 4.436255000  | 0.389208000  |
| 1 | 1.738271000  | 5.332060000  | -0.556845000 |
| 1 | 1.232443000  | 1.405048000  | -1.305558000 |
| 1 | -0.938678000 | -0.635018000 | -1.174505000 |
| 6 | -0.925434000 | -1.861092000 | 0.535695000  |
| 6 | -1.540652000 | -2.860215000 | -0.220062000 |
| 6 | -0.689460000 | -2.082858000 | 1.894359000  |
| 6 | -1.904068000 | -4.070323000 | 0.366912000  |
| 1 | -1.756582000 | -2.687581000 | -1.268290000 |
| 6 | -1.056049000 | -3.293129000 | 2.478755000  |
| 1 | -0.200042000 | -1.325156000 | 2.491644000  |
| 6 | -1.663026000 | -4.291240000 | 1.719640000  |
| 1 | -2.383162000 | -4.834643000 | -0.234863000 |
| 1 | -0.865454000 | -3.452444000 | 3.534272000  |
| 1 | -1.949157000 | -5.230265000 | 2.179700000  |

**(x) D (Minor stereoisomer)**

|   |              |              |              |
|---|--------------|--------------|--------------|
| 8 | -2.698694000 | -0.671976000 | -1.351202000 |
| 7 | 2.915481000  | -0.216656000 | 0.122402000  |
| 8 | -1.269612000 | 0.999684000  | 2.859980000  |
| 7 | 2.578089000  | -0.778069000 | -1.095345000 |
| 8 | 1.813124000  | 0.271906000  | 2.133709000  |
| 6 | 4.251600000  | 0.218282000  | 0.334687000  |
| 6 | 1.310132000  | -1.053999000 | -1.100170000 |
| 6 | -1.867829000 | 0.814361000  | 1.826278000  |
| 6 | 0.665090000  | -1.731903000 | -2.265826000 |
| 6 | -3.975921000 | 2.285686000  | 2.196383000  |
| 6 | 5.160890000  | 0.167723000  | -0.728556000 |
| 1 | 4.828833000  | -0.193475000 | -1.690732000 |
| 6 | -2.611832000 | -0.022576000 | -0.326842000 |
| 6 | -3.624426000 | 0.915997000  | 0.223900000  |
| 6 | 0.677109000  | -0.666886000 | 0.160483000  |
| 6 | 1.822856000  | -0.137210000 | 0.991938000  |
| 6 | -1.464161000 | -0.049031000 | 0.651198000  |
| 6 | 6.473608000  | 0.581231000  | -0.534054000 |
| 1 | 7.169079000  | 0.537305000  | -1.364842000 |

|    |              |              |              |
|----|--------------|--------------|--------------|
| 6  | -3.195848000 | 1.400758000  | 1.462233000  |
| 6  | -4.845823000 | 1.300900000  | -0.318581000 |
| 6  | 4.666084000  | 0.687497000  | 1.587474000  |
| 1  | 3.964590000  | 0.729314000  | 2.406004000  |
| 6  | 6.895881000  | 1.050345000  | 0.708074000  |
| 1  | 7.920308000  | 1.372949000  | 0.853475000  |
| 6  | -5.199213000 | 2.677461000  | 1.655733000  |
| 6  | -5.629495000 | 2.190739000  | 0.412677000  |
| 6  | 5.984683000  | 1.100339000  | 1.759108000  |
| 1  | 6.296476000  | 1.462757000  | 2.732307000  |
| 6  | -0.590340000 | -1.297959000 | 0.710189000  |
| 1  | 1.358356000  | -1.743184000 | -3.106660000 |
| 1  | -0.261959000 | -1.235033000 | -2.560680000 |
| 1  | 0.405751000  | -2.766868000 | -2.018420000 |
| 1  | -3.632417000 | 2.651303000  | 3.156667000  |
| 1  | -5.166924000 | 0.915557000  | -1.278864000 |
| 1  | -5.831464000 | 3.368569000  | 2.201571000  |
| 1  | -6.586551000 | 2.513538000  | 0.019009000  |
| 29 | -0.138138000 | 1.093198000  | -0.261335000 |
| 8  | 1.141967000  | 2.303300000  | -1.189310000 |

|   |              |              |              |
|---|--------------|--------------|--------------|
| 6 | 0.231256000  | 3.190494000  | -1.202443000 |
| 8 | -0.898912000 | 2.885042000  | -0.702300000 |
| 6 | 0.489392000  | 4.555415000  | -1.760489000 |
| 1 | 1.219785000  | 4.499695000  | -2.567163000 |
| 1 | -0.440177000 | 5.006309000  | -2.105798000 |
| 1 | 0.905532000  | 5.183209000  | -0.967358000 |
| 1 | -0.975972000 | -1.948740000 | -0.082987000 |
| 6 | -0.529033000 | -2.122151000 | 1.983053000  |
| 6 | -1.676392000 | -2.300554000 | 2.759592000  |
| 6 | 0.630015000  | -2.816964000 | 2.333427000  |
| 6 | -1.664084000 | -3.144956000 | 3.865594000  |
| 1 | -2.592631000 | -1.780225000 | 2.502931000  |
| 6 | 0.645594000  | -3.662640000 | 3.439664000  |
| 1 | 1.532830000  | -2.703971000 | 1.744286000  |
| 6 | -0.500756000 | -3.828128000 | 4.211855000  |
| 1 | -2.563476000 | -3.265253000 | 4.458941000  |
| 1 | 1.557986000  | -4.187396000 | 3.699424000  |
| 1 | -0.487580000 | -4.481589000 | 5.076653000  |

**(xi) TS<sub>D-D'</sub> (Minor stereoisomer)**

|   |              |              |              |
|---|--------------|--------------|--------------|
| 8 | -2.659834000 | -1.248572000 | -1.201400000 |
| 7 | 2.348526000  | -0.225967000 | 0.223890000  |
| 8 | -1.402808000 | 0.260995000  | 3.077211000  |
| 7 | 1.993126000  | -0.690460000 | -1.031869000 |
| 8 | 1.371668000  | -0.098342000 | 2.339560000  |
| 6 | 3.606341000  | 0.414864000  | 0.390706000  |
| 6 | 0.778202000  | -1.120908000 | -1.013121000 |
| 6 | -1.717430000 | 0.277845000  | 1.916156000  |
| 6 | 0.195363000  | -1.764943000 | -2.228575000 |
| 6 | -3.059915000 | 2.499433000  | 1.762601000  |
| 6 | 4.277974000  | 0.892675000  | -0.738546000 |
| 1 | 3.820011000  | 0.781959000  | -1.710546000 |
| 6 | -2.401898000 | -0.493217000 | -0.290329000 |
| 6 | -2.999806000 | 0.836711000  | -0.017357000 |
| 6 | 0.212375000  | -1.027403000 | 0.365564000  |
| 6 | 1.341321000  | -0.381956000 | 1.164274000  |
| 6 | -1.382494000 | -0.733609000 | 0.815482000  |
| 6 | 5.516133000  | 1.506813000  | -0.592069000 |
| 1 | 6.031327000  | 1.875527000  | -1.471909000 |

|    |              |              |              |
|----|--------------|--------------|--------------|
| 6  | -2.583880000 | 1.296563000  | 1.247006000  |
| 6  | -3.895040000 | 1.571408000  | -0.793048000 |
| 6  | 4.170940000  | 0.561364000  | 1.662063000  |
| 1  | 3.641903000  | 0.205341000  | 2.532790000  |
| 6  | 6.088794000  | 1.658725000  | 0.669488000  |
| 1  | 7.052770000  | 2.142154000  | 0.778265000  |
| 6  | -3.923531000 | 3.246382000  | 0.970666000  |
| 6  | -4.337173000 | 2.788020000  | -0.290075000 |
| 6  | 5.408318000  | 1.187258000  | 1.788705000  |
| 1  | 5.840866000  | 1.300863000  | 2.776343000  |
| 6  | -0.720592000 | -2.057078000 | 0.955013000  |
| 1  | 0.961380000  | -1.783110000 | -3.003516000 |
| 1  | -0.681872000 | -1.234397000 | -2.599723000 |
| 1  | -0.121809000 | -2.790836000 | -2.020069000 |
| 1  | -2.745047000 | 2.836440000  | 2.742246000  |
| 1  | -4.214014000 | 1.202580000  | -1.759806000 |
| 1  | -4.285538000 | 4.202743000  | 1.328667000  |
| 1  | -5.009517000 | 3.399469000  | -0.879685000 |
| 29 | -0.593380000 | 1.184774000  | -0.123825000 |
| 8  | 0.679063000  | 2.323582000  | -0.948638000 |

|   |              |              |              |
|---|--------------|--------------|--------------|
| 6 | 0.048514000  | 3.436842000  | -1.166524000 |
| 8 | -1.139284000 | 3.607108000  | -0.874977000 |
| 6 | 0.879502000  | 4.527380000  | -1.811957000 |
| 1 | 1.264668000  | 4.175612000  | -2.771899000 |
| 1 | 0.282601000  | 5.425983000  | -1.958062000 |
| 1 | 1.743180000  | 4.750235000  | -1.181447000 |
| 1 | -1.086356000 | -2.727938000 | 0.176449000  |
| 6 | -0.461179000 | -2.756492000 | 2.260109000  |
| 6 | -1.479807000 | -2.903179000 | 3.202959000  |
| 6 | 0.771733000  | -3.371169000 | 2.488763000  |
| 6 | -1.266583000 | -3.646722000 | 4.359859000  |
| 1 | -2.440272000 | -2.429619000 | 3.039271000  |
| 6 | 0.986075000  | -4.113667000 | 3.646114000  |
| 1 | 1.570879000  | -3.268027000 | 1.762851000  |
| 6 | -0.033006000 | -4.252944000 | 4.585173000  |
| 1 | -2.063278000 | -3.746401000 | 5.088098000  |
| 1 | 1.950270000  | -4.579348000 | 3.814768000  |
| 1 | 0.134236000  | -4.827873000 | 5.488804000  |

**(xii) D' (Minor stereoisomer)**

|   |              |              |              |
|---|--------------|--------------|--------------|
| 8 | -2.641934000 | -1.274586000 | -1.137479000 |
| 7 | 2.304068000  | -0.002891000 | 0.288816000  |
| 8 | -1.373015000 | 0.330946000  | 3.057843000  |
| 7 | 1.943825000  | -0.380165000 | -1.001967000 |
| 8 | 1.365024000  | -0.125370000 | 2.419800000  |
| 6 | 3.588047000  | 0.564293000  | 0.500756000  |
| 6 | 0.759779000  | -0.885242000 | -0.993981000 |
| 6 | -1.632227000 | 0.347054000  | 1.885559000  |
| 6 | 0.154696000  | -1.367676000 | -2.271419000 |
| 6 | -3.218907000 | 2.416229000  | 1.842569000  |
| 6 | 4.495066000  | 0.614513000  | -0.565629000 |
| 1 | 4.202411000  | 0.219991000  | -1.527610000 |
| 6 | -2.332291000 | -0.476130000 | -0.285819000 |
| 6 | -2.952153000 | 0.860845000  | -0.051926000 |
| 6 | 0.210697000  | -0.926517000 | 0.392796000  |
| 6 | 1.322392000  | -0.301307000 | 1.224640000  |
| 6 | -1.287168000 | -0.680054000 | 0.806275000  |
| 6 | 5.756316000  | 1.168123000  | -0.374479000 |
| 1 | 6.449800000  | 1.201150000  | -1.207460000 |



|    |              |              |              |
|----|--------------|--------------|--------------|
| 6  | -2.502578000 | 1.371722000  | 1.206309000  |
| 6  | -4.116828000 | 1.391171000  | -0.664953000 |
| 6  | 3.956246000  | 1.068575000  | 1.754808000  |
| 1  | 3.259400000  | 1.026346000  | 2.577064000  |
| 6  | 6.131402000  | 1.671433000  | 0.869013000  |
| 1  | 7.116227000  | 2.100343000  | 1.013162000  |
| 6  | -4.308359000 | 2.956107000  | 1.196612000  |
| 6  | -4.756931000 | 2.443716000  | -0.051360000 |
| 6  | 5.224689000  | 1.616149000  | 1.924109000  |
| 1  | 5.500083000  | 2.004813000  | 2.898104000  |
| 6  | -0.666590000 | -2.030701000 | 0.958034000  |
| 1  | 0.943483000  | -1.435339000 | -3.020658000 |
| 1  | -0.604384000 | -0.671463000 | -2.633904000 |
| 1  | -0.324887000 | -2.340902000 | -2.153722000 |
| 1  | -2.909508000 | 2.751991000  | 2.824769000  |
| 1  | -4.482228000 | 0.955602000  | -1.586754000 |
| 1  | -4.862104000 | 3.763660000  | 1.661057000  |
| 1  | -5.641531000 | 2.873042000  | -0.507047000 |
| 29 | -1.316597000 | 2.007265000  | -0.321217000 |
| 8  | -0.430301000 | 2.328565000  | -2.124822000 |

|   |              |              |              |
|---|--------------|--------------|--------------|
| 6 | 0.413597000  | 3.055140000  | -1.511836000 |
| 8 | 0.293100000  | 3.222726000  | -0.258515000 |
| 6 | 1.561834000  | 3.681622000  | -2.251479000 |
| 1 | 1.316111000  | 3.806028000  | -3.305238000 |
| 1 | 1.829085000  | 4.635583000  | -1.797706000 |
| 1 | 2.426265000  | 3.016366000  | -2.171530000 |
| 1 | -1.025879000 | -2.690315000 | 0.168284000  |
| 6 | -0.385527000 | -2.739247000 | 2.250712000  |
| 6 | -1.363105000 | -2.841120000 | 3.241696000  |
| 6 | 0.829143000  | -3.407962000 | 2.423746000  |
| 6 | -1.126901000 | -3.591532000 | 4.390168000  |
| 1 | -2.307816000 | -2.325446000 | 3.122638000  |
| 6 | 1.066476000  | -4.157020000 | 3.571853000  |
| 1 | 1.596539000  | -3.337345000 | 1.660478000  |
| 6 | 0.088136000  | -4.250509000 | 4.559162000  |
| 1 | -1.891673000 | -3.655140000 | 5.155869000  |
| 1 | 2.016891000  | -4.663274000 | 3.696542000  |
| 1 | 0.273309000  | -4.830382000 | 5.456206000  |

## References (For computational part):

1. G. W. T. M. J. Frisch, H. B. Schlegel, G. E. Scuseria, M. A. Robb, J. R. Cheeseman, G. Scalmani, V. Barone, G. A. Petersson, H. Nakatsuji, X. Li, M. Caricato, A. Marenich, J. Bloino, B. G. Janesko, R. Gomperts, B. Mennucci, H. P. Hratchian, J. V. Ortiz, A. F. Izmaylov, J. L. Sonnenberg, D. Williams-Young, F. Ding, F. Lipparini, F. Egidi, J. Goings, B. Peng, A. Petrone, T. Henderson, D. Ranasinghe, V. G. Zakrzewski, J. Gao, N. Rega, G. Zheng, W. Liang, M. Hada, M. Ehara, K. Toyota, R. Fukuda, J. Hasegawa, M. Ishida, T. Nakajima, Y. Honda, O. Kitao, H. Nakai, T. Vreven, K. Throssell, J. A. Montgomery, Jr., J. E. Peralta, F. Ogliaro, M. Bearpark, J. J. Heyd, E. Brothers, K. N. Kudin, V. N. Staroverov, T. Keith, R. Kobayashi, J. Normand, K. Raghavachari, A. Rendell, J. C. Burant, S. S. Iyengar, J. Tomasi, M. Cossi, J. M. Millam, M. Klene, C. Adamo, R. Cammi, J. W. Ochterski, R. L. Martin, K. Morokuma, O. Farkas, J. B. Foresman, and D. J. Fox, *Gaussian, Inc., Wallingford CT, 2016.*, 2009.
2. P. J. Stephens, F. J. Devlin, C. F. Chabalowski and M. J. Frisch, *The Journal of Physical Chemistry*, 1994, **98**, 11623-11627.
